# Supplementary material for: Role of the family doctor in the management of adults with obesity: a scoping review
Source: PubMed Central journal article supplement — BMJ Open. 2018 Feb 16;8(2):e019367. doi: 10.1136/bmjopen-2017-019367 (PMC5829928; doi:10.1136/bmjopen-2017-019367), 2018-02-16
Supplement: bmjopen-2017-019367.draft_revisions.pdf [file bmjopen-2017-019367.draft_revisions.pdf]

# BMJ Open

BMJ Open is committed to open peer review. As part of this commitment we make the peer review history of every article we publish publicly available.

When an article is published we post the peer reviewers' comments and the authors' responses online. We also post the versions of the paper that were used during peer review. These are the versions that the peer review comments apply to.

The versions of the paper that follow are the versions that were submitted during the peer review process. They are not the versions of record or the final published versions. They should not be cited or distributed as the published version of this manuscript.

BMJ Open is an open access journal and the full, final, typeset and author-corrected version of record of the manuscript is available on our site with no access controls, subscription charges or pay-per-view fees (<http://bmjopen.bmj.com>).

If you have any questions on BMJ Open's open peer review process please email [editorial.bmjopen@bmj.com](mailto:editorial.bmjopen@bmj.com)

# BMJ Open

## The role of the family doctor in the management of adults with obesity: a scoping review

|                               |                                                                                                                                                                                                                                                                                                                                                                                                                                                                                                                                                                                                   |
|-------------------------------|---------------------------------------------------------------------------------------------------------------------------------------------------------------------------------------------------------------------------------------------------------------------------------------------------------------------------------------------------------------------------------------------------------------------------------------------------------------------------------------------------------------------------------------------------------------------------------------------------|
| Journal:                      | <i>BMJ Open</i>                                                                                                                                                                                                                                                                                                                                                                                                                                                                                                                                                                                   |
| Manuscript ID                 | bmjopen-2017-019367                                                                                                                                                                                                                                                                                                                                                                                                                                                                                                                                                                               |
| Article Type:                 | Research                                                                                                                                                                                                                                                                                                                                                                                                                                                                                                                                                                                          |
| Date Submitted by the Author: | 30-Aug-2017                                                                                                                                                                                                                                                                                                                                                                                                                                                                                                                                                                                       |
| Complete List of Authors:     | Sturgiss, Elizabeth; Australian Nation University Medical School, Academic Unit of General Practice<br>Elmitt, Nicholas; Australian Nation University Medical School, Academic Unit of General Practice<br>Haelser, E; Australian National University, Academic Unit of General Practice; Curtin University,<br>van Weel, Chris; Radboud university medical center, Department of Primary and Community Care; Australian National University, Department of Health Services Research and Policy<br>Douglas, Kirsty; Australian National University, Australian National University Medical School |
| Keywords:                     | Protocols & guidelines < HEALTH SERVICES ADMINISTRATION & MANAGEMENT, PREVENTIVE MEDICINE, PRIMARY CARE                                                                                                                                                                                                                                                                                                                                                                                                                                                                                           |
|                               |                                                                                                                                                                                                                                                                                                                                                                                                                                                                                                                                                                                                   |

SCHOLARONE™  
Manuscripts

**Title****The role of the family doctor in the management of adults with obesity: a scoping review****Corresponding Author**

\*Elizabeth Ann Sturgiss  
Academic Unit of General Practice  
Australian National University Medical School  
PO Box 11  
Woden, 2606, ACT, AUSTRALIA  
[Elizabeth.sturgiss@anu.edu.au](mailto:Elizabeth.sturgiss@anu.edu.au)  
+61 412 233 119

**Authors**

Elizabeth Sturgiss\*

Nicholas Elmitt; Academic Unit of General Practice, The Australian National University, Canberra, Australia

Emily Haesler; School of Nursing, Midwifery and Paramedicine, Curtin University, Perth, Australia; Academic Unit of General Practice, The Australian National University, Canberra, Australia

Chris van Weel; Department of Primary and Community Care, Radboud University Medical Center, Nijmegen, The Netherlands; Academic Unit of General Practice, The Australian National University, Canberra, Australia

Kirsty Douglas; Academic Unit of General Practice, The Australian National University, Canberra, Australia

**Word Count** 3122

## ABSTRACT

### Objectives

Obesity management is an important issue for the international primary care community. This scoping review aims to examine and map the current research base for the role of the family doctor in managing adults with obesity. The methods were prospectively published and followed Joanna Briggs Institute methodology.

### Setting

Primary care.

### Included papers

Black and grey literature with the key words obesity, primary care, and family doctors were included. 3294 non-duplicate papers were identified and 225 articles included after full text review.

### Primary and secondary outcome measures

Data was extracted on whether the family doctor was involved in different aspects of management, and whether whole person and person-centred care were explicitly mentioned.

### Results

110 papers described interventions in primary care where family doctors were always involved in diagnosis of obesity and often in recruitment of participants. A clear description of the provider involved in an intervention was often lacking. It was difficult to determine if interventions took account of whole person and person-centredness. Most opinion papers and clinical overviews described an extensive role for the family doctor in management, in contrast research on current practices depicted obesity as under-managed by family doctors. International guidelines varied in their description of the role of the family doctor with a more extensive role suggested by guidelines originating from family medicine organisations.

### Conclusions

There is a disconnect between how family doctors are involved in primary care interventions, the message in clinical overviews and opinion papers, and observed current practice of family doctors. The role of family doctors in international guidelines for obesity may reflect the strength of primary care in the originating health system. Reporting of primary care interventions could be improved by

1  
2  
3 enhanced descriptions of the providers involved and explanation of how the pillars of primary care  
4 are used in intervention development.  
5  
6  
7  
8  
9  
10

### 11 **Strengths and limitations of this study**

- 14 • The protocol for this scoping review was prospectively published and was based on the  
15 Joanna Briggs Institute (JBI) scoping review methodology.<sup>1</sup>
- 17 • All types of articles have been included in this scoping review including international  
18 guidelines from relevant family medicine colleges.
- 20 • Articles in languages other than English were excluded from the review and therefore the  
21 results are not representative of non-English speaking countries.
- 23 • Feedback was obtained from three groups of interested clinical and academic colleagues in  
24 Australia and internationally as per the JBI methodology for a scoping review.  
25  
26

### 27 **Funding statement**

28 This research received no specific grant from any funding agency in the public, commercial or not-  
29 for-profit sectors.  
30  
31

### 32 **Competing interests statement**

33 The authors have no competing interests to declare.  
34  
35  
36  
37  
38

## 39 **INTRODUCTION**

40  
41 Obesity is recognised as a risk factor for the development of chronic disease and is often co-morbid  
42 with diseases such as diabetes, osteoarthritis, cardiovascular disease, and depression.<sup>2</sup> As such,  
43 obesity is a condition that is commonly associated with a larger set of health issues encountered by  
44 an individual. As in all cases of multi-morbidity, a person's care will benefit from the co-ordinated  
45 and continuous care offered by primary care.<sup>3</sup> This is why the details of the management of obesity  
46 in primary care are important to understand.  
47  
48  
49  
50

51 With the rising numbers of people living with obesity and related chronic diseases, there is an  
52 increasing demand from health systems for primary care, and family doctors in particular, to identify  
53 and manage this as a health problem.<sup>4</sup> With this changing landscape, it was anticipated that the  
54 academic literature would explore the effectiveness of primary care, as well as the involvement of  
55  
56  
57  
58  
59  
60

1  
2  
3 different practitioners in obesity management. However, our initial explorations into this literature  
4 found a lack of clarity in this area. This scoping review aims to examine and map the current  
5 research base for the role of the family doctor in managing adults with obesity.  
6  
7

8 The term used to describe a family doctor varies internationally, and includes general practitioner  
9 and family physician. The term “primary care physician”, which stems from the USA, includes  
10 paediatricians, obstetricians, and internists. In this review, we define “family doctor” as meaning a  
11 physician with specialist training in primary care who practices in the community, as an expert  
12 generalist.  
13  
14  
15

16  
17 Different practitioners will bring varying strengths and limitations to any intervention and it is  
18 important for family doctors to understand what skills they offer in the setting of obesity  
19 management. The importance of understanding provider role is demonstrated in the methodology  
20 of critical realism where realist evaluation acknowledges the importance of context of any  
21 intervention.<sup>5</sup> Translating rigorous scientific trials into policy and practice is challenging and realist  
22 evaluation is an increasingly utilised tool to inform effective translation of evidence.<sup>6</sup> Part of  
23 understanding context in the realist evaluation is knowing the type of provider, and their experience  
24 level, in delivering an intervention. This scoping review provides an overview of the role of the family  
25 doctor in interventions, clinical overviews and opinions, observed practice, and clinical guidelines.  
26  
27  
28  
29  
30  
31

32 The pillars of primary care—being the first point of health system entry and delivering continuous,  
33 whole person and person-centred care—are well established.<sup>7</sup> Other tiers of the health system may  
34 provide some, but not all, of the four pillars. Each of these concepts needs to be present in the  
35 management of a patient to gain the full benefits of primary care.<sup>8</sup> Patient management that is not  
36 based around these four pillars is unlikely to reap the benefits of co-ordinated, comprehensive,  
37 expert generalist care.<sup>9-11</sup>  
38  
39  
40  
41

42 Our scoping review of interventions involving family doctors in the management of obesity drew on  
43 the TIDieR guidelines for the description of interventions.<sup>12</sup> These guidelines outline the parts of  
44 interventions that need to be described in order for other practitioners to replicate the intervention,  
45 either for research or clinical practice. TIDieR was developed to standardise intervention description  
46 and support their implementation, which has been an undervalued aspect of health research.<sup>12</sup>  
47  
48  
49  
50

51 The objectives, inclusion criteria and methods of analysis for this review were specified in advance  
52 and documented in a protocol.<sup>13</sup> The scoping review questions we aimed to answer were:

- 53  
54  
55 1. What supporting evidence do we have for the role family doctors play in obesity management for  
56 adults in primary care?  
57  
58  
59  
60

- 1
- 2
- 3 2. What is the role of the family doctor in managing obesity as a primary risk as supported by the
- 4 evidence base?
- 5
- 6 3. What do primary care guidelines say about the role of the family doctor? What do peak bodies say
- 7 about the role of the family doctor? Are these both in line with what is conveyed by current
- 8 research?
- 9
- 10
- 11

12 This scoping review is the first step in broadly identifying the literature to recognise any emerging  
13 patterns or gaps in the research base on family doctors in the delivery of interventions to manage  
14 obesity.  
15

## 16 **METHODS**

17  
18  
19 The complete methods were prospectively published in a protocol.<sup>13</sup> A preliminary search for  
20 existing scoping reviews did not find any with the same concept and topic (databases searched  
21 JBISIRIR, Cochrane Database of Systematic Reviews, CINAHL, PubMed, EPPI). Manuscripts were  
22 included when they involved adults (18 years +) with a Body Mass Index (BMI) of greater than 25  
23 (overweight or obesity), any involvement of a primary care doctor/physician, a primary care setting,  
24 and inclusion of obesity management. Contrary to our outlined protocol we excluded papers in  
25 languages other than English, including those with an English abstract, as we could not perform data  
26 extraction adequately on these papers.  
27

28  
29 This scoping review was purposefully restricted to obesity management of adults in primary care. As  
30 suggested in the JBI methodology, scope has to take account of feasibility whilst maintaining a broad  
31 and comprehensive approach. By restricting the scoping review to obesity, we were feasibly able to  
32 extract more detail about the family doctor's role than if we had included all non-communicable  
33 diseases. For this same reason we did not include articles that were only describing nutrition care or  
34 physical activity advice unless they were specifically in relation to care of a patient with obesity. Due  
35 to the differences in the management of obesity in children and adolescents this population group  
36 was not included in this review.  
37

38  
39 Our search strategy was completed in September 2015. We sought relevant clinical guidelines from  
40 pre-defined countries of interest (Australia, UK, USA, New Zealand, The Netherlands, Denmark,  
41 Finland, Estonia, Slovenia, Belgium, Spain, and Portugal) and contacted family medicine colleges in  
42 these countries via email when guidelines were not found on their websites.  
43  
44  
45  
46  
47

1  
2  
3 Two reviewers (LS, NE) reviewed the abstracts and then full papers as described in the flow chart  
4 (Figure 1). Our data extraction tool captured the author, country of intervention, year of publication,  
5 aim, term used to describe the primary care practitioner, methodology, type of involvement of the  
6 primary care doctor, skills needed by the doctor, and whether the pillars of primary care were  
7 identified. Whole person care was considered if the paper described obesity management provided  
8 in the context of other health needs. Person-centredness was considered as incorporated when the  
9 patient's values, beliefs, cultural needs, or context of their community were discussed. First point of  
10 contact with the health system was part of all the interventions as "primary care" was part of the  
11 search term. Elements of continuity of care were captured with data extracted about  
12 communication between any other types of providers and the family doctor.  
13  
14  
15  
16  
17  
18

19 We iteratively developed the data extraction tool based on the information we found in a first pass  
20 of all of the intervention papers. The role of the family doctor was extracted in line with clinical  
21 management processes in a primary care setting starting with anthropometric measurements,  
22 diagnosis, referrals, nutrition care, physical activity advice, as well as more intensive treatments such  
23 as medications and bariatric surgery. For the interventions articles, data specific to clinical trials was  
24 extracted such as recruitment and control or intervention involvement. A third reviewer (EH)  
25 reviewed the extraction data sheets and recommended additional details to be added and reviewed  
26 the guideline extraction in full.  
27  
28  
29  
30  
31  
32

33 Results were presented to stakeholders including patients, clinicians, primary health network  
34 representatives, chronic disease organisations, and academics at three sessions (April 2015  
35 preliminary results presented during a seminar in Canberra; March 2016 results presented to  
36 international academic audience in the Netherlands; June 2017 results presented at an academic  
37 meeting of clinicians and academics). The input from these meetings was used to clarify the reasons  
38 for the review, the meaning behind each of the data extraction points, and the synthesis of the  
39 findings.  
40  
41  
42  
43

## 44 **RESULTS**

45  
46  
47 This scoping review uncovered 3294 non-duplicate citations, and after title and abstract screening  
48 516 articles were reviewed in full. 291 articles were excluded on full review for the reasons shown in  
49 the PRISMA diagram (Figure 1). 225 articles were included in the final review.  
50  
51

52 Using the focus of the three scoping questions, the following is a description of the literature that  
53 was reviewed.  
54  
55  
56  
57  
58  
59  
60



1  
2  
3 **1. What supporting evidence do we have for role family doctors play in obesity management**  
4 **for adults in primary care?**  
5

6 Of the 225 articles that were included in the review, 110 were about interventions in primary care.  
7 There were 77 different interventions described in these papers as some intervention were  
8 portrayed in multiple papers (Table 1 and 2). 57% (44/77) of the interventions were carried out in  
9 the USA, with the remainder taking place in a variety of countries (Table 1). 48% (37/77) of the  
10 interventions described were randomised controlled trials (Table 1).  
11  
12  
13

14  
15 There were a total of 74 articles that were clinical overviews and opinion papers on the primary care  
16 management of obesity that included discussion of the role of the family doctor (Table 3), and 24  
17 papers that described current practice of family doctors in obesity management, usually through  
18 surveys or clinical audits (Table 4). There were 16 international guidelines relevant to family doctors  
19 focused on the management of obesity (Table 5).  
20  
21  
22

23  
24 **2. What is the role of the family doctor in managing obesity as a primary risk as supported by**  
25 **the evidence base?**  
26

27 In all types of articles, the family doctor was frequently involved in the diagnosis of obesity (73/110  
28 intervention papers, 69/74 overview papers, 22/24 current practice papers). They were involved in  
29 height and weight measurements in 111 out 225 total papers, and overall waist circumference was  
30 infrequently mentioned in all articles (50/209 papers, not including guidelines).  
31  
32  
33

34 We included all interventions relevant to the review, whether they were reported the family  
35 doctor's role as part of an experimental intervention or in a control arm. In 45 of the 77  
36 interventions the family doctor was involved in recruiting patients to the trial. The family doctor only  
37 had a role in care-delivery in 27 interventions (35%) in either the intervention or control arm of a  
38 trial. Across all interventions, "standard care" was used in 27 trials, however it was only well-  
39 described in 12 of these. In one case, the "primary care provider" was used in the standard care arm  
40 but was "instructed not to provide specific behavioral strategies for changing eating and activity  
41 habits".<sup>14</sup>  
42  
43  
44  
45  
46

47 We attempted to describe whether the pillars of primary care could be identified in the  
48 interventions as they were described. In 17 of the 77 interventions the comprehensive, holistic care  
49 of the patient was described. In only seven of the interventions could person-centredness be seen in  
50 the description of the intervention.  
51  
52  
53

54 Twelve (50%) articles about current practice, including audits and surveys, mentioned a lack of  
55 recognition and treatment of obesity by family doctors. Overview and opinion articles generally  
56  
57  
58  
59

1  
2  
3 reported that the family doctor should be involved in all stages of management from diagnosis,  
4 nutrition and physical activity counseling, and ongoing follow up. Not surprisingly, papers that were  
5 mainly about pharmacological interventions or bariatric surgery were only about that area of  
6 management. Bariatric surgery papers described the family doctor as required for referral, but not  
7 work up, and some described the family doctor's role in ongoing management after surgery.  
8  
9  
10

11  
12  
13 **3. What do primary care guidelines say about the role of the family doctor? What do peak**  
14 **bodies say about the role of the family doctor? Are these both in line with what is**  
15 **conveyed by current research?**  
16

17 In terms of the specific role of the family doctor, guidelines were variable and ranged from no  
18 mention of the family doctor, to the family doctor being involved in every stage of management  
19 from diagnosis and advice on nutrition and physical activity, through to intensive treatments and  
20 long term follow up. Not surprisingly guidelines written by family medicine organisations described a  
21 greater role for the family doctor. For guidelines that were written with a national healthcare focus,  
22 there was less detail on the type of professional that should be involved in each of the management  
23 areas.  
24  
25  
26  
27  
28

29 Seven of the 16 guidelines specifically mentioned family doctors (or synonym), with one referring to  
30 "primary care providers" (Table 5). Seven (44%) suggested the family doctor should be involved in  
31 anthropometric measures of the patient, five (31%) recommended the family doctor should provide  
32 nutrition and physical activity advice, and seven discussed the referral to allied health providers by  
33 the family doctor.  
34  
35  
36  
37  
38  
39

40 **DISCUSSION**  
41

42 This scoping review synthesises the current evidence base for the role of the family doctor in the  
43 management of obesity in primary care. The family doctor is mostly used as a recruitment source in  
44 primary care interventions, the majority of which have been carried out in the USA. This is in  
45 contrast to guidelines, clinical overviews and opinions that suggest a role for family doctors from  
46 diagnosis, offering lifestyle advice and behavioural support, and ongoing follow up. Half of the  
47 articles that described current practice, mostly through clinical audits or surveys, reported that  
48 obesity was under-recognised by family doctors. There appears to be a misalignment between what  
49 commentators suggest as a role for the family doctor, and the current role they play in many primary  
50 care interventions.  
51  
52  
53  
54  
55  
56  
57  
58  
59  
60

### Implications for Practice

Guidelines are documents that are developed to assist practitioners in deciding on a course of action in a specific clinical circumstance<sup>15</sup> and they often determine a standard of care. The obesity guidelines that were identified in this review had varying recommendations for the role of the family doctor. In some jurisdictions, including Australia, national guidelines do not often recommend that a specific profession must be responsible for a task, unless the task is limited to the scope of one profession alone. In contrast, in the Netherlands where the central role of family doctors is prescribed within the health system, family doctors are likely to have a foundational role in all guidelines that are produced. The role of guidelines and their development varies between nations and health systems and the centrality of the role of the family doctor in a guideline may reflect the strength of primary care in the specific healthcare system. Therefore, guidelines may not always be the definitive source for determining the clinical scope and responsibilities of specific professional groups such as family doctors in obesity care.

### Implications for Research

This comprehensive set of articles provides the research community with a resource for further study, for example systematic reviews and meta-analyses based on different aspects of primary care management. We were also able to identify areas of concern for the publication of primary care research in obesity management. Twenty-seven of the interventions used standard care in the control arm, but standard care was poorly defined in 15 of these interventions. It is difficult to determine the relative effectiveness of new interventions in the management of obesity in primary care when they are compared to poorly defined standard care. More worryingly, was the use of sub-standard care where family doctors were advised not to give lifestyle advice to patients.<sup>14</sup> This suggest that usual care was artificially reduced in order to improve the apparent effectiveness of an intervention. This is a dubious practice from an ethical and scientific perspective and undermines the role of family doctors in obesity management.

Poor descriptions of interventions could have been aided by adherence to the TIDieR guidelines.<sup>12</sup> Specifically, the TIDieR guidelines suggest the health professionals involved in an intervention should be described in terms of their professional background, their expertise, and any specific training given. The terms used to describe a family doctor were diverse in the intervention papers and ranged from primary care physician, primary care provider, family physician, or general practitioner. The range of terms that are used in the primary care literature makes it impossible to understand the qualifications of professionals involved in the interventions. Trials from the USA often use “primary care providers” or “primary care practitioners”, nebulous terms that could include a variety

1  
2  
3 of professionals with vastly different training. This is particularly problematic when international  
4 primary care teams attempt to translate interventions to their local context. An international  
5 taxonomy for describing family doctors could assist in solving this issue.  
6  
7

8 The primary care literature has thoroughly described the fundamental factors that make primary  
9 care effective.<sup>7</sup> However, it was challenging for reviewers to determine if interventions were  
10 inclusive of the principles of person-centredness and whole person care. Knowing that first point of  
11 contact, whole person, co-ordinated, person-centred, continuous care, is important in primary care;  
12 it would be helpful for primary care interventions to explicitly consider these factors in their design.  
13 Additionally, the specific reporting of these factors in primary care trials would be helpful in  
14 publications to improve the understanding of how and why primary care interventions work. It is  
15 perhaps important that primary care determines a specific set of reporting requirements for primary  
16 care research that could be added to the TIDieR checklist.  
17  
18  
19  
20  
21  
22

### 23 Limitations

24 This scoping review is limited to the context of obesity management in primary care. Articles that  
25 reported on other important and related topics like nutrition, lifestyle change, or cardiovascular  
26 health, were not included. We chose to limit the review to obesity as we were interested in this  
27 specific literature and wanted to maintain the depth of our data extraction whilst maintaining  
28 feasibility. The review was also limited to publications in the English language and this may have  
29 missed work that included family doctors in non-English speaking healthcare settings. As expected in  
30 a scoping review, articles were not assessed for quality or the specific outcomes of reported trials.  
31 The aim of the scoping review is to widely and broadly search the literature to identify any gaps, and  
32 provide a platform for further systematic work.<sup>1</sup>  
33  
34  
35  
36  
37  
38  
39

### 40 **CONCLUSION**

41 There appears to be a disconnect between how family doctors are involved in primary care  
42 interventions, the message that is found in academic literature, and the apparent role of the family  
43 doctor in current practice. Guidelines that are developed by national bodies are not necessarily the  
44 definitive source of information for the discrete role of specific health professionals. Improvement is  
45 required in the reporting of primary care interventions, particularly in the professional background  
46 of those involved in the trial and the acknowledgment of the pillars of primary care in intervention  
47 development. This foundation work provides a platform for further interpretation of existing  
48 literature on the role of the family doctor in obesity management.  
49  
50  
51  
52  
53  
54  
55  
56  
57  
58  
59  
60

### Author contributions

ES, NE, EH, CvW, KD were part of the development and publication of the protocol. ES and NE were involved in the search and data extraction. EH was the third author to check the data extraction tool. ES and NE did the initial analysis and synthesis. ES and NE presented the findings of the scoping review at the stakeholder sessions. ES wrote the first draft of the manuscript. ES, NE, EH, CvW, KD then contributed to the writing of the manuscript and approved the final version. Dr Ginny Sargent is acknowledged and thanked for her assistance in developing the protocol, feedback on the final analysis, and review of the manuscript.

### Data sharing statement

Further data about the studies that were excluded from the scoping review is available by request from the authors. All data regarding included studies in included in this paper and no additional data on these studies is available.

### REFERENCES

1. The Joanna Briggs Institute. *The Joanna Briggs Institute Reviewers' Manual 2015 Methodology for JBI Scoping Reviews*. Adelaide, Australia: Joanna Briggs Institute,, 2015.
2. Clinical practice guidelines for the management of overweight and obesity in adults, adolescents and children in Australia. In: Council NHaMR, ed. Melbourne: National Health and Medical Research Council, 2013.
3. Bayliss EA. Simplifying Care for Complex Patients. *Annals of Family Medicine* 2012;**10**(1):3-5 doi: 10.1370/afm.1352[published Online First: Epub Date]].
4. Jansen S, Desbrow B, Ball L. Obesity management by general practitioners: the unavoidable necessity. *Australian journal of primary health* 2015;**21**(4):366-8 doi: 10.1071/py15018[published Online First: Epub Date]].
5. Clark AM, Briffa TG, Thirsk L, et al. What football teaches us about researching complex health interventions. *BMJ : British Medical Journal* 2012;**345** doi: 10.1136/bmj.e8316[published Online First: Epub Date]].
6. Wong G, Westhorp G, Manzano A, et al. RAMESES II reporting standards for realist evaluations. *BMC Medicine* 2016;**14**:96 doi: 10.1186/s12916-016-0643-1[published Online First: Epub Date]].
7. Stange KC. Barbara Starfield: Passage of the Pathfinder of Primary Care. *Annals of Family Medicine* 2011;**9**(4):292-96 doi: 10.1370/afm.1293[published Online First: Epub Date]].
8. Chapter 1: Meeting people's health needs. In: Kidd M, ed. *The contribution of family medicine to improving health systems: a guidebook from the World Organization of Family Doctors*. 2nd ed. London: Radcliffe Publishing, 2013:1-13.
9. Stange KC. A science of connectedness. *Ann Fam Med* 2009;**7**(5):387-95 doi: 10.1370/afm.990[published Online First: Epub Date]].
10. Stange K. The paradox of the parts and the whole in understanding and improving general practice. *International Journal for Quality in Health Care* 2002;**14**(4):267-8

11. Gray DP, Evans P, Sweeney K, et al. Towards a theory of continuity of care. *Journal of the Royal Society of Medicine* 2003;**96**:160-66
12. Hoffmann TC, Glasziou PP, Boutron I, et al. Better reporting of interventions: template for intervention description and replication (TIDieR) checklist and guide. *BMJ* 2014;**348** doi: 10.1136/bmj.g1687[published Online First: Epub Date]].
13. Sturgiss EA, Elmitt N, van Weel C, et al. The role of the family doctor in the management of adults who are obese: a scoping review protocol. *Springerplus* 2015;**4**:820 doi: 10.1186/s40064-015-1647-6[published Online First: Epub Date]].
14. Wadden TA, Volger S, Sarwer DB, et al. A two- year randomized trial of obesity treatment in primary care practice. *The New England Journal of Medicine* 2011;**365**(21):1969-79
15. Woolf S, Schünemann HJ, Eccles MP, et al. Developing clinical practice guidelines: types of evidence and outcomes; values and economics, synthesis, grading, and presentation and deriving recommendations. *Implementation Science* 2012;**7**(1):61 doi: 10.1186/1748-5908-7-61[published Online First: Epub Date]].
16. Ashley JM, St Jeor ST, Perumean-Chaney S, et al. Meal replacements in weight intervention. *Obesity research* 2001;**9 Suppl 4**:312s-20s doi: 10.1038/oby.2001.136[published Online First: Epub Date]].
17. Ashley JM, St Jeor ST, Schrage JP, et al. Weight control in the physician's office. *Archives of internal medicine* 2001;**161**(13):1599-604
18. A new evidence-based model for weight management in primary care: The Counterweight Programme. *Journal of Human Nutrition and Dietetics* 2004;**17**(3):191-208
19. The implementation of the Counterweight Programme in Scotland, UK. *Family Practice* 2012;**29**(Suppl 1):i139-i44 doi: 10.1093/fampra/cmz074[published Online First: Epub Date]].
20. Laws R. Current approaches to obesity management in UK Primary Care: the Counterweight Programme. *J Hum Nutr Diet* 2004;**17** doi: 10.1111/j.1365-277X.2004.00528.x[published Online First: Epub Date]].
21. Laws R. A new evidence-based model for weight management in primary care: the Counterweight Programme. *Hum Nutr Diet* 2004;**17** doi: 10.1111/j.1365-277X.2004.00517.x[published Online First: Epub Date]].
22. McQuigg M, Brown J, Broom J, et al. Empowering primary care to tackle the obesity epidemic: The Counterweight programme. *European Journal of Clinical Nutrition* 2005;**59**(SUPPL 1):S93-S101 doi: 10.1038/sj.ejcn.1602180[published Online First: Epub Date]].
23. McQuigg M, Brown JE, Broom J, et al. The Counterweight programme: Prevalence of CVD risk factors by body mass index and the impact of 10% weight change. *Obesity research & clinical practice* 2008;**2**(1):i-ii doi: 10.1016/j.orcp.2008.01.002[published Online First: Epub Date]].
24. McQuigg M, Brown JE, Broom JI, et al. Engaging patients, clinicians and health funders in weight management: the Counterweight Programme. *Fam Pract* 2008;**25 Suppl 1**:i79-86 doi: 10.1093/fampra/cmz081[published Online First: Epub Date]].
25. Bolognesi M, Nigg CR, Massarini M, et al. Reducing obesity indicators through brief physical activity counseling (PACE) in Italian primary care settings. *Annals of Behavioral Medicine* 2006;**31**(2):179-85
26. Bodenlos JS. Impact of a stage-matched weight loss intervention on stage of change progression in predominantly African-American female primary care patients. *Dissertation Abstracts International: Section B: The Sciences and Engineering* 2007;**67**(12-B):7364
27. Kerr J, Patrick K, Norman G, et al. Randomized control trial of a behavioral intervention for overweight women: Impact on depressive symptoms. *Depression and Anxiety* 2008;**25**(7):555-58
28. Bennett GG, Warner ET, Glasgow RE, et al. Obesity treatment for socioeconomically disadvantaged patients in primary care practice. *Archives of internal medicine* 2012;**172**(7):565-74 doi: 10.1001/archinternmed.2012.1[published Online First: Epub Date]].



- 1
- 2
- 3 29. Ritzwoller DP, Glasgow RE, Sukhanova AY, et al. Economic analyses of the be fit be well program:  
4 A weight loss program for community health centers. *Journal of General Internal Medicine*  
5 2013;**28**(12):1581-88 doi: 10.1007/s11606-013-2492-3[published Online First: Epub Date]].
- 6 30. Greaney ML, Quintiliani LM, Warner ET, et al. Weight management among patients at  
7 community health centers: The "Be Fit, Be Well" study. *Obesity and Weight Management*  
8 2009;**5**(5):222-28
- 9 31. Appel LJ, Clark JM, Yeh H-C, et al. Comparative effectiveness of weight-loss interventions in  
10 clinical practice. *The New England Journal of Medicine* 2011;**365**(21):1959-68
- 11 32. Bennett WL, Gudzone KA, Appel LJ, et al. Insights from the POWER practice-based weight loss  
12 trial: a focus group study on the PCP's role in weight management. *Journal of general*  
13 *internal medicine* 2014;**29**(1):50-58 doi: 10.1007/s11606-013-2562-6[published Online First:  
14 Epub Date]].
- 15 33. Bennett WL, Wang N-Y, Gudzone KA, et al. Satisfaction with primary care provider involvement is  
16 associated with greater weight loss: Results from the practice-based power trial. *Patient*  
17 *Education and Counseling* 2015:No Pagination Specified
- 18 34. Jerome GJ, Yeh H-C, Dalcin A, et al. Treatment of Obesity in Primary Care Practice: The Practice  
19 Based Opportunities for Weight Reduction (POWER) Trial at Johns Hopkins. *Obesity and*  
20 *Weight Management* 2009;**October**:216-21
- 21 35. Alfaris N, Wadden TA, Sarwer DB, et al. Effects of a 2-year behavioral weight loss intervention on  
22 sleep and mood in obese individuals treated in primary care practice. *Obesity*  
23 2015;**23**(3):558-64
- 24 36. Tsai AG, Wadden TA, Volger S, et al. Cost-effectiveness of a primary care intervention to treat  
25 obesity. *International journal of obesity (2005)* 2013;**37 Suppl 1**:S31-7 doi:  
26 10.1038/ijo.2013.94[published Online First: Epub Date]].
- 27 37. Sarwer D, Moore R, Diewald L, et al. The impact of a primary care-based weight loss intervention  
28 on the quality of life. *International Journal of Obesity* 2013;**37**(Suppl 1):S25-S30
- 29 38. Derbas J, Vetter M, Volger S, et al. Improving weight management in primary care practice: a  
30 possible role for auxiliary health professionals collaborating with primary care physicians.  
31 *Obesity and Weight Management* 2009;**5**:210-15
- 32 39. Volger S, Wadden TA, Sarwer DB, et al. Changes in eating, physical activity and related behaviors  
33 in a primary care-based weight loss intervention. *International journal of obesity (2005)*  
34 2013;**37 Suppl 1**:S12-8 doi: 10.1038/ijo.2013.91[published Online First: Epub Date]].
- 35 40. Vetter ML, Wadden TA, Chittams J, et al. Effect of lifestyle intervention on cardiometabolic risk  
36 factors: results of the POWER-UP trial. *International journal of obesity (2005)* 2013;**37 Suppl**  
37 **1**:S19-24 doi: 10.1038/ijo.2013.92[published Online First: Epub Date]].
- 38 41. Wadden TA, Volger S, Tsai AG, et al. Managing obesity in primary care practice: an overview with  
39 perspective from the POWER-UP study. *International journal of obesity (2005)* 2013;**37**  
40 **Suppl 1**:S3-11 doi: 10.1038/ijo.2013.90[published Online First: Epub Date]].
- 41 42. Tsai AG, Wadden TA, Rogers MA, et al. A primary care intervention for weight loss: Results of a  
42 randomized controlled pilot study. *Obesity* 2010;**18**(8):1614-18
- 43 43. Banerjee ES, Gambler A, Fogleman C. Adding obesity to the problem list increases the rate of  
44 providers addressing obesity. *Family medicine* 2013;**45**(9):629-33
- 45 44. Blonstein AC, Yank V, Stafford RS, et al. Translating an evidence-based lifestyle intervention  
46 program into primary care: Lessons learned. *Health Promotion Practice* 2013;**14**(4):491-97
- 47 45. Barnes ER, Theeke LA, Mallow J. Impact of the provider and healthcare team Adherence to  
48 Treatment Guidelines (PHAT-G) intervention on adherence to national obesity clinical  
49 practice guidelines in a primary care centre. *Journal of Evaluation in Clinical Practice*  
50 2015;**21**(2):300-06
- 51 46. Booth AO, Nowson CA, Huang N, et al. Evaluation of a brief pilot nutrition and exercise  
52 intervention for the prevention of weight gain in general practice patients. *Public Health*  
53 *Nutrition* 2006;**9**(8):1055-61 doi: 10.1017/PHN2006980[published Online First: Epub Date]].
- 54
- 55
- 56
- 57
- 58
- 59

- 1
- 2
- 3 47. Bordowitz R, Morland K, Reich D. The use of an electronic medical record to improve
- 4 documentation and treatment of obesity. *Family medicine* 2007;**39**(4):274-9
- 5 48. Bowerman S, Bellman M, Saltsman P, et al. Implementation of a primary care physician network
- 6 obesity management program. *Obesity research* 2001;**9 Suppl 4**:321S-25S
- 7 49. Clark D, Chrysler L, Perkins A, et al. Screening, referral, and participation in a weight
- 8 management program implemented in five CHCs. *Journal of Health Care for the Poor and*
- 9 *Underserved* 2010;**21**(2):617-28
- 10 50. Clark DO, Keith N, Chrysler L, et al. Design and reach of a primary care weight management
- 11 program. *Journal of Health Care for the Poor and Underserved* 2008;**19**(1):171-79
- 12 51. Coupar AM, Kennedy T. Running a weight control group: experiences of a psychologist and a
- 13 general practitioner. *Journal of the Royal College of General Practitioners* 1980;**30**(210):41-
- 14 48
- 15 52. Cutler L, King B, McCarthy N, et al. Appetite for life: An evaluation of a primary care lifestyle
- 16 programme. *Journal of Primary Health Care* 2010;**2**(4):281-87
- 17 53. Doering T, Harwell S, Fassler C, et al. An interventional pilot study on obesity among low-income
- 18 patients using a computer-based weight management module. *Journal of community*
- 19 *hospital internal medicine perspectives* 2013;**3**(1) doi: 10.3402/jchimp.v3i1.20072[published
- 20 Online First: Epub Date]].
- 21 54. Dutton GR, Phillips JM, Kukkamalla M, et al. Pilot study evaluating the feasibility and initial
- 22 outcomes of a primary care weight loss intervention with peer coaches. *The Diabetes*
- 23 *Educator* 2015;**41**(3):361-68
- 24 55. Eichler K, Zoller M, Steurer J, et al. Cognitive-behavioural treatment for weight loss in primary
- 25 care: A prospective study. *Swiss Medical Weekly* 2007;**137**(35-36):489-95
- 26 56. Ely AC, Banitt A, Befort C, et al. Kansas primary care weighs in: A pilot randomized trial of a
- 27 chronic care model program for obesity in 3 rural Kansas primary care practices. *The Journal*
- 28 *of Rural Health* 2008;**24**(2):125-32
- 29 57. Feigenbaum A, Pasternak S, Zusk E, et al. Influence of intense multidisciplinary follow-up and
- 30 orlistat on weight reduction in a primary care setting. *BMC Family Practice* 2005;**6**:
- 31 10.1186/1471-2296-6-5[published Online First: Epub Date]].
- 32 58. Kanke S, Kawai T, Takasawa N, et al. Interventions for body weight reduction in obese patients
- 33 during short consultations: An open-label randomized controlled trial in the Japanese
- 34 primary care setting. *Asia Pacific Family Medicine* 2015 doi: 10.1186/s12930-015-0022-
- 35 7[published Online First: Epub Date]].
- 36 59. Fuller NR, Colagiuri S, Schofield D, et al. A within-trial cost-effectiveness analysis of primary care
- 37 referral to a commercial provider for weight loss treatment, relative to standard care-an
- 38 international randomised controlled trial. *International Journal of Obesity* 2013;**37**(6):828-34
- 39 doi: 10.1038/ijo.2012.139[published Online First: Epub Date]].
- 40 60. Holzapfel C, Cresswell L, Ahern AL, et al. The challenge of a 2-year follow-up after intervention
- 41 for weight loss in primary care. *International journal of obesity (2005)* 2014;**38**(6):806-11
- 42 doi: 10.1038/ijo.2013.180[published Online First: Epub Date]].
- 43 61. Jebb SA, Ahern AL, Olson AD, et al. Primary care referral to a commercial provider for weight loss
- 44 treatment versus standard care: a randomised controlled trial. *The Lancet*
- 45 2011;**378**(9801):1485-92 doi: 10.1016/s0140-6736(11)61344-5[published Online First: Epub
- 46 Date]].
- 47 62. Huerta S, Li Z, Li HC, et al. Feasibility of a partial meal replacement plan for weight loss in low-
- 48 income patients. *International Journal of Obesity* 2004;**28**(12):1575-79 doi:
- 49 10.1038/sj.ijo.0802792[published Online First: Epub Date]].
- 50 63. Garies S, Irving A, Williamson T, et al. Using EMR data to evaluate a physician-developed lifestyle
- 51 plan for obese patients in primary care. *Canadian Family Physician* 2015;**61**(5):e225-e31
- 52 64. Gusi N, Reyes MC, Gonzalez-Guerrero JL, et al. Cost-utility of a walking programme for
- 53 moderately depressed, obese, or overweight elderly women in primary care: A randomised
- 54
- 55
- 56
- 57
- 58
- 59
- 60



- controlled trial. BMC Public Health 2008;**8** doi: 10.1186/1471-2458-8-231[published Online First: Epub Date]].
65. Haas WC, Moore JB, Kaplan M, et al. Outcomes from a medical weight loss program: Primary care clinics versus weight loss clinics. American Journal of Medicine 2012;**125**(6):603.e7-03.e11 doi: 10.1016/j.amjmed.2011.07.039[published Online First: Epub Date]].
66. Crawford-Faucher A. Which weight-loss programs are most effective? American Family Physician 2012;**86**(3):280-82
67. Jolly K, Daley A, Adab P, et al. A randomised controlled trial to compare a range of commercial or primary care led weight reduction programmes with a minimal intervention control for weight loss in obesity: The Lighten Up trial. BMC Public Health 2010;**10** doi: 10.1186/1471-2458-10-439[published Online First: Epub Date]].
68. Jolly K, Lewis A, Beach J, et al. Comparison of range of commercial or primary care led weight reduction programmes with minimal intervention control for weight loss in obesity: lighten Up randomised controlled trial. BMJ 2011;**343**:d6500 doi: 10.1136/bmj.d6500[published Online First: Epub Date]].
69. Hauner H, Meier M, Wendland G, et al. Weight reduction by sibutramine in obese subjects in primary care medicine: The S.A.T. study. Experimental and Clinical Endocrinology and Diabetes 2004;**112**(4):201-07 doi: 10.1055/s-2004-817934[published Online First: Epub Date]].
70. Hoke CN, Franks S. Work site, physician's office, or medical university clinic: The effect of setting on success in a multidisciplinary weight-loss program. Eating Behaviors 2002;**3**(1):93-100 doi: 10.1016/S1471-0153(01)00053-8[published Online First: Epub Date]].
71. Kumanyika S, Fassbender J, Phipps E, et al. Design, recruitment and start up of a primary care weight loss trial targeting African American and Hispanic adults. Contemporary clinical trials 2011;**32**(2):215-24 doi: 10.1016/j.cct.2010.11.002[published Online First: Epub Date]].
72. Kumanyika SK, Fassbender JE, Sarwer DB, et al. One-year results of the Think Health! study of weight management in primary care practices. Obesity (Silver Spring, Md) 2012;**20**(6):1249-57 doi: 10.1038/oby.2011.329[published Online First: Epub Date]].
73. Kuppersmith NC, Miles TP. Effect of a BMI chart on weight management discussions in a primary care setting. The Journal of the Kentucky Medical Association 2006;**104**(11):519-22
74. Laing BY, Mangione CM, Tseng CH, et al. Effectiveness of a smartphone application for weight loss compared with usual care in overweight primary care patients: a randomized, controlled trial. Annals of internal medicine 2014;**161**(10 Suppl):S5-12 doi: 10.7326/m13-3005[published Online First: Epub Date]].
75. Lewis A, Jolly K, Adab P, et al. A brief intervention for weight management in primary care: Study protocol for a randomized controlled trial. Trials 2013;**14**(1) doi: 10.1186/1745-6215-14-393[published Online First: Epub Date]].
76. Logue E, Sutton K, Jarjoura D, et al. Obesity management in primary care: assessment of readiness to change among 284 family practice patients. The Journal of the American Board of Family Practice / American Board of Family Practice 2000;**13**(3):164-71
77. Logue E, Sutton K, Jarjoura D, et al. Transtheoretical Model-Chronic Disease Care for Obesity in Primary Care: A Randomized Trial. Obesity research 2005;**13**(5):917-27
78. Logue EE, Bourguet CC, Palmieri PA, et al. The better weight-better sleep study: A pilot intervention in primary care. American Journal of Health Behavior 2012;**36**(3):319-34
79. Lowe MR, Butryn ML, Thomas J, et al. Meal replacements, reduced energy density eating, and weight loss maintenance in primary care patients: A randomized controlled trial. Obesity 2014;**22**(1):94-100
80. Madigan CD, Jolly K, Lewis AL, et al. A randomised controlled trial of the effectiveness of self-weighting as a weight loss intervention. The International Journal of Behavioral Nutrition and Physical Activity Vol 11 Oct 2014, ArtID 125 2014;**11**

- 1  
2  
3 81. Davis Martin P, Rhode PC, Dutton GR, et al. A primary care weight management intervention for  
4 low-income African-American women. *Obesity (Silver Spring, Md)* 2006;**14**(8):1412-20 doi:  
5 10.1038/oby.2006.160[published Online First: Epub Date]].
- 6 82. Martin PD, Dutton GR, Rhode PC, et al. Weight loss maintenance following a primary care  
7 intervention for low-income minority women. *Obesity (Silver Spring, Md)* 2008;**16**(11):2462-  
8 7 doi: 10.1038/oby.2008.399[published Online First: Epub Date]].
- 9 83. McDoniel SO, Wolskee P, Shen J. Treating obesity with a novel hand-held device, computer  
10 software program, and Internet technology in primary care: The SMART motivational trial.  
11 *Patient Education and Counseling* 2010;**79**(2):185-91
- 12 84. McDoniel S. The short-term effect of a technology based comprehensive weight reduction  
13 program for obese adults in a primary care medical clinic: A three month psychobehavioral  
14 study, 2008.
- 15 85. Mehring M, Haag M, Linde K, et al. Effects of a general practice guided web-based weight  
16 reduction program - Results of a cluster-randomized controlled trial. *BMC Family Practice*  
17 2013;**14** doi: 10.1186/1471-2296-14-76[published Online First: Epub Date]].
- 18 86. Munsch S, Biedert E, Keller U. Evaluation of a lifestyle change programme for the treatment of  
19 obesity in general practice. *Swiss Med Wkly* 2003;**133**(9-10):148-54 doi: 2003/09/smw-  
20 10109[published Online First: Epub Date]].
- 21 87. O'Grady JS, Thacher TD, Chaudhry R. The effect of an automated clinical reminder on weight loss  
22 in primary care. *Journal of the American Board of Family Medicine : JABFM* 2013;**26**(6):745-  
23 50 doi: 10.3122/jabfm.2013.06.120340[published Online First: Epub Date]].
- 24 88. Olsen J, Willaing I, Ladelund S, et al. Cost-effectiveness of nutritional counseling for obese  
25 patients and patients at risk of ischemic heart disease. *International Journal of Technology*  
26 *Assessment in Health Care* 2005;**21**(2):194-202
- 27 89. Pellegrini CA, Hoffman SA, Collins LM, et al. Optimization of remotely delivered intensive lifestyle  
28 treatment for obesity using the Multiphase Optimization Strategy: Opt-IN study protocol.  
29 *Contemporary clinical trials* 2014;**38**(2):251-59 doi: 10.1016/j.cct.2014.05.007[published  
30 Online First: Epub Date]].
- 31 90. Richman RM, Webster P, Salgo AR, et al. A shared care approach in obesity management: the  
32 general practitioner and a hospital based service. *International journal of obesity and related*  
33 *metabolic disorders : journal of the International Association for the Study of Obesity*  
34 1996;**20**(5):413-9
- 35 91. Ross R, Lam M, Blair SN, et al. Trial of prevention and reduction of obesity through active living in  
36 clinical settings: a randomized controlled trial. *Archives of internal medicine*  
37 2012;**172**(5):414-24 doi: 10.1001/archinternmed.2011.1972[published Online First: Epub  
38 Date]].
- 39 92. Ross R, Blair SN, Godwin M, et al. Prevention and Reduction of Obesity through Active Living  
40 (PROACTIVE): rationale, design and methods. *British journal of sports medicine*  
41 2009;**43**(1):57-63 doi: 10.1136/bjsm.2008.053504[published Online First: Epub Date]].
- 42 93. Rutten GM, Meis JJ, Hendriks MR, et al. The contribution of lifestyle coaching of overweight  
43 patients in primary care to more autonomous motivation for physical activity and healthy  
44 dietary behaviour: Results of a longitudinal study. *The International Journal of Behavioral*  
45 *Nutrition and Physical Activity* Vol 11 Jul 2014, ArtID 86 2014;**11**
- 46 94. Saris WHM, Koenders MC, Pannemans DLE, et al. Outcome of a multicenter outpatient weight-  
47 management program including very-low-calorie diet and exercise. *American Journal of*  
48 *Clinical Nutrition* 1992;**56**(SUPPL. 1):294S-96S
- 49 95. Stephens GS, Blanken SE, Greiner KA, et al. Visual prompt poster for promoting patient-physician  
50 conversations on weight loss. *Annals of Family Medicine* 2008;**6**(SUPPL. 1):S33-S36 doi:  
51 10.1370/afm.780[published Online First: Epub Date]].
- 52  
53  
54  
55  
56  
57  
58  
59

- 1  
2  
3 96. Driehuis F, Barte JC, Ter Bogt NC, et al. Maintenance of lifestyle changes: 3-year results of the  
4 Groningen Overweight and Lifestyle study. *Patient Educ Couns* 2012;**88**(2):249-55 doi:  
5 10.1016/j.pec.2012.03.017[published Online First: Epub Date]].
- 6 97. Barte JC, ter Bogt NC, Beltman FW, et al. Process evaluation of a lifestyle intervention in primary  
7 care: implementation issues and the participants' satisfaction of the GOAL study. *Health*  
8 *education & behavior* : the official publication of the Society for Public Health Education  
9 2012;**39**(5):564-73 doi: 10.1177/1090198111422936[published Online First: Epub Date]].
- 10 98. ter Bogt NC, Bemelmans WJ, Beltman FW, et al. Preventing weight gain: one-year results of a  
11 randomized lifestyle intervention. *American journal of preventive medicine* 2009;**37**(4):270-  
12 7 doi: 10.1016/j.amepre.2009.06.011[published Online First: Epub Date]].
- 13 99. ter Bogt NC, Bemelmans WJ, Beltman FW, et al. Preventing weight gain by lifestyle intervention  
14 in a general practice setting: three-year results of a randomized controlled trial. *Archives of*  
15 *internal medicine* 2011;**171**(4):306-13 doi: 10.1001/archinternmed.2011.22[published  
16 Online First: Epub Date]].
- 17 100. ter Bogt NC, Milder IE, Bemelmans WJ, et al. Changes in lifestyle habits after counselling by  
18 nurse practitioners: 1-year results of the Groningen Overweight and Lifestyle study. *Public*  
19 *Health Nutr* 2011;**14**(6):995-1000 doi: 10.1017/s1368980010003708[published Online First:  
20 Epub Date]].
- 21 101. Thomas JG, Leahey TM, Wing RR. An automated internet behavioral weight-loss program by  
22 physician referral: a randomized controlled trial. *Diabetes care* 2015;**38**(1):9-15 doi:  
23 10.2337/dc14-1474[published Online First: Epub Date]].
- 24 102. Toth-Capelli KM, Brawer R, Plumb J, et al. Stage of change and other predictors of participant  
25 retention in a behavioral weight management program in primary care. *Health Promotion*  
26 *Practice* 2013;**14**(3):441-50
- 27 103. Tsai AG, Felton S, Hill JO, et al. A randomized pilot trial of a full subsidy vs. a partial subsidy for  
28 obesity treatment. *Obesity* 2012;**20**(9):1838-43
- 29 104. Wadden TA, Berkowitz RI, Womble LG, et al. Randomized Trial of Lifestyle Modification and  
30 Pharmacotherapy for Obesity. *The New England Journal of Medicine* 2005;**353**(20):2111-20
- 31 105. Wilson DB, Johnson RE, Jones RM, et al. Patient weight counseling choices and outcomes  
32 following a primary care and community collaborative intervention. *Patient Education and*  
33 *Counseling* 2010;**79**(3):338-43
- 34 106. Wirth A. Reduction of body weight and co-morbidities by orlistat: The XXL - Primary health care  
35 trial. *Diabetes, Obesity and Metabolism* 2005;**7**(1):21-27 doi: 10.1111/j.1463-  
36 1326.2004.00428.x[published Online First: Epub Date]].
- 37 107. Yardley L, Ware LJ, Smith ER, et al. Randomised controlled feasibility trial of a web-based weight  
38 management intervention with nurse support for obese patients in primary care. *The*  
39 *International Journal of Behavioral Nutrition and Physical Activity* Vol 11 May 2014, ArtID 67  
40 2014;**11**
- 41 108. Tsai AG, Felton S, Wadden TA, et al. A randomized clinical trial of a weight loss maintenance  
42 intervention in a primary care population. *Obesity (Silver Spring, Md)* 2015;**23**(10):2015-21  
43 doi: 10.1002/oby.21224[published Online First: Epub Date]].
- 44 109. Ryan DH, Johnson WD, Myers VH, et al. Nonsurgical weight loss for extreme obesity in primary  
45 care settings: results of the Louisiana Obese Subjects Study. *Archives of internal medicine*  
46 2010;**170**(2):146-54 doi: 10.1001/archinternmed.2009.508[published Online First: Epub  
47 Date]].
- 48 110. Baillargeon JP, Carpentier A, Donovan D, et al. Integrated obesity care management system -  
49 implementation and research protocol. *BMC health services research* 2007;**7**:163 doi:  
50 10.1186/1472-6963-7-163[published Online First: Epub Date]].
- 51 111. Baillargeon JP, St-Cyr-Tribble D, Xhignesse M, et al. Impact of an integrated obesity  
52 management system on patient's care - research protocol. *BMC obesity* 2014;**1**:19 doi:  
53 10.1186/s40608-014-0019-z[published Online First: Epub Date]].
- 54  
55  
56  
57  
58  
59

- 1  
2  
3 112. Katz S, Feigenbaum A, Pasternak S, et al. An interactive course to enhance self-efficacy of family  
4 practitioners to treat obesity. *BMC medical education* 2005;**5**(1):4 doi: 10.1186/1472-6920-  
5 5-4[published Online First: Epub Date]].
- 6 113. Buclin-Thiebaud S, Pataky Z, Bruchez V, et al. New psycho-pedagogic approach to obesity  
7 treatment: a 5-year follow-up. *Patient Educ Couns* 2010;**79**(3):333-7 doi:  
8 10.1016/j.pec.2009.11.001[published Online First: Epub Date]].
- 9 114. Feuerstein JS, Takayasu K, Maltz A, et al. Teaching a lifestyle intervention for reversing impaired  
10 fasting glucose, hyperlipidemia and obesity/overweight to a cohort of local physicians.  
11 *Current Nutrition and Food Science* 2015;**11**(1):65-69
- 12 115. Hartman SJ, Risica PM, Gans KM, et al. Tailored weight loss intervention in obese adults within  
13 primary care practice: Rationale, design, and methods of Choose to Lose. *Contemporary*  
14 *clinical trials* 2014;**38**(2):409-19 doi: 10.1016/j.cct.2014.06.001[published Online First: Epub  
15 Date]].
- 16 116. Lin M, Mahmooth Z, Dedhia N, et al. Tailored, interactive text messages for enhancing weight  
17 loss among African American adults: the TRIMM randomized controlled trial. *The American*  
18 *journal of medicine* 2015;**128**(8):896-904 doi: 10.1016/j.amjmed.2015.03.013[published  
19 Online First: Epub Date]].
- 20 117. Moore H, Summerbell CD, Greenwood DC, et al. Improving management of obesity in primary  
21 care: cluster randomised trial. *Bmj* 2003;**327**(7423):1085 doi:  
22 10.1136/bmj.327.7423.1085[published Online First: Epub Date]].
- 23 118. Rodondi N, Humair JP, Ghali WA, et al. Counselling overweight and obese patients in primary  
24 care: a prospective cohort study. *European journal of cardiovascular prevention and*  
25 *rehabilitation : official journal of the European Society of Cardiology, Working Groups on*  
26 *Epidemiology & Prevention and Cardiac Rehabilitation and Exercise Physiology*  
27 2006;**13**(2):222-8 doi: 10.1097/01.hjr.0000209819.13196.a4[published Online First: Epub  
28 Date]].
- 29 119. Rueda-Clausen CF, Benterud E, Bond T, et al. Effect of implementing the 5As of Obesity  
30 Management framework on provider-patient interactions in primary care. *Clinical Obesity*  
31 2014;**4**(1):39-44 doi: 10.1111/cob.12038[published Online First: Epub Date]].
- 32 120. Schuster RJ, Tasosa J, Terwoord NA. Translational research--implementation of NHLBI Obesity  
33 Guidelines in a primary care community setting: the Physician Obesity Awareness Project.  
34 *The journal of nutrition, health & aging* 2008;**12**(10):764s-69s
- 35 121. Yank V, Stafford RS, Rosas LG, et al. Baseline reach and adoption characteristics in a randomized  
36 controlled trial of two weight loss interventions translated into primary care: a structured  
37 report of real-world applicability. *Contemporary clinical trials* 2013;**34**(1):126-35 doi:  
38 10.1016/j.cct.2012.10.007[published Online First: Epub Date]].
- 39 122. Goodyear-Smith F, McPhee J, Duncan S, et al. Evaluation of a primary care-based programme  
40 designed to increase exercise and improve nutrition in patients at risk. *J Prim Health Care*  
41 2014;**6**(4):312-8
- 42 123. Jay MR, Gillespie CC, Schlair SL, et al. The impact of primary care resident physician training on  
43 patient weight loss at 12 months. *Obesity (Silver Spring, Md)* 2013;**21**(1):45-50 doi:  
44 10.1002/oby.20237[published Online First: Epub Date]].
- 45 124. Wadden TA, Berkowitz RI, Vogt RA, et al. Lifestyle Modification in the Pharmacologic Treatment  
46 of Obesity: A Pilot Investigation of a Potential Primary Care Approach. *Obesity research*  
47 1997;**5**(3):218-26
- 48 125. Anderson DA, Wadden TA. Treating the obese patient. Suggestions for primary care practice.  
49 *Archives of family medicine* 1999;**8**(2):156-67
- 50 126. Rao G. Office-based strategies for the management of obesity. *Am Fam Physician*  
51 2010;**81**(12):1449-56 ; quiz 29
- 52 127. Simkin-Silverman LR, Conroy MB, King WC. Treatment of Overweight and Obesity in Primary  
53 Care Practice: Current Evidence and Future Directions. *American Journal of Lifestyle*  
54  
55  
56  
57  
58  
59

- 1  
2  
3 Medicine 2008;**2**(4):296-304 doi: 10.1177/1559827608317287[published Online First: Epub  
4 Date]].
- 5 128. Logue EE, Smucker WD. Obesity management in primary care: changing the status quo. The  
6 Journal of family practice 2001;**50**(6):520
- 7 129. Lyznicki JM, Young DC, Riggs JA, et al. Obesity: assessment and management in primary care.  
8 Am Fam Physician 2001;**63**(11):2185-96
- 9 130. Sherman R, Crocker B, Dill D, et al. Health coaching integration into primary care for the  
10 treatment of obesity. Global advances in health and medicine : improving healthcare  
11 outcomes worldwide 2013;**2**(4):58-60 doi: 10.7453/gahmj.2013.017[published Online First:  
12 Epub Date]].
- 13 131. Vallis M, Piccinini-Vallis H, Sharma AM, et al. Modified 5 As: Minimal intervention for obesity  
14 counseling in primary care. Canadian Family Physician 2013;**59**(1):27-31+e1-e5
- 15 132. Benotti P. *Patient Preparation for Bariatric Surgery*. USA: Springer, 2014.
- 16 133. Brown W, Korin A, Burton P, et al. Laparoscopic adjustable gastric banding. Australian family  
17 physician 2009;**38**(12):972-6
- 18 134. Choban PS, Jackson B, Poplawski S, et al. Bariatric surgery for morbid obesity: why, who, when,  
19 how, where, and then what? Cleveland Clinic journal of medicine 2002;**69**(11):897-903
- 20 135. DeMaria EJ. Bariatric Surgery for Morbid Obesity. New England Journal of Medicine  
21 2007;**356**(21):2176-83 doi: doi:10.1056/NEJMct067019[published Online First: Epub Date]].
- 22 136. Dixon JB. Referral for a bariatric surgical consultation: it is time to set a standard of care.  
23 Obesity surgery 2009;**19**(5):641-4 doi: 10.1007/s11695-008-9765-7[published Online First:  
24 Epub Date]].
- 25 137. Heber D, Greenway FL, Kaplan LM, et al. Endocrine and nutritional management of the post-  
26 bariatric surgery patient: an Endocrine Society Clinical Practice Guideline. The Journal of  
27 clinical endocrinology and metabolism 2010;**95**(11):4823-43 doi: 10.1210/jc.2009-  
28 2128[published Online First: Epub Date]].
- 29 138. Karmali S, Johnson Stoklossa C, Sharma A, et al. Bariatric surgery: a primer. Canadian family  
30 physician Medecin de famille canadien 2010;**56**(9):873-9
- 31 139. Pietras SM, Usdan LS, Apovian CM. Preoperative and Postoperative Management of the  
32 Bariatric Surgical Patient. JCOM 2007 **14**(5):262-74
- 33 140. Richardson LA. Bariatric society is here to help. The Journal of family practice 2010;**59**(9):488
- 34 141. Shafipour P, Der-Sarkissian JK, Hendee FN, et al. What Do I Do with My Morbidly Obese Patient?  
35 A Detailed Case Study of Bariatric Surgery in Kaiser Permanente Southern California. The  
36 Permanente Journal 2009;**13**(4):56-63
- 37 142. Snow V, Barry P, Fitterman N, et al. Pharmacologic and Surgical Management of Obesity in  
38 Primary Care: A Clinical Practice Guideline from the American College of Physicians. Annals  
39 of internal medicine 2005;**142**(7):525-31
- 40 143. Van Sickle KR. Management of the challenging bariatric surgical patient. The Medical clinics of  
41 North America 2007;**91**(3):383-92, x doi: 10.1016/j.mcna.2007.02.003[published Online  
42 First: Epub Date]].
- 43 144. Virji A, Murr MM. Caring for Patients After Bariatric Surgery. American Family Physician  
44 2006;**73**(8):1403-08
- 45 145. Wilbert B, Shaw V, Andres A. Appetite Suppressants as Adjuncts for Weight Loss. American  
46 Family Physician 2011;**83**(7):1-2
- 47 146. Kolasa KM, Collier DN, Cable K. Weight loss strategies that really work. The Journal of family  
48 practice 2010;**59**(7):378-85
- 49 147. Mercer S. How useful are clinical guidelines for the management of obesity in general practice?  
50 The British journal of general practice : the journal of the Royal College of General  
51 Practitioners 2009;**59**(568):863-8 doi: 10.3399/bjgp09X472917[published Online First: Epub  
52 Date]].
- 53  
54  
55  
56  
57  
58  
59



148. Agency NHD. *Care pathways for the prevention and management of obesity*. London, UK: Health Development Agency, 2004.
149. Agrawal M, Worzniak M, Diamond L. Managing obesity like any other chronic condition. Long-term therapy may reduce comorbidity as well. *Postgraduate Medical Journal* 2000;**108**(1):75-82
150. Brunton SA, Skolnik NS, Ryan DH, et al. Management of obesity in adults. *The Journal of family practice* 2014;**63**(7):S1-S33
151. Bartlett S. Motivating patients toward weight loss: practical strategies for addressing overweight and obesity. *The Physician and Sportsmedicine* 2003;**31**(11):29-36
152. Benjamin RM, Yanovski SZ, Simons-Morton DG. Can primary care physician-driven community programs address the obesity epidemic among high-risk populations? *JAMA internal medicine* 2013;**173**(19):1778-9 doi: 10.1001/jamainternmed.2013.7776[published Online First: Epub Date]].
153. Birmingham CL, Jones P, Hoffer LJ. The management of adult obesity. *Eating and Weight Disorders* 2003;**8**:157-63
154. Caulfield T. Obesity, legal duties, and the family physician. *Canadian family physician Medecin de famille canadien* 2007;**53**:1129-30
155. Cerveny R. Approaching the obese patients in primary health care in the Czech Republic. *Bratislavské lekárske listy* 2007;**108**(9):425-27
156. Fitzpatrick SL, Wischenka D, Appelhans BM, et al. An Evidence-based Guide for Obesity Treatment in Primary Care. *The American journal of medicine* 2016;**129**(1):115 e1-7 doi: 10.1016/j.amjmed.2015.07.015[published Online First: Epub Date]].
157. Frank A. A multidisciplinary approach to obesity management: The physician's role and team care alternatives. *American Dietetic Association* 1998;**98**(10 supp 2):S44-48
158. Gandjour A. Development process of an evidence-based guideline for the treatment of obesity. *International Journal for Quality in Health Care* 2001;**13**(4):325-32 doi: 10.1093/intqhc/13.4.325[published Online First: Epub Date]].
159. Grief S. Strategies to Facilitate Weight Loss in Patients Who Are Obese. *Am Fam Physician* 2010;**82**(12):1434
160. Grima M, Dixon J. Obesity: Recommendations for management in general practice and beyond. *Australian family physician* 2013;**42**(8):532-41
161. Hagaman M. FP's patients are successful "losers". *The Journal of family practice* 2010;**59**(9):488
162. Hill J. Dealing With Obesity as a Chronic Disease. *Obesity research* 1998;**6**(supp 1):34S - 38S
163. Hill JO, Wyatt H. Outpatient Management of Obesity: A Primary Care Perspective. *Obesity research* 2002;**10**(supp 2):124S-30S
164. Iacobucci G. Pay GPs to tackle obesity, doctors urge UK government. *BMJ* 2014;**348**:g232 doi: 10.1136/bmj.g232[published Online First: Epub Date]].
165. Kausman R, Bruere T. If not dieting, now what? *Australian family physician* 2006;**35**(8):572-75
166. Kolasa K. Summary of clinical guidelines on the identification, evaluation, and treatment of overweight and obesity. *Journal of Nutrition Education* 1999;**31**(2):114
167. Kushner R. Tackling obesity: Is primary care up to the challenge? *Archives of internal medicine* 2010;**170**(2):121-23
168. Landau C, Moulton A. General principles in the primary care of obesity. *Rhode Island Medicine* 1992;**75**(11):527-30
169. Lenfant C. Physicians Need Practical Tools to Treat the Complex Problems of Overweight and Obesity. *American Family Physician* 2001;**63**(11):2139-46
170. Maryon-Davis A. Weight management in primary care: how can it be made more effective? *The Proceedings of the Nutrition Society* 2005;**64**(1):97-103
171. Mogul H, Rau J, Weinstein B, et al. New perspectives on diagnosis and treatment of obesity. *Heart Disease* 1999;**1**(5):295-304

- 1  
2  
3 172. Newton RL, Milsom VA, Nackers LM, et al. Supporting Behavior Change in Overweight Patients:  
4 A Guide for the Primary Care Physician. *JCOM* 2007;**15**(11):536-44
- 5 173. Nichols J, Bazemore A. Winnable battles: family physicians play an essential role in addressing  
6 tobacco use and obesity. *Am Fam Physician* 2014;**89**(11):872
- 7 174. Nonas CA. A model for chronic care of obesity through dietary treatment. *Journal of the*  
8 *American Dietetic Association* 1998;**98**(10 Suppl 2):S16-22
- 9 175. Orzano AJ, Scott JG. Diagnosis and treatment of obesity in adults: an applied evidence-based  
10 review. *The Journal of the American Board of Family Practice / American Board of Family*  
11 *Practice* 2004;**17**(5):359-69
- 12 176. Ossolinski G, Jiwa M, McManus A. Weight management practices and evidence for weight loss  
13 through primary care: a brief review. *Current medical research and opinion*  
14 2015;**31**(11):2011-20 doi: 10.1185/03007995.2015.1082993[published Online First: Epub  
15 Date]].
- 16 177. Plourde G, Prud'homme D. Managing obesity in adults in primary care. *CMAJ : Canadian*  
17 *Medical Association Journal* 2012;**184**(9):1039-44 doi: 10.1503/cmaj.111640[published  
18 Online First: Epub Date]].
- 19 178. Rao G, Burke LE, Spring BJ, et al. New and emerging weight management strategies for busy  
20 ambulatory settings: a scientific statement from the American Heart Association endorsed  
21 by the Society of Behavioral Medicine. *Circulation* 2011;**124**(10):1182-203 doi:  
22 10.1161/CIR.0b013e31822b9543[published Online First: Epub Date]].
- 23 179. Robinson BE, Gjerdingen DK, Houge DR. Obesity: a move from traditional to more patient-  
24 oriented management. *The Journal of the American Board of Family Practice / American*  
25 *Board of Family Practice* 1995;**8**(2):99-108
- 26 180. Ruser CB, Federman DG, Kashaf SS. Whittling away at obesity and overweight. *Small lifestyle*  
27 *changes can have the biggest impact. Postgraduate medicine* 2005;**117**(1):31-4, 37-40
- 28 181. Scherger J. Primary care physicians: On the front line in the fight against obesity. *Cardiovascular*  
29 *reviews and reports* 1999;**20**(5):268-70
- 30 182. Schlair S, Moore S, McMacken M, et al. How to Deliver High-Quality Obesity Counseling in  
31 Primary Care Using the 5As Framework. *JCOM* 2012;**19**(5):221-29
- 32 183. Spira M. Managing obesity in general practice. *The Practitioner* 1983;**227**(1378):625-9
- 33 184. Thompson WG, Cook DA, Clark MM, et al. Treatment of obesity. *Mayo Clinic proceedings*  
34 2007;**82**(1):93-101; quiz 01-2 doi: 10.4065/82.1.93[published Online First: Epub Date]].
- 35 185. Tsai AG, Carvajal R, Egner R, et al. Obesity. In: DiTomasso R, Golden B, Morris H, eds. *Handbook*  
36 *of cognitive behavioral approaches in primary care*. New York: Springer Publishing Company,  
37 2010:595-630.
- 38 186. Yanovski SZ. A practical approach to treatment of the obese patient. *Archives of family*  
39 *medicine* 1993;**2**(3):309-16
- 40 187. Association AM. *Your Family Doctor – Keeping You Healthy; AMA FAMILY DOCTOR WEEK, 20-26*  
41 *July 2014. Australia, 2014.*
- 42 188. Zwar N, Harris M. *Are GPs doing enough to help patients lose weight? The Conversation.*  
43 *Australia: The Conversation, 2013.*
- 44 189. Hainer V. How should the obese patient be managed? Possible approaches to a national obesity  
45 management network. *International journal of obesity and related metabolic disorders :*  
46 *journal of the International Association for the Study of Obesity* 1999;**23** **Suppl 4**:S14-8;  
47 discussion S18-9
- 48 190. Seidell JC, Halberstadt J, Noordam H, et al. An integrated health care standard for the  
49 management and prevention of obesity in The Netherlands. *Fam Pract* 2012;**29** **Suppl 1**:i153-  
50 i56 doi: 10.1093/fampra/cmr057[published Online First: Epub Date]].
- 51 191. Anderson P. Reducing overweight and obesity: closing the gap between primary care and public  
52 health. *Fam Pract* 2008;**25** **Suppl 1**:i10-6 doi: 10.1093/fampra/cmn060[published Online  
53 First: Epub Date]].
- 54  
55  
56  
57  
58  
59

- 1  
2  
3 192. Jarvis S. Obesity and the overworked GP. *The British journal of general practice : the journal of*  
4 *the Royal College of General Practitioners* 2006;**56**(530):654-5
- 5 193. Lowery B. Medical Home Concept: Policy Implications for an Integrated Approach in Obesity  
6 *Management. Bariatric Nursing and Surgical Patient Care* 2010;**5**(1):89-91
- 7 194. van Avendonk MJ, Mensink PA, Drenthen AJ, et al. Primary care and public health a natural  
8 alliance? The introduction of the guidelines for obesity and undernutrition of the Dutch  
9 College of General Practitioners. *Fam Pract* 2012;**29** **Suppl 1**:i31-35 doi:  
10 10.1093/fampra/cmr095[published Online First: Epub Date]].
- 11 195. Al-Quaiz AJ. Current Concepts in the Management of Obesity. An Evidence Based Review. *Saudi*  
12 *Med J* 2001;**22**(3):205-10
- 13 196. Carvajal R, Wadden TA, Tsai AG, et al. Managing obesity in primary care practice: a narrative  
14 review. *Annals of the New York Academy of Sciences* 2013;**1281**:191-206 doi:  
15 10.1111/nyas.12004[published Online First: Epub Date]].
- 16 197. Kushner RF, Ryan DH. Assessment and lifestyle management of patients with obesity: clinical  
17 recommendations from systematic reviews. *Jama* 2014;**312**(9):943-52 doi:  
18 10.1001/jama.2014.10432[published Online First: Epub Date]].
- 19 198. Australia O. The mission of Obesity Australia is to drive change in the public perceptions of  
20 obesity, its prevalence and its treatment. *Action Agenda. Australia*, 2013.
- 21 199. Bourn J. Tackling Obesity in England. In: General CaA, ed. London: National Audit Office, 2001.
- 22 200. Alexander SC, Cox ME, Boling Turer CL, et al. Do the five A's work when physicians counsel  
23 about weight loss? *Family medicine* 2011;**43**(3):179-84
- 24 201. Alexander SC, Cox ME, Yancy WS, et al. Weight-loss talks: what works (and what doesn't). *The*  
25 *Journal of family practice* 2011;**60**(4):213-9
- 26 202. Klumbiene J, Petkeviciene J, Vaisvalavicius V, et al. Advising overweight persons about diet and  
27 physical activity in primary health care: Lithuanian health behaviour monitoring study. *BMC*  
28 *public health* 2006;**6**:30 doi: 10.1186/1471-2458-6-30[published Online First: Epub Date]].
- 29 203. Linne Y, Rooth P, Rossner S. Success rate of Orlistat in primary-care practice is limited by failure  
30 to follow prescribing recommendations: The referral letter content vs clinical reality.  
31 *International Journal of Obesity* 2003;**27**(11):1434-35
- 32 204. Patterson L, Patterson C, Kee F, et al. Prescribing for weight loss in primary care: Evidence from  
33 a population based study. *Journal of Epidemiology and Community Health* 2013;**67**(5):530-  
34 32 doi: 10.1136/jech-2012-201995[published Online First: Epub Date]].
- 35 205. Hoyt A. Person, place, and prevention in primary care: A multilevel analysis of variation in the  
36 delivery of mental health, substance-use disorder, and obesity services. Dissertation  
37 Abstracts International Section A: Humanities and Social Sciences 2013;**73**(9-A(E)):No  
38 Pagination Specified
- 39 206. Fransen GA, Hiddink GJ, Koelen MA, et al. The development of a minimal intervention strategy  
40 to address overweight and obesity in adult primary care patients in The Netherlands. *Fam*  
41 *Pract* 2008;**25** **Suppl 1**:i112-5 doi: 10.1093/fampra/cmn083[published Online First: Epub  
42 Date]].
- 43 207. Cohen R, Pinheiro JS, Correa JL, et al. Laparoscopic Roux-en-Y gastric bypass for BMI < 35  
44 kg/m(2): a tailored approach. *Surgery for obesity and related diseases : official journal of the*  
45 *American Society for Bariatric Surgery* 2006;**2**(3):401-4, discussion 04 doi:  
46 10.1016/j.soard.2006.02.011[published Online First: Epub Date]].
- 47 208. Fobi M, Lee H, Igwe D, et al. Gastric bypass in patients with BMI < 40 but > 32 without life-  
48 threatening co-morbidities: preliminary report. *Obesity surgery* 2002;**12**(1):52-6 doi:  
49 10.1381/096089202321144586[published Online First: Epub Date]].
- 50 209. Kloek CJ, Tol J, Veenhof C, et al. Dutch General Practitioners' weight management policy for  
51 overweight and obese patients. *BMC obesity* 2014;**1**(2)
- 52  
53  
54  
55  
56  
57  
58  
59  
60



- 1  
2  
3 210. Antognoli EL, Smith KJ, Mason MJ, et al. Direct observation of weight counselling in primary  
4 care: alignment with clinical guidelines. *clinical obesity* 2014;**4**:69-76 doi:  
5 10.1111/cob.12050[published Online First: Epub Date]].
- 6 211. GPs failing to offer weight-loss advice to people who need it. *Nursing Standard* 2015;**29**(23):16  
7 doi: <http://dx.doi.org.virtual.anu.edu.au/10.7748/ns.29.23.16.s20>[published  
8 Online First:  
9 Epub Date]].
- 10 212. Binnie GA. Ten-year follow-up of obesity. *The Journal of the Royal College of General*  
11 *Practitioners* 1977;**27**(181):492-5
- 12 213. Bramlage P, Wittchen HU, Pittrow D, et al. Recognition and management of overweight and  
13 obesity in primary care in Germany. *International journal of obesity and related metabolic*  
14 *disorders : journal of the International Association for the Study of Obesity*  
15 2004;**28**(10):1299-308 doi: 10.1038/sj.ijo.0802752[published Online First: Epub Date]].
- 16 214. Kraschnewski JL, Sciamanna CN, Stuckey HL, et al. A Silent Response to the Obesity Epidemic:  
17 Decline in US Physician Weight Counseling. *Med Care* 2013;**51**:186-92
- 18 215. Morris SE, Lean ME, Hankey CR, et al. Who gets what treatment for obesity? A survey of GPs in  
19 Scotland. *Eur J Clin Nutr* 1999;**53 Suppl 2**:S44-8
- 20 216. Sammut D, Sammut D, Bonnici J. Audit of the diagnosis and management of adult obesity in a  
21 Maltese general practice. *Malta Medical Journal* 2012;**24**(1):16-20
- 22 217. Smith AW, Borowski LA, Liu B, et al. U.S. primary care physicians' diet-, physical activity-, and  
23 weight-related care of adult patients. *American journal of preventive medicine*  
24 2011;**41**(1):33-42 doi: 10.1016/j.amepre.2011.03.017[published Online First: Epub Date]].
- 25 218. Sonntag U, Henkel J, Renneberg B, et al. Counseling overweight patients: analysis of preventive  
26 encounters in primary care. *International Journal for Quality in Health Care* 2010;**22**(6):486-  
27 92
- 28 219. Timmerman GM, Reifsnider E, Allan JD. Weight management practices among primary care  
29 providers. *Journal of the American Academy of Nurse Practitioners* 2000;**12**(4):113-6
- 30 220. Gaglioti A, Petterson SM, Bazemore AW, et al. Primary Care's Ecologic Impact on Obesity. *Am*  
31 *Fam Physician* 2009;**79**(6):446
- 32 221. Morris S, Gravelle H. GP supply and obesity. *Journal of Health Economics* 2008;**27**(5):1357-67
- 33 222. Huber CA, Mohler-Kuo M, Zellweger U, et al. Obesity management and continuing medical  
34 education in primary care: results of a Swiss survey. *BMC Fam Pract* 2011;**12**:140 doi:  
35 10.1186/1471-2296-12-140[published Online First: Epub Date]].
- 36 223. Asselin J, Osunlana AM, Ogunleye AA, et al. Missing an opportunity: the embedded nature of  
37 weight management in primary care. *Clin Obes* 2015;**5**(6):325-32 doi:  
38 10.1111/cob.12115[published Online First: Epub Date]].
- 39 224. Smoking, nutrition, alcohol, physical activity (SNAP): A population health guide to behavioural  
40 risk factors in general practice. Second edition ed. Melbourne: Royal Australian College of  
41 General Practitioners, 2015.
- 42 225. Managing adults who are overweight or obese. NICE guidelines. United Kingdom: National  
43 Institute for Health and Care Excellence, 2015.
- 44 226. Brauer P, Connor Gorber S, Shaw E, et al. Recommendations for prevention of weight gain and  
45 use of behavioural and pharmacologic interventions to manage overweight and obesity in  
46 adults in primary care. *CMAJ : Canadian Medical Association journal = journal de*  
47 *l'Association medicale canadienne* 2015;**187**(3):184-95 doi: 10.1503/cmaj.140887[published  
48 Online First: Epub Date]].
- 49 227. Prevention and Management of Obesity for Adults. In: Care IfCSIH, ed. Sixth edition ed.  
50 [https://www.icsi.org/guidelines\\_more/catalog\\_guidelines\\_and\\_more/catalog\\_guidelines/c](https://www.icsi.org/guidelines_more/catalog_guidelines_and_more/catalog_guidelines/c)  
51 [atalog\\_endocrine\\_guidelines/obesity\\_adults/](https://www.icsi.org/guidelines_more/catalog_guidelines_and_more/catalog_guidelines/c), 2013.
- 52 228. Jensen MD, Ryan DH, Apovian CM, et al. 2013 AHA/ACC/TOS guideline for the management of  
53 overweight and obesity in adults: a report of the American College of Cardiology/American  
54 Heart Association Task Force on Practice Guidelines and The Obesity Society. *Circulation*  
55  
56  
57  
58  
59  
60

- 2014;**129**(25 Suppl 2):S102-38 doi: 10.1161/01.cir.0000437739.71477.ee[published Online First: Epub Date]].
229. Group. NZG. New Zealand Primary Care Handbook 2012. Third edition ed. Wellington, New Zealand: New Zealand Guidelines Group, 2012.
230. U.S. Preventive Services Task Force: Screening for and Management of Obesity in Adults: Recommendation Statement. *Am Fam Physician* 2012;**86**(10):online
231. Moyer VA. Screening for and management of obesity in adults: U.S. Preventive Services Task Force recommendation statement. *Annals of internal medicine* 2012;**157**(5):373-8 doi: 10.7326/0003-4819-157-5-201209040-00475[published Online First: Epub Date]].
232. Overweight. Guidelines for preventive activities in general practice. 8th edition ed. Melbourne: Royal Australian College of General Practitioners, 2012.
233. (RACGP). NACCHONaTRACoGP. Overweight/Obesity. National guide to a preventive health assessment for Aboriginal and Torres Strait Islander people. Second edition ed. Melbourne: Royal Australian College of General Practitioners, 2012.
234. Committee. GaPA. Overweight and Obese Adults: Diagnosis and Management. In: Association BCM, ed. British Columbia: British Columbia Medical Association, 2011.
235. Mathus-Vliegen L, Toouli J, Fried M, et al. Obesity. In: Organisation WG, ed. <http://www.worldgastroenterology.org/guidelines/global-guidelines/obesity/obesity-english>, 2011.
236. Management of Obesity: A national clinical guideline. In: Network SIG, ed. Edinburgh: Scottish Intercollegiate Guidelines Network, 2010.
237. Binsbergen JV, Langens F, Dapper A, et al. Obesity. In: Dutch College of General Practitioners, ed. <https://guidelines.nhg.org/product/obesity>, 2010.
238. Interventions on Diet and Physical Activity: What works. <http://www.who.int/dietphysicalactivity/summary-report-09.pdf?ua=1>: World Health Organisation, 2009.

**Table 1 – Number of different interventions identified in scoping review that describe a role for the family doctor in primary care obesity management - by country where the intervention was undertaken, and study design**

| <b>Country of Intervention</b> |           | <b>Study Design</b>          |           |
|--------------------------------|-----------|------------------------------|-----------|
| Australia                      | 2         | RCT                          | 40        |
| Canada                         | 5         | Single arm trial             | 21        |
| Denmark                        | 1         | Cohort                       | 7         |
| Germany                        | 3         | Non-randomised two arm trial | 2         |
| Israel                         | 2         | Cost effectiveness           | 2         |
| Italy                          | 1         | Action research (protocol)   | 1         |
| Japan                          | 1         | Case control                 | 1         |
| Netherlands                    | 3         | Clinical audit               | 1         |
| New Zealand                    | 2         | Cross sectional              | 1         |
| Scotland                       | 1         | Educational intervention     | 1         |
| Spain                          | 1         |                              |           |
| Switzerland                    | 4         |                              |           |
| United Kingdom                 | 5         |                              |           |
| UK/Australia/Germany           | 1         |                              |           |
| UK/Scotland                    | 1         |                              |           |
| United States of America       | 44        |                              |           |
| <b>Total</b>                   | <b>77</b> | <b>Total</b>                 | <b>77</b> |

**TABLE 2: Interventions in primary care in the management of adult obesity involving the general practitioner (over 7 pages)**

| Author                                   | Multiple <sup>16-17</sup>   | Multiple <sup>18-24</sup> | Bolognesi <sup>25</sup> | Bodenlos <sup>26</sup> | Kerr et al <sup>27</sup> | Multiple <sup>28-30</sup> | Multiple <sup>31-34</sup> | Multiple <sup>14<br/>35-41</sup> | Tsai et al <sup>42</sup> | Banerjee et al <sup>43</sup> | Blonstein et al <sup>44</sup> | Barnes et al <sup>45</sup> |
|------------------------------------------|-----------------------------|---------------------------|-------------------------|------------------------|--------------------------|---------------------------|---------------------------|----------------------------------|--------------------------|------------------------------|-------------------------------|----------------------------|
| Name of intervention                     | Meal replacements in weight | Counterweight             | PACE                    | NA                     | NA                       | Be Fit Be Well            | POWER                     | POWER-UP                         | NA                       | NA                           | NA                            | NA                         |
| Number of papers                         | 2                           | 7                         | 1                       | 1                      | 1                        | 3                         | 4                         | 8                                | 1                        | 1                            | 1                             | 1                          |
| Country                                  | USA                         | UK/Scotland               | Italy                   | USA                    | USA                      | USA                       | USA                       | USA                              | USA                      | USA                          | USA                           | USA                        |
| Year                                     | 2001                        | 2004-12                   | 2006                    | 2007                   | 2008                     | 2009-13                   | 2009-15                   | 2009-15                          | 2010                     | 2013                         | 2013                          | 2015                       |
| Design                                   | RCT                         | Cohort/single arm         | RCT                     | RCT                    | RCT                      | RCT                       | RCT/Cohort                | RCT                              | RCT                      | RCT                          | Single arm trial              | Single arm trial           |
| Diagnosis                                |                             | X                         | X                       |                        |                          |                           | X                         | X                                | X                        |                              | X                             | X                          |
| Recruitment into the trial               | X                           | X                         |                         |                        |                          |                           | X                         | X                                | X                        |                              | X                             |                            |
| Co-ordination                            |                             |                           |                         |                        |                          | X                         | X                         | X                                |                          |                              | X                             |                            |
| Weight and height                        |                             | X                         | X                       |                        |                          |                           |                           |                                  | X                        |                              |                               |                            |
| Waist circumference                      |                             |                           | X                       |                        |                          |                           |                           |                                  |                          |                              |                               |                            |
| System level/implementation              |                             |                           |                         |                        |                          |                           |                           |                                  |                          |                              |                               |                            |
| Doctor-patient relationship              |                             |                           | X                       | X                      |                          |                           | X                         |                                  |                          |                              |                               |                            |
| Public health role                       |                             |                           |                         |                        |                          |                           |                           |                                  |                          |                              |                               |                            |
| Prevention                               |                             |                           |                         |                        |                          |                           |                           |                                  |                          |                              |                               |                            |
| Nutrition education                      | X                           |                           |                         | X                      |                          |                           |                           | X                                | X                        |                              |                               |                            |
| Physical activity education              | X                           |                           | X                       | X                      |                          |                           |                           | X                                | X                        |                              |                               |                            |
| Behaviour modification                   | X                           |                           | X                       | X                      |                          |                           |                           |                                  |                          |                              |                               |                            |
| Counselling/psychology                   |                             |                           | X                       |                        |                          |                           |                           |                                  |                          |                              |                               |                            |
| Role modelling                           |                             |                           |                         |                        |                          |                           |                           |                                  |                          |                              |                               |                            |
| Group based interventions                |                             |                           |                         |                        |                          |                           |                           |                                  |                          |                              |                               |                            |
| Medications                              |                             |                           |                         |                        |                          |                           |                           | X                                |                          |                              |                               |                            |
| Bariatric surgery referral               |                             |                           |                         |                        |                          |                           |                           |                                  |                          |                              |                               |                            |
| Bariatric surgery work-up                |                             |                           |                         |                        |                          |                           |                           |                                  |                          |                              |                               |                            |
| Bariatric surgery after care             |                             |                           |                         |                        |                          |                           |                           |                                  |                          |                              |                               |                            |
| Commercial weight loss program referral  |                             |                           |                         |                        |                          |                           |                           |                                  |                          |                              |                               |                            |
| Bariatric equipment in consultation room |                             |                           |                         |                        |                          |                           |                           |                                  |                          |                              |                               |                            |
| Standard care undefined                  |                             |                           |                         |                        |                          |                           |                           |                                  |                          |                              |                               |                            |
| Standard care was used                   |                             |                           | X                       |                        | X                        | X                         | X                         | X                                |                          | X                            |                               |                            |
| Exact role uncertain                     |                             |                           |                         |                        |                          |                           |                           |                                  |                          | X                            |                               |                            |
| Person centredness                       |                             |                           | X                       | X                      |                          |                           |                           |                                  |                          |                              |                               |                            |
| Whole person care                        |                             |                           | X                       | X                      |                          |                           | X                         | X                                |                          |                              |                               |                            |

|        |                           |                               |                              |                              |                            |                            |                             |                            |                             |
|--------|---------------------------|-------------------------------|------------------------------|------------------------------|----------------------------|----------------------------|-----------------------------|----------------------------|-----------------------------|
| Author | Booth et al <sup>46</sup> | Bordowitz et al <sup>47</sup> | Bowerman et al <sup>48</sup> | Clark et al <sup>49-50</sup> | Coupar et al <sup>51</sup> | Cutler et al <sup>52</sup> | Doering et al <sup>53</sup> | Dutton et al <sup>54</sup> | Eichler et al <sup>55</sup> |
|--------|---------------------------|-------------------------------|------------------------------|------------------------------|----------------------------|----------------------------|-----------------------------|----------------------------|-----------------------------|

1  
2  
3  
4  
5  
6  
7  
8  
9  
10  
11  
12  
13  
14  
15  
16  
17  
18  
19  
20  
21  
22  
23  
24  
25  
26  
27  
28  
29  
30  
31  
32  
33  
34  
35  
36  
37  
38  
39  
40  
41  
42  
43  
44  
45  
46  
47

| Name of intervention                     | NA               | NA              | NA               | Primary care weight management program | NA               | NA               | NA               | NA               | NA               |
|------------------------------------------|------------------|-----------------|------------------|----------------------------------------|------------------|------------------|------------------|------------------|------------------|
| Number of papers                         | 1                | 1               | 1                | 2                                      | 1                | 1                | 1                | 1                | 1                |
| Country                                  | Australia        | USA             | USA              | USA                                    | Scotland         | New Zealand      | USA              | USA              | Switzerland      |
| Year                                     | 2006             | 2007            | 2001             | 2008-10                                | 1980             | 2010             | 2013             | 2015             | 2007             |
| Design                                   | Single arm trial | Cross sectional | Single arm trial | Single arm trial                       | Single arm trial | Single arm trial | Single arm trial | Single arm trial | Single arm trial |
| Diagnosis                                | X                | X               | X                | X                                      | X                |                  |                  | X                | X                |
| Recruitment into the trial               |                  | X               | X                | X                                      | X                | X                |                  | X                | X                |
| Co-ordination                            |                  | X               | X                |                                        | X                |                  |                  |                  |                  |
| Weight and height                        | X                |                 | X                |                                        | X                |                  |                  |                  | X                |
| Waist circumference                      | X                |                 |                  |                                        |                  |                  |                  |                  |                  |
| System level/implementation              |                  |                 |                  |                                        |                  |                  |                  |                  |                  |
| Doctor-patient relationship              |                  |                 |                  |                                        |                  |                  |                  |                  | X                |
| Public health role                       |                  |                 |                  |                                        |                  |                  |                  |                  |                  |
| Prevention                               | X                |                 |                  |                                        |                  |                  |                  |                  |                  |
| Nutrition education                      | X                | X               |                  |                                        | X                |                  |                  |                  | X                |
| Physical activity education              | X                | X               |                  |                                        |                  |                  |                  |                  |                  |
| Behaviour modification                   | X                | X               |                  |                                        |                  |                  |                  |                  | X                |
| Counselling/psychology                   |                  | X               |                  |                                        |                  |                  |                  |                  | X                |
| Role modelling                           |                  |                 |                  |                                        | X                |                  |                  |                  |                  |
| Group based interventions                |                  |                 |                  |                                        | X                |                  |                  |                  | X                |
| Medications                              |                  |                 | X                |                                        |                  |                  |                  |                  |                  |
| Bariatric surgery referral               |                  |                 |                  |                                        |                  |                  |                  |                  |                  |
| Bariatric surgery work-up                |                  |                 |                  |                                        |                  |                  |                  |                  |                  |
| Bariatric surgery after care             |                  |                 |                  |                                        |                  |                  |                  |                  |                  |
| Commercial weight loss program referral  |                  |                 |                  |                                        |                  |                  |                  |                  |                  |
| Bariatric equipment in consultation room |                  |                 |                  |                                        |                  |                  |                  |                  |                  |
| Standard care undefined                  |                  |                 |                  |                                        |                  |                  |                  |                  |                  |
| Standard care was used                   |                  |                 |                  |                                        |                  |                  |                  |                  |                  |
| Exact role uncertain                     |                  |                 |                  |                                        |                  |                  |                  |                  |                  |
| Person centredness                       | X                |                 |                  |                                        |                  |                  |                  |                  |                  |
| Whole person care                        | X                | X               |                  |                                        |                  |                  |                  |                  |                  |

| Author                                   | Ely et al <sup>56</sup> | Feigenbaum et al <sup>57</sup> | Kanke et al <sup>58</sup> | Multiple <sup>59-61</sup>       | Huerta et al <sup>62</sup> | Garies et al <sup>63</sup> | Gusi et al <sup>64</sup> | Haas et al <sup>65</sup> | Multiple <sup>66-68</sup> | Hauner et al <sup>69</sup> | Hoke et al <sup>70</sup> |
|------------------------------------------|-------------------------|--------------------------------|---------------------------|---------------------------------|----------------------------|----------------------------|--------------------------|--------------------------|---------------------------|----------------------------|--------------------------|
| Name of intervention                     | NA                      | NA                             | NA                        | Commercial weight loss referral | NA                         | NA                         | NA                       | NA                       | Lighten-Up                | NA                         | NA                       |
| Number of papers                         | 1                       | 1                              | 1                         | 3                               | 1                          | 1                          | 1                        | 1                        | 3                         | 1                          | 1                        |
| Country                                  | USA                     | Israel                         | Japan                     | UK/Australia/Germany            | USA                        | Canada                     | Spain                    | USA                      | UK                        | Germany                    | USA                      |
| Year                                     | 2008                    | 2005                           | 2015                      | 2011-14                         | 2004                       | 2015                       | 2008                     | 2012                     | 2010-12                   | 2004                       | 2002                     |
| Design                                   | RCT                     | Two arm, non randomised        | RCT                       | RCT                             | Cohort                     | Cohort                     | RCT                      | Cohort                   | RCT                       | RCT                        | Single arm trial         |
| Diagnosis                                | X                       |                                |                           | X                               | X                          | X                          | X                        | X                        | X                         | X                          | X                        |
| Recruitment into the trial               | X                       | X                              |                           | X                               | X                          | X                          | X                        | X                        | X                         | X                          | X                        |
| Co-ordination                            | X                       | X                              |                           |                                 | X                          |                            |                          |                          |                           |                            |                          |
| Weight and height                        | X                       | X                              |                           | X                               | X                          | X                          | X                        | X                        |                           | X                          |                          |
| Waist circumference                      |                         |                                |                           | X                               |                            |                            |                          |                          |                           | X                          |                          |
| System level/implementation              |                         |                                |                           |                                 |                            |                            |                          |                          |                           |                            |                          |
| Doctor-patient relationship              | X                       |                                | X                         |                                 |                            | X                          |                          |                          |                           |                            |                          |
| Public health role                       |                         |                                |                           |                                 |                            |                            |                          |                          |                           |                            |                          |
| Prevention                               |                         |                                |                           |                                 |                            |                            |                          |                          |                           |                            |                          |
| Nutrition education                      |                         | X                              | X                         | X                               |                            | X                          |                          | X                        |                           |                            |                          |
| Physical activity education              |                         |                                | X                         | X                               |                            | X                          |                          | X                        |                           |                            |                          |
| Behaviour modification                   |                         | X                              |                           |                                 |                            |                            |                          | X                        |                           |                            |                          |
| Counselling/psychology                   |                         |                                |                           |                                 |                            |                            |                          | X                        |                           |                            |                          |
| Role modelling                           |                         |                                |                           |                                 |                            |                            |                          |                          |                           |                            |                          |
| Group based interventions                |                         |                                |                           |                                 |                            |                            |                          |                          |                           |                            |                          |
| Medications                              |                         | X                              |                           |                                 |                            |                            |                          |                          |                           | X                          |                          |
| Bariatric surgery referral               |                         |                                |                           |                                 |                            |                            |                          |                          |                           |                            |                          |
| Bariatric surgery work-up                |                         |                                |                           |                                 |                            |                            |                          |                          |                           |                            |                          |
| Bariatric surgery after care             |                         |                                |                           |                                 |                            |                            |                          |                          |                           |                            |                          |
| Commercial weight loss program referral  |                         |                                |                           | X                               |                            |                            |                          |                          |                           |                            |                          |
| Bariatric equipment in consultation room |                         |                                |                           |                                 |                            |                            |                          |                          |                           |                            |                          |
| Standard care undefined                  |                         |                                |                           |                                 |                            |                            |                          |                          |                           |                            |                          |
| Standard care was used                   | X                       |                                | X                         | X                               |                            |                            | X                        |                          |                           |                            |                          |
| Exact role uncertain                     |                         |                                |                           |                                 |                            |                            |                          |                          |                           |                            |                          |
| Person centredness                       |                         |                                |                           |                                 |                            |                            |                          |                          |                           |                            |                          |
| Whole person care                        |                         |                                | X                         |                                 |                            |                            |                          |                          |                           |                            |                          |

| Author                                   | Kumanyika et al <sup>71</sup><br>72 | Kuppersmith et al <sup>73</sup> | Laing et al <sup>74</sup> | Lewis et al <sup>75</sup> | Logue et al <sup>76</sup><br>77                           | Logue et al <sup>78</sup> | Lowe et al <sup>79</sup> | Madigan et al <sup>80</sup> | Martin et al <sup>81</sup><br>82              | McDoniel et al <sup>83</sup><br>84 | Mehring et al <sup>85</sup> |
|------------------------------------------|-------------------------------------|---------------------------------|---------------------------|---------------------------|-----------------------------------------------------------|---------------------------|--------------------------|-----------------------------|-----------------------------------------------|------------------------------------|-----------------------------|
| Name of intervention                     | Think Health                        | NA                              | NA                        | NA                        | Theoretical Model-<br>Chronic Disease Care<br>for Obesity | NA                        | NA                       | NA                          | A Primary Care Weight Management Intervention | The SMART motivational trial       | NA                          |
| Number of papers                         | 2                                   | 1                               | 1                         | 1                         | 2                                                         | 1                         | 1                        | 1                           | 2                                             | 2                                  | 1                           |
| Country                                  | USA                                 | USA                             | USA                       | UK                        | USA                                                       | USA                       | USA                      | UK                          | USA                                           | USA                                | Germany                     |
| Year                                     | 2011-12                             | 2006                            | 2014                      | 2013                      | 2000-2005                                                 | 2012                      | 2014                     | 2014                        | 2006-08                                       | 2009-10                            | 2013                        |
| Design                                   | RCT                                 | Single arm trial                | RCT                       | RCT                       | RCT                                                       | RCT                       | RCT                      | RCT                         | RCT                                           | Single arm trial                   | RCT                         |
| Diagnosis                                | X                                   |                                 |                           |                           | X                                                         |                           | X                        | X                           |                                               | X                                  | X                           |
| Recruitment into the trial               | X                                   |                                 |                           |                           | X                                                         | X                         | X                        | X                           | X                                             | X                                  | X                           |
| Co-ordination                            |                                     | X                               |                           |                           | X                                                         |                           |                          |                             |                                               | X                                  | X                           |
| Weight and height                        |                                     |                                 |                           |                           |                                                           |                           |                          |                             | X                                             | X                                  | X                           |
| Waist circumference                      |                                     |                                 |                           |                           |                                                           |                           |                          |                             |                                               |                                    | X                           |
| System level/implementation              |                                     |                                 |                           |                           |                                                           |                           |                          |                             |                                               |                                    |                             |
| Doctor-patient relationship              |                                     |                                 |                           |                           |                                                           |                           |                          |                             | X                                             | X                                  | X                           |
| Public health role                       |                                     |                                 |                           |                           |                                                           |                           |                          |                             |                                               |                                    |                             |
| Prevention                               |                                     |                                 |                           |                           |                                                           |                           |                          |                             |                                               |                                    |                             |
| Nutrition education                      | X                                   | X                               |                           |                           |                                                           |                           |                          |                             | X                                             |                                    |                             |
| Physical activity education              | X                                   |                                 |                           |                           |                                                           |                           |                          |                             | X                                             |                                    |                             |
| Behaviour modification                   | X                                   |                                 |                           |                           |                                                           |                           |                          |                             | X                                             |                                    | X                           |
| Counselling/psychology                   | X                                   |                                 |                           |                           |                                                           |                           |                          |                             | X                                             |                                    | X                           |
| Role modelling                           |                                     |                                 |                           |                           |                                                           |                           |                          |                             |                                               |                                    |                             |
| Group based interventions                |                                     |                                 |                           |                           |                                                           |                           |                          |                             |                                               |                                    |                             |
| Medications                              |                                     | X                               |                           |                           |                                                           |                           |                          |                             |                                               |                                    |                             |
| Bariatric surgery referral               |                                     | X                               |                           |                           |                                                           |                           |                          |                             |                                               |                                    |                             |
| Bariatric surgery work-up                |                                     |                                 |                           |                           |                                                           |                           |                          |                             |                                               |                                    |                             |
| Bariatric surgery after care             |                                     |                                 |                           |                           |                                                           |                           |                          |                             |                                               |                                    |                             |
| Commercial weight loss program referral  |                                     |                                 |                           | X                         |                                                           |                           |                          |                             |                                               |                                    |                             |
| Bariatric equipment in consultation room |                                     |                                 |                           |                           |                                                           |                           |                          |                             |                                               |                                    |                             |
| Standard care undefined                  |                                     | X                               | X                         |                           |                                                           |                           |                          |                             | X                                             |                                    | X                           |
| Standard care was used                   |                                     | X                               | X                         |                           |                                                           |                           |                          | X                           | X                                             |                                    | X                           |
| Exact role uncertain                     |                                     |                                 |                           |                           |                                                           |                           |                          |                             |                                               |                                    |                             |
| Person centredness                       |                                     |                                 |                           |                           | X                                                         |                           |                          |                             | X                                             |                                    | X                           |
| Whole person care                        |                                     | X                               |                           |                           | X                                                         |                           |                          |                             | X                                             |                                    | X                           |

| Author                                   | Munsch et al <sup>86</sup> | O'Grady et al <sup>87</sup> | Olsen et al <sup>88</sup> | Pellegrini et al <sup>89</sup> | Richman et al <sup>90</sup> | Ross et al <sup>91,92</sup> | Rutten et al <sup>93</sup> | Saris et al <sup>94</sup> | Stephens et al <sup>95</sup> | Multiple <sup>96-100</sup> | Thomas et al <sup>101</sup> | Toth-Capelli et al <sup>102</sup> |
|------------------------------------------|----------------------------|-----------------------------|---------------------------|--------------------------------|-----------------------------|-----------------------------|----------------------------|---------------------------|------------------------------|----------------------------|-----------------------------|-----------------------------------|
| Name of intervention                     | NA                         | NA                          | NA                        | NA                             | NA                          | PROACTIVE                   | NA                         | NA                        | NA                           | Groningen Overweight       | NA                          | NA                                |
| Number of papers                         | 1                          | 1                           | 1                         | 1                              | 1                           | 2                           | 1                          | 1                         | 1                            | 5                          | 1                           | 1                                 |
| Country                                  | Switzerland                | USA                         | Denmark                   | USA                            | Australia                   | Canada                      | Netherlands                | Netherlands               | USA                          | Netherlands                | USA                         | USA                               |
| Year                                     | 2003                       | 2013                        | 2005                      | 2014                           | 1996                        | 2009-12                     | 2014                       | 1992                      | 2008                         | 2009-12                    | 2015                        | 2013                              |
| Design                                   | RCT                        | Clinical audit              | Cost effectiveness        | RCT                            | Case control                | RCT                         | Cohort                     | Single arm trial          | Cohort                       | Single arm, RCT            | RCT                         | Single arm trial                  |
| Diagnosis                                |                            |                             | X                         |                                | X                           | X                           | X                          | X                         |                              |                            | X                           | X                                 |
| Recruitment into the trial               |                            |                             | X                         |                                | X                           | X                           | X                          | X                         |                              |                            | X                           | X                                 |
| Co-ordination                            | X                          |                             |                           |                                | X                           |                             |                            | X                         |                              |                            | X                           |                                   |
| Weight and height                        | X                          | X                           | X                         |                                | X                           |                             |                            | X                         |                              |                            | X                           |                                   |
| Waist circumference                      |                            |                             | X                         |                                | X                           |                             |                            |                           |                              |                            |                             |                                   |
| System level/implementation              |                            |                             |                           |                                |                             |                             |                            |                           |                              |                            |                             |                                   |
| Doctor-patient relationship              |                            |                             |                           |                                | X                           |                             |                            |                           |                              |                            | X                           |                                   |
| Public health role                       |                            |                             |                           |                                |                             |                             |                            |                           |                              |                            |                             |                                   |
| Prevention                               |                            |                             |                           |                                |                             |                             |                            |                           |                              |                            |                             |                                   |
| Nutrition education                      | X                          |                             | X                         |                                | X                           |                             |                            |                           |                              |                            |                             |                                   |
| Physical activity education              | X                          |                             |                           |                                | X                           |                             |                            |                           |                              |                            |                             |                                   |
| Behaviour modification                   | X                          |                             |                           |                                | X                           |                             |                            |                           |                              |                            |                             |                                   |
| Counselling/psychology                   | X                          |                             |                           |                                |                             |                             |                            |                           |                              |                            |                             |                                   |
| Role modelling                           |                            |                             |                           |                                |                             |                             |                            |                           |                              |                            |                             |                                   |
| Group based interventions                | X                          |                             |                           |                                |                             |                             |                            |                           |                              |                            |                             |                                   |
| Medications                              |                            |                             |                           |                                |                             |                             |                            |                           |                              |                            |                             |                                   |
| Bariatric surgery referral               |                            |                             |                           |                                |                             |                             |                            |                           |                              |                            |                             |                                   |
| Bariatric surgery work-up                |                            |                             |                           |                                |                             |                             |                            |                           |                              |                            |                             |                                   |
| Bariatric surgery after care             |                            |                             |                           |                                |                             |                             |                            |                           |                              |                            |                             |                                   |
| Commercial weight loss program referral  |                            |                             |                           |                                |                             |                             |                            |                           |                              |                            |                             |                                   |
| Bariatric equipment in consultation room |                            |                             |                           |                                |                             |                             |                            |                           |                              |                            |                             |                                   |
| Standard care undefined                  | X                          | X                           |                           |                                |                             | X                           |                            |                           | X                            | X                          |                             |                                   |
| Standard care used                       | X                          | X                           |                           |                                |                             | X                           |                            |                           | X                            | X                          |                             |                                   |
| Exact role uncertain                     |                            |                             |                           | X                              |                             |                             |                            |                           |                              |                            |                             |                                   |
| Person centredness                       |                            |                             |                           |                                | X                           |                             |                            |                           |                              |                            |                             |                                   |
| Whole person care                        |                            | X                           |                           |                                | X                           |                             |                            |                           |                              |                            | X                           |                                   |



| Author                                   | Tsai et al <sup>103</sup> | Wadden et al <sup>104</sup> | Wilson et al <sup>105</sup>  | Wirth et al <sup>106</sup> | Yardley et al <sup>107</sup> | Tsai et al <sup>108</sup> | Ryan et al <sup>109</sup> | Baillargeon et al <sup>110</sup> | Baillargeon et al <sup>111</sup> | Katz et al <sup>112</sup> | Buclin-Thiebaud et al <sup>113</sup> | Feuerstein et al <sup>114</sup> |
|------------------------------------------|---------------------------|-----------------------------|------------------------------|----------------------------|------------------------------|---------------------------|---------------------------|----------------------------------|----------------------------------|---------------------------|--------------------------------------|---------------------------------|
| Name of intervention                     | NA                        | NA                          | NA                           | NA                         | NA                           | NA                        | NA                        | NA                               | NA                               | NA                        | NA                                   | NA                              |
| Number of papers                         | 1                         | 1                           | 1                            | 1                          | 1                            | 1                         | 1                         | 1                                | 1                                | 1                         | 1                                    | 1                               |
| Country                                  | USA                       | USA                         | USA                          | Germany                    | UK                           | USA                       | USA                       | Canada                           | Canada                           | Israel                    | Switzerland                          | USA                             |
| Year                                     | 2012                      | 2005                        | 2010                         | 2005                       | 2014                         | 2015                      | 2010                      | 2007                             | 2014                             | 2005                      | 2010                                 | 2015                            |
| Design                                   | Cost effectiveness        | RCT                         | Non-randomised two arm trial | Single arm trial           | RCT                          | RCT                       | RCT                       | Action research (protocol)       | RCT (protocol)                   | Educational intervention  | Single arm trial                     | Single arm trial                |
| Diagnosis                                |                           |                             | X                            | X                          |                              |                           | X                         |                                  |                                  | X                         |                                      | X                               |
| Recruitment into the trial               |                           | X                           | X                            | X                          |                              |                           | X                         |                                  |                                  |                           |                                      |                                 |
| Co-ordination                            |                           |                             | X                            | X                          |                              |                           | X                         |                                  | X                                | X                         |                                      |                                 |
| Weight and height                        |                           |                             | X                            | X                          |                              |                           | X                         |                                  | X                                |                           |                                      | X                               |
| Waist circumference                      |                           |                             |                              |                            |                              |                           | X                         |                                  | X                                |                           |                                      |                                 |
| System level/implementation              |                           |                             |                              |                            |                              |                           |                           |                                  |                                  |                           |                                      |                                 |
| Doctor-patient relationship              |                           |                             |                              |                            |                              |                           |                           |                                  |                                  |                           |                                      |                                 |
| Public health role                       |                           |                             |                              |                            |                              |                           |                           |                                  |                                  |                           |                                      |                                 |
| Prevention                               |                           |                             |                              |                            |                              |                           |                           |                                  |                                  |                           |                                      |                                 |
| Nutrition education                      |                           |                             |                              | X                          |                              |                           | X                         |                                  | X                                | X                         |                                      | X                               |
| Physical activity education              |                           |                             |                              | X                          |                              |                           |                           |                                  | X                                | X                         |                                      |                                 |
| Behaviour modification                   |                           |                             |                              | X                          |                              |                           |                           |                                  | X                                | X                         |                                      |                                 |
| Counselling/psychology                   |                           |                             |                              |                            |                              |                           |                           |                                  |                                  |                           |                                      |                                 |
| Role modelling                           |                           |                             |                              |                            |                              |                           |                           |                                  |                                  |                           |                                      |                                 |
| Group based interventions                |                           |                             |                              | X                          |                              |                           |                           |                                  |                                  |                           |                                      |                                 |
| Medications                              |                           |                             |                              | X                          |                              |                           | X                         |                                  |                                  | X                         |                                      |                                 |
| Bariatric surgery referral               |                           |                             |                              |                            |                              |                           |                           |                                  |                                  | X                         |                                      |                                 |
| Bariatric surgery work-up                |                           |                             |                              |                            |                              |                           |                           |                                  |                                  |                           |                                      |                                 |
| Bariatric surgery after care             |                           |                             |                              |                            |                              |                           |                           |                                  |                                  |                           |                                      |                                 |
| Commercial weight loss program referral  |                           |                             |                              |                            |                              |                           |                           |                                  |                                  |                           |                                      |                                 |
| Bariatric equipment in consultation room |                           |                             |                              |                            |                              |                           |                           |                                  |                                  |                           |                                      |                                 |
| Standard care undefined                  |                           |                             | X                            |                            | X                            |                           |                           |                                  |                                  |                           |                                      |                                 |
| Standard care was used                   |                           |                             | X                            |                            | X                            |                           | X                         |                                  |                                  |                           |                                      |                                 |
| Exact role uncertain                     |                           |                             |                              |                            |                              |                           |                           | X                                |                                  |                           | X                                    |                                 |
| Person centredness                       |                           |                             |                              |                            |                              |                           |                           |                                  |                                  |                           |                                      |                                 |
| Whole person care                        |                           |                             |                              | X                          |                              |                           |                           |                                  | X                                |                           |                                      | X                               |

| Author                                   | Hartman et al <sup>115</sup> | Lin et al <sup>116</sup> | Moore et al <sup>117</sup> | Rodondi et al <sup>118</sup> | Rueda-Clausen et al <sup>119</sup> | Schuster et al <sup>120</sup> | Yank et al <sup>121</sup> | Goodyear-Smith et al <sup>122</sup> | Jay et al <sup>123</sup> | Wadden et al <sup>124</sup> |
|------------------------------------------|------------------------------|--------------------------|----------------------------|------------------------------|------------------------------------|-------------------------------|---------------------------|-------------------------------------|--------------------------|-----------------------------|
| Name of intervention                     | NA                           | NA                       | NA                         | NA                           | NA                                 | NA                            | NA                        | NA                                  | NA                       | NA                          |
| Number of papers                         | 1                            | 1                        | 1                          | 1                            | 1                                  | 1                             | 1                         | 1                                   | 1                        | 1                           |
| Country                                  | USA                          | USA                      | UK                         | Switzerland                  | Canada                             | USA                           | USA                       | New Zealand                         | USA                      | USA                         |
| Year                                     | 2014                         | 2015                     | 2003                       | 2006                         | 2014                               | 2008                          | 2013                      | 2014                                | 2013                     | 1997                        |
| Design                                   | RCT (protocol)               | RCT                      | RCT                        | Cohort study                 | Single arm trial                   | Single arm trial              | RCT                       | RCT                                 | RCT                      | RCT                         |
| Diagnosis                                | X                            |                          | X                          | X                            |                                    | X                             |                           | X                                   | X                        | X                           |
| Recruitment into the trial               | X                            |                          |                            |                              |                                    |                               |                           | X                                   |                          | X                           |
| Co-ordination                            | X                            |                          |                            |                              | X                                  | X                             |                           |                                     | X                        |                             |
| Weight and height                        | X                            |                          |                            | X                            |                                    | X                             |                           | X                                   | X                        |                             |
| Waist circumference                      | X                            |                          |                            |                              |                                    |                               |                           |                                     |                          |                             |
| System level/implementation              |                              |                          |                            |                              |                                    | X                             |                           |                                     |                          |                             |
| Doctor-patient relationship              |                              |                          |                            | X                            | X                                  |                               |                           |                                     |                          |                             |
| Public health role                       |                              |                          |                            |                              |                                    | X                             |                           |                                     |                          |                             |
| Prevention                               |                              |                          |                            |                              |                                    |                               |                           |                                     |                          |                             |
| Nutrition education                      |                              |                          | X                          | X                            |                                    | X                             |                           |                                     | X                        |                             |
| Physical activity education              |                              |                          | X                          | X                            |                                    | X                             |                           |                                     | X                        |                             |
| Behaviour modification                   |                              |                          | X                          | X                            |                                    | X                             |                           |                                     | X                        |                             |
| Counselling/psychology                   |                              |                          |                            |                              |                                    |                               |                           |                                     |                          |                             |
| Role modelling                           |                              |                          |                            |                              |                                    |                               |                           |                                     |                          |                             |
| Group based interventions                |                              |                          |                            |                              |                                    |                               |                           |                                     |                          |                             |
| Medications                              |                              |                          |                            |                              |                                    |                               |                           |                                     |                          |                             |
| Bariatric surgery referral               |                              |                          |                            |                              |                                    |                               |                           |                                     |                          |                             |
| Bariatric surgery work-up                |                              |                          |                            |                              |                                    |                               |                           |                                     |                          |                             |
| Bariatric surgery after care             |                              |                          |                            |                              |                                    |                               |                           |                                     |                          |                             |
| Commercial weight loss program referral  |                              |                          |                            |                              |                                    |                               |                           |                                     |                          |                             |
| Bariatric equipment in consultation room |                              |                          |                            |                              |                                    |                               |                           |                                     |                          |                             |
| Standard care undefined                  |                              |                          | X                          |                              | X                                  |                               | X                         | X                                   |                          |                             |
| Standard care was used                   |                              |                          | X                          |                              | X                                  |                               | X                         | X                                   |                          |                             |
| Exact role uncertain                     |                              |                          | X                          |                              | X                                  |                               |                           |                                     |                          |                             |
| Person centredness                       |                              |                          |                            |                              |                                    |                               |                           |                                     |                          |                             |
| Whole person care                        |                              |                          |                            |                              |                                    |                               |                           |                                     |                          |                             |

**TABLE 3: Clinical overviews and opinion articles on the role of the family doctor in the management of adult obesity in primary care (over 7 pages)**

| Author                                   | Anderson, Wadden <sup>125</sup>                                   | Rao <sup>126</sup>                                    | Simkin-Silverman et al <sup>127</sup>          | Logue, Smucker <sup>128</sup>                               | Lyznicki et al <sup>129</sup>                      | Sherman et al <sup>130</sup>                          | Vallis et al <sup>131</sup>                                   | Benotti <sup>132</sup>                    | Brown et al <sup>133</sup>              | Choban et al <sup>134</sup>           |
|------------------------------------------|-------------------------------------------------------------------|-------------------------------------------------------|------------------------------------------------|-------------------------------------------------------------|----------------------------------------------------|-------------------------------------------------------|---------------------------------------------------------------|-------------------------------------------|-----------------------------------------|---------------------------------------|
| Title                                    | Treating the obese patient: suggestions for primary care practice | Office-based strategies for the management of obesity | Treatment of overweight and obesity in primary | Obesity management in primary care: changing the status quo | Obesity: Assessment and Management in Primary Care | Health coaching integration into primary care for the | Modified 5 As: Minimal intervention for obesity counseling in | Patient preparation for bariatric surgery | Laparoscopic adjustable gastric banding | Bariatric surgery for morbid obesity: |
| Country                                  | USA                                                               | USA                                                   | USA                                            | USA                                                         | USA                                                | USA                                                   | Canada                                                        | USA                                       | Australia                               | USA                                   |
| Year                                     | 1999                                                              | 2010                                                  | 2008                                           | 2001                                                        | 2001                                               | 2013                                                  | 2013                                                          | 2014                                      | 2009                                    | 2002                                  |
| Overview/opinion                         | Overview                                                          | Overview                                              | Overview                                       | Editorial                                                   | Overview                                           | Opinion                                               | Overview                                                      | Overview (bariatric)                      | Overview (bariatric)                    | Overview (bariatric)                  |
| Diagnosis                                | X                                                                 | X                                                     | X                                              | X                                                           | X                                                  | X                                                     | X                                                             | X                                         | X                                       | X                                     |
| Co-ordination                            | X                                                                 | X                                                     | X                                              |                                                             | X                                                  | X                                                     | X                                                             |                                           | X                                       | X                                     |
| Weight and height                        | X                                                                 | X                                                     |                                                | X                                                           | X                                                  |                                                       | X                                                             | X                                         |                                         |                                       |
| Waist circumference                      |                                                                   | X                                                     |                                                |                                                             | X                                                  |                                                       | X                                                             | X                                         |                                         |                                       |
| System level/implementation              |                                                                   |                                                       |                                                |                                                             |                                                    |                                                       |                                                               |                                           |                                         |                                       |
| Doctor-patient relationship              |                                                                   |                                                       |                                                |                                                             |                                                    |                                                       |                                                               |                                           |                                         |                                       |
| Public health role                       |                                                                   |                                                       |                                                |                                                             |                                                    |                                                       |                                                               |                                           |                                         |                                       |
| Prevention                               |                                                                   |                                                       |                                                |                                                             |                                                    |                                                       |                                                               |                                           |                                         |                                       |
| Nutrition education                      | X                                                                 | X                                                     | X                                              | X                                                           |                                                    |                                                       | X                                                             |                                           |                                         | X                                     |
| Physical activity education              | X                                                                 | X                                                     |                                                | X                                                           |                                                    |                                                       | X                                                             |                                           |                                         |                                       |
| Behaviour modification                   | X                                                                 | X                                                     |                                                | X                                                           |                                                    |                                                       | X                                                             |                                           |                                         |                                       |
| Counselling/psychology                   |                                                                   |                                                       |                                                |                                                             |                                                    |                                                       | X                                                             |                                           |                                         |                                       |
| Role modelling                           |                                                                   |                                                       |                                                |                                                             | X                                                  |                                                       |                                                               |                                           |                                         |                                       |
| Group based interventions                |                                                                   |                                                       |                                                |                                                             |                                                    |                                                       |                                                               |                                           |                                         |                                       |
| Medications                              | X                                                                 | X                                                     |                                                | X                                                           | X                                                  |                                                       |                                                               |                                           |                                         |                                       |
| Bariatric surgery referral               | X                                                                 | X                                                     |                                                |                                                             | X                                                  |                                                       |                                                               | X                                         | X                                       | X                                     |
| Bariatric surgery work-up                |                                                                   |                                                       |                                                |                                                             |                                                    |                                                       |                                                               | X                                         |                                         |                                       |
| Bariatric surgery after care             |                                                                   |                                                       |                                                |                                                             |                                                    |                                                       |                                                               |                                           |                                         | X                                     |
| Commercial weight loss program referral  | X                                                                 | X                                                     |                                                |                                                             |                                                    |                                                       |                                                               |                                           |                                         |                                       |
| Bariatric equipment in consultation room |                                                                   |                                                       |                                                |                                                             |                                                    |                                                       |                                                               |                                           |                                         |                                       |
| Standard care undefined                  |                                                                   |                                                       |                                                |                                                             |                                                    |                                                       |                                                               |                                           |                                         |                                       |
| Exact role uncertain                     |                                                                   |                                                       | X                                              |                                                             |                                                    |                                                       |                                                               |                                           | X                                       |                                       |
| Person centredness                       |                                                                   |                                                       |                                                | X                                                           |                                                    |                                                       | X                                                             |                                           |                                         |                                       |
| Whole person care                        |                                                                   |                                                       |                                                | X                                                           | X                                                  |                                                       | X                                                             | X                                         |                                         |                                       |

|                                          |                                      |                                                               |                                                            |                              |                                                  |                                   |                                                              |                                                             |                                                          |                                     |                                              |
|------------------------------------------|--------------------------------------|---------------------------------------------------------------|------------------------------------------------------------|------------------------------|--------------------------------------------------|-----------------------------------|--------------------------------------------------------------|-------------------------------------------------------------|----------------------------------------------------------|-------------------------------------|----------------------------------------------|
| Author                                   | DeMaria <sup>135</sup>               | Dixon <sup>136</sup>                                          | Heber et al <sup>137</sup>                                 | Karmali et al <sup>138</sup> | Pietras et al <sup>139</sup>                     | Richardson <sup>140</sup>         | Shafipour et al <sup>141</sup>                               | Snow et al <sup>142</sup>                                   | Van Sickle <sup>143</sup>                                | Virji et al <sup>144</sup>          | Wilbert et al <sup>145</sup>                 |
| Title                                    | Bariatric surgery for morbid obesity | Referral for a bariatric surgical consultation: it is time to | Endocrine and nutritional management of the post-bariatric | Bariatric surgery: a primer  | Preoperative and postoperative management of the | Bariatric society is here to help | What do I do with my morbidly obese patient? A detailed case | Pharmacologic and surgical management of obesity in primary | Management of the Challenging Bariatric Surgical Patient | Caring for patients after bariatric | Appetite suppressants as adjuncts for weight |
| Country                                  | USA                                  | Australia                                                     | USA                                                        | Canada                       | USA                                              | USA                               | USA                                                          | USA                                                         | USA                                                      | USA                                 | USA                                          |
| Year                                     | 2007                                 | 2009                                                          | 2010                                                       | 2010                         | 2007                                             | 2010                              | 2009                                                         | 2005                                                        | 2007                                                     | 2006                                | 2011                                         |
| Overview/opinion                         | Overview                             | Opinion                                                       | Expert opinion                                             | Overview                     | Overview                                         | Single opinion                    | Overview                                                     | Expert opinion                                              | Overview                                                 | Overview                            | Overview                                     |
| Diagnosis                                | X                                    | X                                                             |                                                            | X                            |                                                  | X                                 | X                                                            | X                                                           | X                                                        |                                     | X                                            |
| Co-ordination                            | X                                    | X                                                             |                                                            | X                            |                                                  | X                                 | X                                                            | X                                                           | X                                                        |                                     |                                              |
| Weight and height                        |                                      |                                                               |                                                            |                              |                                                  | X                                 | X                                                            | X                                                           | X                                                        |                                     | X                                            |
| Waist circumference                      |                                      |                                                               |                                                            |                              |                                                  |                                   |                                                              |                                                             |                                                          |                                     |                                              |
| System level/implementation              |                                      |                                                               |                                                            |                              |                                                  |                                   |                                                              |                                                             |                                                          |                                     |                                              |
| Doctor-patient relationship              |                                      |                                                               |                                                            |                              |                                                  |                                   |                                                              |                                                             |                                                          |                                     |                                              |
| Public health role                       |                                      |                                                               |                                                            |                              |                                                  |                                   |                                                              |                                                             |                                                          |                                     |                                              |
| Prevention                               |                                      |                                                               |                                                            |                              |                                                  |                                   |                                                              |                                                             |                                                          |                                     |                                              |
| Nutrition education                      |                                      |                                                               |                                                            |                              |                                                  |                                   | X                                                            | X                                                           |                                                          |                                     | X                                            |
| Physical activity education              |                                      |                                                               |                                                            |                              |                                                  |                                   |                                                              | X                                                           |                                                          |                                     | X                                            |
| Behaviour modification                   |                                      |                                                               |                                                            |                              |                                                  |                                   |                                                              | X                                                           |                                                          |                                     |                                              |
| Counselling/psychology                   |                                      |                                                               |                                                            |                              |                                                  |                                   | X                                                            |                                                             |                                                          |                                     |                                              |
| Role modelling                           |                                      |                                                               |                                                            |                              |                                                  |                                   |                                                              |                                                             |                                                          |                                     |                                              |
| Group based interventions                |                                      |                                                               |                                                            |                              |                                                  |                                   |                                                              |                                                             |                                                          |                                     |                                              |
| Medications                              |                                      |                                                               |                                                            |                              |                                                  |                                   |                                                              | X                                                           |                                                          |                                     | X                                            |
| Bariatric surgery referral               | X                                    | X                                                             |                                                            | X                            | X                                                | X                                 | X                                                            | X                                                           | X                                                        | X                                   |                                              |
| Bariatric surgery work-up                | X                                    |                                                               |                                                            | X                            |                                                  |                                   |                                                              |                                                             |                                                          |                                     |                                              |
| Bariatric surgery after care             | X                                    |                                                               | X                                                          | X                            | X                                                |                                   | X                                                            |                                                             | X                                                        | X                                   |                                              |
| Commercial weight loss program referral  |                                      |                                                               |                                                            |                              |                                                  |                                   |                                                              |                                                             |                                                          |                                     |                                              |
| Bariatric equipment in consultation room |                                      |                                                               |                                                            |                              |                                                  |                                   |                                                              |                                                             |                                                          |                                     |                                              |
| Standard care undefined                  |                                      |                                                               |                                                            |                              |                                                  |                                   |                                                              |                                                             |                                                          |                                     |                                              |
| Exact role uncertain                     | X                                    |                                                               |                                                            |                              |                                                  |                                   |                                                              |                                                             |                                                          | X                                   |                                              |
| Person centredness                       |                                      |                                                               |                                                            |                              |                                                  |                                   |                                                              |                                                             | X                                                        |                                     |                                              |
| Whole person care                        |                                      |                                                               |                                                            |                              |                                                  |                                   | X                                                            | X                                                           |                                                          |                                     |                                              |

|        |                             |                       |                       |                              |                              |                         |                               |                                 |                          |                        |                                  |
|--------|-----------------------------|-----------------------|-----------------------|------------------------------|------------------------------|-------------------------|-------------------------------|---------------------------------|--------------------------|------------------------|----------------------------------|
| Author | Kolasa et al <sup>146</sup> | Mercer <sup>147</sup> | UK Health Development | Agrawal et al <sup>149</sup> | Brunton et al <sup>150</sup> | Bartlett <sup>151</sup> | Benjamin et al <sup>152</sup> | Birmingham et al <sup>153</sup> | Caulfield <sup>154</sup> | Cervený <sup>155</sup> | Fitzpatrick et al <sup>156</sup> |
|--------|-----------------------------|-----------------------|-----------------------|------------------------------|------------------------------|-------------------------|-------------------------------|---------------------------------|--------------------------|------------------------|----------------------------------|

| Title                                    | Weight loss strategies that really work | How useful are clinical guidelines for the management of obesity | Agency <sup>148</sup><br>Care pathways for the prevention and management | Managing obesity like any other chronic condition. | Management of Obesity in Adults | Motivating patients toward weight loss: practical | Can primary care physician-driven community | The management of adult obesity | Obesity, legal duties, and the family | Approaching the obese patients in primary health care | An Evidence-Based Guide for Obesity Treatment in Primary Care |
|------------------------------------------|-----------------------------------------|------------------------------------------------------------------|--------------------------------------------------------------------------|----------------------------------------------------|---------------------------------|---------------------------------------------------|---------------------------------------------|---------------------------------|---------------------------------------|-------------------------------------------------------|---------------------------------------------------------------|
| Country                                  | USA                                     | UK                                                               | UK                                                                       | USA                                                | USA                             | USA                                               | USA                                         | Canada                          | Canada                                | Czech Republic                                        | USA                                                           |
| Year                                     | 2010                                    | 2009                                                             | 2004                                                                     | 2000                                               | 2014                            | 2003                                              | 2013                                        | 2003                            | 2007                                  | 2007                                                  | 2015                                                          |
| Overview/opinion                         | Overview                                | Guideline summary                                                | Draft clinical pathway                                                   | Overview                                           | Overview                        | Overview                                          | Editorial overview                          | Overview                        | Legal overview                        | Overview                                              | Overview                                                      |
| Diagnosis                                | X                                       | X                                                                |                                                                          |                                                    | X                               | X                                                 | X                                           | X                               | X                                     | X                                                     | X                                                             |
| Co-ordination                            | X                                       | X                                                                | X                                                                        |                                                    | X                               | X                                                 | X                                           | X                               | X                                     | X                                                     | X                                                             |
| Weight and height                        | X                                       | X                                                                |                                                                          |                                                    | X                               | X                                                 |                                             | X                               |                                       | X                                                     | X                                                             |
| Waist circumference                      | X                                       | X                                                                |                                                                          |                                                    | X                               | X                                                 |                                             | X                               |                                       | X                                                     | X                                                             |
| System level/implementation              |                                         | X                                                                |                                                                          |                                                    |                                 |                                                   | X                                           |                                 |                                       |                                                       |                                                               |
| Doctor-patient relationship              |                                         | X                                                                |                                                                          | X                                                  | X                               | X                                                 |                                             |                                 | X                                     | X                                                     | X                                                             |
| Public health role                       |                                         | X                                                                |                                                                          |                                                    |                                 |                                                   | X                                           |                                 |                                       |                                                       |                                                               |
| Prevention                               |                                         | X                                                                |                                                                          |                                                    |                                 |                                                   | X                                           | X                               |                                       | X                                                     |                                                               |
| Nutrition education                      | X                                       | X                                                                | X                                                                        |                                                    | X                               | X                                                 |                                             |                                 |                                       | X                                                     | X                                                             |
| Physical activity education              | X                                       | X                                                                |                                                                          |                                                    | X                               | X                                                 |                                             |                                 |                                       | X                                                     | X                                                             |
| Behaviour modification                   | X                                       | X                                                                | X                                                                        |                                                    | X                               | X                                                 |                                             |                                 |                                       | X                                                     | X                                                             |
| Counselling/psychology                   | X                                       |                                                                  | X                                                                        |                                                    | X                               | X                                                 |                                             |                                 |                                       |                                                       |                                                               |
| Role modelling                           |                                         |                                                                  |                                                                          |                                                    |                                 |                                                   |                                             |                                 |                                       |                                                       |                                                               |
| Group based interventions                |                                         |                                                                  |                                                                          |                                                    |                                 |                                                   |                                             |                                 |                                       |                                                       |                                                               |
| Medications                              | X                                       | X                                                                |                                                                          | X                                                  | X                               | X                                                 |                                             | X                               |                                       | X                                                     |                                                               |
| Bariatric surgery referral               | X                                       | X                                                                |                                                                          |                                                    | X                               | X                                                 |                                             | X                               |                                       |                                                       |                                                               |
| Bariatric surgery work-up                |                                         |                                                                  |                                                                          |                                                    |                                 |                                                   |                                             |                                 |                                       |                                                       |                                                               |
| Bariatric surgery after care             |                                         |                                                                  |                                                                          |                                                    |                                 |                                                   |                                             |                                 |                                       |                                                       |                                                               |
| Commercial weight loss program referral  |                                         |                                                                  |                                                                          |                                                    |                                 |                                                   |                                             |                                 |                                       |                                                       |                                                               |
| Bariatric equipment in consultation room |                                         |                                                                  |                                                                          |                                                    |                                 |                                                   |                                             |                                 |                                       |                                                       |                                                               |
| Standard care undefined                  |                                         |                                                                  |                                                                          |                                                    |                                 |                                                   |                                             |                                 |                                       |                                                       |                                                               |
| Exact role uncertain                     |                                         |                                                                  |                                                                          |                                                    |                                 |                                                   |                                             |                                 |                                       |                                                       |                                                               |
| Person centredness                       |                                         | X                                                                |                                                                          |                                                    | X                               | X                                                 |                                             | X                               | X                                     | X                                                     | X                                                             |
| Whole person care                        |                                         | X                                                                |                                                                          |                                                    | X                               | X                                                 |                                             | X                               |                                       | X                                                     | X                                                             |

| Author                                   | Frank <sup>157</sup>                               | Gandjour <sup>158</sup>                                    | Grief <sup>159</sup>                                           | Grima and Dixon <sup>160</sup>                                   | Hagaman <sup>161</sup>                | Hill <sup>162</sup>                       | Hill and Wyatt <sup>163</sup>                                | Iacobucci <sup>164</sup>                              | Kausman and Bruere <sup>165</sup> | Kolasa <sup>166</sup>                                 |
|------------------------------------------|----------------------------------------------------|------------------------------------------------------------|----------------------------------------------------------------|------------------------------------------------------------------|---------------------------------------|-------------------------------------------|--------------------------------------------------------------|-------------------------------------------------------|-----------------------------------|-------------------------------------------------------|
| Title                                    | A multidisciplinary approach to obesity management | Development process of an evidence-based guideline for the | Strategies to facilitate weight loss in patients who are obese | Obesity-- recommendations for management in general practice and | FP's patients are successful "losers" | Dealing with obesity as a chronic disease | Outpatient management of obesity: a primary care perspective | Pay GPs to tackle obesity, doctors urge UK government | If not dieting, now what?         | Summary of clinical guidelines on the identification, |
| Country                                  | USA                                                | Germany                                                    | USA                                                            | Australia                                                        | USA                                   | USA                                       | USA                                                          | UK                                                    | Australia                         | USA                                                   |
| Year                                     | 1998                                               | 2001                                                       | 2010                                                           | 2013                                                             | 2010                                  | 1998                                      | 2002                                                         | 2014                                                  | 2006                              | 1999                                                  |
| Overview/opinion                         | Overview                                           | Overview                                                   | Single opinion                                                 | Overview                                                         | Single opinion                        | Overview                                  | Overview                                                     | Single opinion                                        | Overview                          | Overview                                              |
| Diagnosis                                | X                                                  | X                                                          | X                                                              | X                                                                | X                                     | X                                         | X                                                            | X                                                     | X                                 | X                                                     |
| Co-ordination                            | X                                                  | X                                                          | X                                                              | X                                                                | X                                     | X                                         | X                                                            | X                                                     | X                                 | X                                                     |
| Weight and height                        |                                                    | X                                                          | X                                                              | X                                                                |                                       | X                                         | X                                                            | X                                                     |                                   | X                                                     |
| Waist circumference                      |                                                    |                                                            | X                                                              | X                                                                |                                       | X                                         | X                                                            | X                                                     |                                   | X                                                     |
| System level/implementation              |                                                    |                                                            |                                                                |                                                                  |                                       |                                           |                                                              | X                                                     |                                   |                                                       |
| Doctor-patient relationship              |                                                    |                                                            |                                                                | X                                                                | X                                     |                                           | X                                                            |                                                       | X                                 | X                                                     |
| Public health role                       |                                                    |                                                            |                                                                |                                                                  |                                       |                                           |                                                              | X                                                     |                                   |                                                       |
| Prevention                               |                                                    |                                                            |                                                                |                                                                  |                                       |                                           |                                                              |                                                       |                                   |                                                       |
| Nutrition education                      |                                                    |                                                            |                                                                | X                                                                |                                       |                                           | X                                                            |                                                       | X                                 |                                                       |
| Physical activity education              |                                                    |                                                            |                                                                | X                                                                |                                       |                                           | X                                                            |                                                       |                                   |                                                       |
| Behaviour modification                   |                                                    |                                                            | X                                                              | X                                                                |                                       |                                           | X                                                            |                                                       | X                                 |                                                       |
| Counselling/psychology                   |                                                    |                                                            |                                                                | X                                                                |                                       |                                           | X                                                            |                                                       | X                                 |                                                       |
| Role modelling                           |                                                    |                                                            |                                                                |                                                                  | X                                     |                                           |                                                              |                                                       |                                   |                                                       |
| Group based interventions                |                                                    |                                                            | X                                                              |                                                                  |                                       |                                           |                                                              |                                                       |                                   |                                                       |
| Medications                              | X                                                  | X                                                          |                                                                | X                                                                |                                       |                                           | X                                                            |                                                       |                                   |                                                       |
| Bariatric surgery referral               | X                                                  | X                                                          |                                                                | X                                                                |                                       |                                           | X                                                            | X                                                     |                                   |                                                       |
| Bariatric surgery work-up                |                                                    |                                                            |                                                                |                                                                  |                                       |                                           |                                                              |                                                       |                                   |                                                       |
| Bariatric surgery after care             |                                                    |                                                            |                                                                |                                                                  |                                       |                                           |                                                              |                                                       |                                   |                                                       |
| Commercial weight loss program referral  |                                                    |                                                            |                                                                |                                                                  |                                       |                                           |                                                              |                                                       |                                   |                                                       |
| Bariatric equipment in consultation room |                                                    |                                                            |                                                                |                                                                  |                                       |                                           | X                                                            |                                                       |                                   |                                                       |
| Standard care undefined                  |                                                    |                                                            |                                                                |                                                                  |                                       |                                           |                                                              | X                                                     |                                   |                                                       |
| Exact role uncertain                     |                                                    | X                                                          |                                                                |                                                                  |                                       |                                           |                                                              |                                                       |                                   | X                                                     |
| Person centredness                       |                                                    |                                                            | X                                                              |                                                                  | X                                     |                                           | X                                                            |                                                       | X                                 | X                                                     |
| Whole person care                        |                                                    |                                                            |                                                                | X                                                                | X                                     |                                           | X                                                            |                                                       |                                   |                                                       |

| Author                                   | Kushner <sup>167</sup>                                 | Landau and Moulton <sup>168</sup>                 | Lenfant <sup>169</sup>                                                                  | Maryon-Davis <sup>170</sup>                                           | Mogul <sup>171</sup>                                             | Newton et al <sup>172</sup>                                      | Nichols and Bazemore <sup>173</sup>                   | Nonas <sup>174</sup>                                          | Orzano and Scott <sup>175</sup>                          | Ossolinski et al <sup>176</sup>                          |
|------------------------------------------|--------------------------------------------------------|---------------------------------------------------|-----------------------------------------------------------------------------------------|-----------------------------------------------------------------------|------------------------------------------------------------------|------------------------------------------------------------------|-------------------------------------------------------|---------------------------------------------------------------|----------------------------------------------------------|----------------------------------------------------------|
| Title                                    | Tackling obesity: is primary care up to the challenge? | General principles in the primary care of obesity | Physicians need practical tools to treat the complex problems of overweight and obesity | Weight management in primary care: How can it be made more effective? | New Perspectives on Diagnosis and Treatment of Obesity: Winnable | Supporting behavior change in overweight patients: A guide for t | Winnable battles: Family physicians play an essential | A model for chronic care of obesity through dietary treatment | Diagnosis and treatment of obesity in adults: an applied | Weight management practices and evidence for weight loss |
| Country                                  | USA                                                    | USA                                               | USA                                                                                     | UK                                                                    | USA                                                              | USA                                                              | USA                                                   | USA                                                           | USA                                                      | Australia                                                |
| Year                                     | 2010                                                   | 1992                                              | 2001                                                                                    | 2005                                                                  | 1999                                                             | 2008                                                             | 2014                                                  | 1998                                                          | 2004                                                     | 2015                                                     |
| Overview/opinion                         | Editorial                                              | Overview                                          | Editorial                                                                               | Overview                                                              | Overview                                                         | Overview                                                         | Editorial                                             | Overview                                                      | Overview                                                 | Overview                                                 |
| Diagnosis                                | X                                                      | X                                                 | X                                                                                       | X                                                                     | X                                                                | X                                                                | X                                                     | X                                                             | X                                                        | X                                                        |
| Co-ordination                            | X                                                      |                                                   |                                                                                         | X                                                                     |                                                                  | X                                                                | X                                                     | X                                                             | X                                                        | X                                                        |
| Weight and height                        | X                                                      |                                                   | X                                                                                       |                                                                       | X                                                                |                                                                  |                                                       |                                                               | X                                                        | X                                                        |
| Waist circumference                      |                                                        |                                                   | X                                                                                       |                                                                       | X                                                                |                                                                  |                                                       |                                                               |                                                          | X                                                        |
| System level/implementation              | X                                                      |                                                   |                                                                                         |                                                                       |                                                                  |                                                                  | X                                                     |                                                               |                                                          |                                                          |
| Doctor-patient relationship              |                                                        | X                                                 | X                                                                                       |                                                                       |                                                                  | X                                                                |                                                       |                                                               | X                                                        |                                                          |
| Public health role                       | X                                                      |                                                   |                                                                                         |                                                                       |                                                                  |                                                                  | X                                                     |                                                               |                                                          |                                                          |
| Prevention                               | X                                                      |                                                   |                                                                                         |                                                                       |                                                                  |                                                                  |                                                       |                                                               |                                                          |                                                          |
| Nutrition education                      | X                                                      | X                                                 | X                                                                                       | X                                                                     | X                                                                | X                                                                |                                                       |                                                               | X                                                        | X                                                        |
| Physical activity education              | X                                                      | X                                                 | X                                                                                       | X                                                                     | X                                                                | X                                                                |                                                       |                                                               | X                                                        | X                                                        |
| Behaviour modification                   | X                                                      | X                                                 | X                                                                                       |                                                                       | X                                                                | X                                                                |                                                       | X                                                             | X                                                        |                                                          |
| Counselling/psychology                   | X                                                      | X                                                 |                                                                                         |                                                                       |                                                                  | X                                                                |                                                       |                                                               |                                                          |                                                          |
| Role modelling                           |                                                        |                                                   |                                                                                         |                                                                       |                                                                  |                                                                  |                                                       |                                                               |                                                          |                                                          |
| Group based interventions                | X                                                      |                                                   |                                                                                         |                                                                       |                                                                  |                                                                  |                                                       |                                                               |                                                          |                                                          |
| Medications                              | X                                                      | X                                                 | X                                                                                       | X                                                                     | X                                                                | X                                                                |                                                       | X                                                             | X                                                        | X                                                        |
| Bariatric surgery referral               |                                                        | X                                                 | X                                                                                       | X                                                                     | X                                                                | X                                                                |                                                       |                                                               | X                                                        | X                                                        |
| Bariatric surgery work-up                |                                                        |                                                   |                                                                                         |                                                                       |                                                                  |                                                                  |                                                       |                                                               |                                                          |                                                          |
| Bariatric surgery after care             |                                                        |                                                   |                                                                                         |                                                                       |                                                                  |                                                                  |                                                       |                                                               |                                                          |                                                          |
| Commercial weight loss program referral  |                                                        |                                                   |                                                                                         | X                                                                     |                                                                  |                                                                  |                                                       |                                                               |                                                          | X                                                        |
| Bariatric equipment in consultation room |                                                        |                                                   |                                                                                         |                                                                       |                                                                  |                                                                  |                                                       |                                                               |                                                          |                                                          |
| Standard care undefined                  | X                                                      |                                                   |                                                                                         |                                                                       |                                                                  |                                                                  |                                                       |                                                               |                                                          | X                                                        |
| Exact role uncertain                     |                                                        |                                                   |                                                                                         |                                                                       | X                                                                |                                                                  | X                                                     |                                                               |                                                          |                                                          |
| Person centredness                       |                                                        | X                                                 | X                                                                                       |                                                                       |                                                                  | X                                                                | X                                                     | X                                                             | X                                                        |                                                          |
| Whole person care                        |                                                        | X                                                 | X                                                                                       |                                                                       |                                                                  |                                                                  | X                                                     | X                                                             | X                                                        |                                                          |



| Author                                   | Plourde et al <sup>177</sup>               | Rao et al <sup>178</sup>                               | Robinson et al <sup>179</sup>                             | Ruser et al <sup>180</sup>                                | Scherger <sup>181</sup>                                                 | Schlair et al <sup>182</sup>                                   | Spira <sup>183</sup>                 | Thompson et al <sup>184</sup> | Tsai et al <sup>185</sup> |
|------------------------------------------|--------------------------------------------|--------------------------------------------------------|-----------------------------------------------------------|-----------------------------------------------------------|-------------------------------------------------------------------------|----------------------------------------------------------------|--------------------------------------|-------------------------------|---------------------------|
| Title                                    | Managing obesity in adults in primary care | New and emerging weight management strategies for busy | Obesity: a move from traditional to more patient-oriented | Whittling away at obesity and overweight: Small lifestyle | Primary care physicians: On the front line in the fight against obesity | How to deliver high-quality obesity counseling in primary care | Managing obesity in general practice | Treatment of obesity          | Obesity                   |
| Country                                  | Canada                                     | USA                                                    | USA                                                       | USA                                                       | USA                                                                     | USA                                                            | UK                                   | USA                           | USA                       |
| Year                                     | 2012                                       | 2011                                                   | 1995                                                      | 2005                                                      | 1999                                                                    | 2012                                                           | 1983                                 | 2007                          | 2010                      |
| Overview/opinion                         | Overview                                   | Overview                                               | Overview                                                  | Overview                                                  | Overview                                                                | Overview                                                       | Single opinion                       | Overview                      | Overview                  |
| Diagnosis                                | X                                          | X                                                      | X                                                         | X                                                         | X                                                                       | X                                                              | X                                    | X                             | X                         |
| Co-ordination                            | X                                          | X                                                      |                                                           | X                                                         | X                                                                       |                                                                |                                      |                               | X                         |
| Weight and height                        | X                                          |                                                        |                                                           | X                                                         | X                                                                       | X                                                              |                                      | X                             | X                         |
| Waist circumference                      | X                                          |                                                        |                                                           | X                                                         | X                                                                       | X                                                              |                                      | X                             | X                         |
| System level/implementation              |                                            |                                                        |                                                           |                                                           |                                                                         |                                                                |                                      |                               |                           |
| Doctor-patient relationship              |                                            |                                                        | X                                                         |                                                           |                                                                         |                                                                | X                                    |                               | X                         |
| Public health role                       |                                            |                                                        |                                                           |                                                           |                                                                         |                                                                |                                      |                               | X                         |
| Prevention                               |                                            |                                                        |                                                           | X                                                         |                                                                         |                                                                |                                      |                               |                           |
| Nutrition education                      | X                                          |                                                        | X                                                         | X                                                         | X                                                                       | X                                                              | X                                    | X                             | X                         |
| Physical activity education              | X                                          |                                                        | X                                                         | X                                                         | X                                                                       | X                                                              | X                                    | X                             | X                         |
| Behaviour modification                   | X                                          |                                                        |                                                           | X                                                         | X                                                                       | X                                                              | X                                    | X                             | X                         |
| Counselling/psychology                   | X                                          |                                                        | X                                                         |                                                           |                                                                         | X                                                              |                                      |                               | X                         |
| Role modelling                           |                                            |                                                        |                                                           |                                                           |                                                                         |                                                                |                                      |                               |                           |
| Group based interventions                |                                            |                                                        |                                                           |                                                           |                                                                         | X                                                              |                                      |                               |                           |
| Medications                              | X                                          | X                                                      |                                                           | X                                                         | X                                                                       | X                                                              | X                                    | X                             | X                         |
| Bariatric surgery referral               | X                                          |                                                        | X                                                         | X                                                         |                                                                         | X                                                              | X                                    | X                             |                           |
| Bariatric surgery work-up                |                                            |                                                        |                                                           |                                                           |                                                                         |                                                                |                                      |                               |                           |
| Bariatric surgery after care             |                                            |                                                        |                                                           |                                                           |                                                                         |                                                                |                                      |                               |                           |
| Commercial weight loss program referral  |                                            |                                                        |                                                           |                                                           |                                                                         |                                                                | X                                    |                               |                           |
| Bariatric equipment in consultation room |                                            |                                                        |                                                           |                                                           |                                                                         |                                                                |                                      |                               |                           |
| Standard care undefined                  |                                            |                                                        |                                                           |                                                           |                                                                         |                                                                |                                      |                               |                           |
| Exact role uncertain                     |                                            | X                                                      |                                                           |                                                           |                                                                         |                                                                |                                      |                               |                           |
| Person centredness                       |                                            |                                                        | X                                                         |                                                           |                                                                         | X                                                              |                                      |                               |                           |
| Whole person care                        |                                            |                                                        | X                                                         |                                                           | X                                                                       |                                                                |                                      |                               | X                         |

| Author | Yanovski <sup>186</sup> | Australian Medical Association <sup>187</sup> | Zwar and Harris <sup>188</sup> | Hainer <sup>189</sup> | Seidell et al <sup>190</sup> | Anderson <sup>191</sup> | Jarvis <sup>192</sup> | Lowery <sup>193</sup> | Van Avendonk et al <sup>194</sup> | Al-Quaiz <sup>195</sup> | Carvajal et al <sup>196</sup> | Kushner and Ryan <sup>197</sup> | Obesity Australia <sup>198</sup> |
|--------|-------------------------|-----------------------------------------------|--------------------------------|-----------------------|------------------------------|-------------------------|-----------------------|-----------------------|-----------------------------------|-------------------------|-------------------------------|---------------------------------|----------------------------------|
|        |                         |                                               |                                |                       |                              |                         |                       |                       |                                   |                         |                               |                                 |                                  |

| Title                                    | A practical approach to treatment of the obese patient | Your Family Doctor – Keeping You Healthy AMA FAMILY DOCTOR | Are GPs doing enough to help patients | How should the obese patient be managed? | An integrated health care standard for | Reducing overweight and obesity: Closing the gap between | Obesity and the overworked GP | Medical home concept: Policy | Primary care and public health a natural | Current concepts in the management | Managing obesity in primary care | Assessment and lifestyle management of patients | The mission of Obesity Australia is to drive change in the public |
|------------------------------------------|--------------------------------------------------------|------------------------------------------------------------|---------------------------------------|------------------------------------------|----------------------------------------|----------------------------------------------------------|-------------------------------|------------------------------|------------------------------------------|------------------------------------|----------------------------------|-------------------------------------------------|-------------------------------------------------------------------|
| Country                                  | USA                                                    | Australia                                                  | Australia                             | Czech Republic                           | Netherlands                            | Spain                                                    | UK                            | USA                          | Netherlands                              | Saudi Arabia                       | USA                              | USA                                             | Australia                                                         |
| Year                                     | 1993                                                   | 2014                                                       | 2013                                  | 1999                                     | 2012                                   | 2008                                                     | 2006                          | 2010                         | 2012                                     | 2001                               | 2013                             | 2014                                            | 2013                                                              |
| Overview/opinion                         | Overview                                               | Media release                                              | Blog                                  | Overview                                 | Overview                               | Overview                                                 | Overview                      | Overview                     | Overview                                 | Overview                           | Overview                         | Overview                                        | Statement                                                         |
| Diagnosis                                | X                                                      | X                                                          | X                                     | X                                        | X                                      | X                                                        | X                             | X                            | X                                        | X                                  | X                                | X                                               | X                                                                 |
| Co-ordination                            | X                                                      |                                                            | X                                     | X                                        | X                                      | X                                                        | X                             | X                            | X                                        | X                                  | X                                | X                                               | X                                                                 |
| Weight and height                        | X                                                      |                                                            |                                       | X                                        | X                                      | X                                                        | X                             |                              | X                                        | X                                  | X                                | X                                               | X                                                                 |
| Waist circumference                      | X                                                      |                                                            |                                       |                                          | X                                      |                                                          | X                             |                              | X                                        | X                                  |                                  | X                                               |                                                                   |
| System level/implementation              |                                                        |                                                            |                                       |                                          |                                        | X                                                        | X                             | X                            | X                                        |                                    |                                  |                                                 |                                                                   |
| Doctor-patient relationship              | X                                                      |                                                            |                                       |                                          | X                                      |                                                          | X                             |                              | X                                        | X                                  | X                                |                                                 |                                                                   |
| Public health role                       |                                                        |                                                            |                                       |                                          |                                        | X                                                        | X                             |                              | X                                        |                                    |                                  |                                                 |                                                                   |
| Prevention                               |                                                        |                                                            |                                       |                                          | X                                      |                                                          | X                             |                              | X                                        |                                    |                                  |                                                 |                                                                   |
| Nutrition education                      | X                                                      | X                                                          |                                       | X                                        | X                                      | X                                                        | X                             |                              | X                                        | X                                  |                                  | X                                               |                                                                   |
| Physical activity education              | X                                                      | X                                                          |                                       | X                                        | X                                      | X                                                        | X                             |                              | X                                        | X                                  |                                  | X                                               |                                                                   |
| Behaviour modification                   | X                                                      |                                                            |                                       |                                          | X                                      | X                                                        | X                             |                              | X                                        | X                                  |                                  | X                                               |                                                                   |
| Counselling/psychology                   | X                                                      |                                                            |                                       |                                          |                                        |                                                          |                               |                              |                                          |                                    |                                  |                                                 |                                                                   |
| Role modelling                           |                                                        |                                                            |                                       |                                          |                                        |                                                          |                               |                              |                                          |                                    |                                  |                                                 |                                                                   |
| Group based interventions                | X                                                      |                                                            |                                       |                                          |                                        |                                                          |                               |                              |                                          |                                    |                                  |                                                 |                                                                   |
| Medications                              | X                                                      |                                                            |                                       |                                          |                                        |                                                          |                               |                              |                                          | X                                  | X                                | X                                               |                                                                   |
| Bariatric surgery referral               | X                                                      |                                                            | X                                     | X                                        |                                        |                                                          |                               |                              | X                                        | X                                  | X                                | X                                               | X                                                                 |
| Bariatric surgery work-up                |                                                        |                                                            |                                       |                                          |                                        |                                                          |                               |                              |                                          |                                    |                                  |                                                 |                                                                   |
| Bariatric surgery after care             |                                                        |                                                            |                                       |                                          |                                        |                                                          |                               |                              |                                          |                                    |                                  |                                                 |                                                                   |
| Commercial weight loss program referral  | X                                                      |                                                            |                                       |                                          |                                        |                                                          |                               |                              |                                          |                                    | X                                | X                                               | X                                                                 |
| Bariatric equipment in consultation room |                                                        |                                                            |                                       |                                          |                                        |                                                          |                               |                              |                                          |                                    |                                  |                                                 |                                                                   |
| Standard care undefined                  |                                                        |                                                            |                                       |                                          |                                        |                                                          |                               |                              |                                          |                                    |                                  |                                                 |                                                                   |
| Exact role uncertain                     |                                                        | X                                                          | X                                     |                                          | X                                      | X                                                        | X                             | X                            |                                          | X                                  | X                                | X                                               | X                                                                 |
| Person centredness                       | X                                                      |                                                            |                                       |                                          |                                        |                                                          |                               |                              | X                                        |                                    |                                  |                                                 |                                                                   |
| Whole person care                        |                                                        |                                                            |                                       |                                          |                                        | X                                                        | X                             |                              | X                                        |                                    | X                                |                                                 |                                                                   |

**TABLE 4: Current practice articles on the role of the family doctor in the management of adult obesity in primary care (over 3 pages)**

| Author | Bourn <sup>199</sup> | Alexander et al <sup>200</sup> | Alexander et al <sup>201</sup> | Klumbiene et al <sup>202</sup> | Linne et al <sup>203</sup> | Patterson et al <sup>204</sup> | Hoyt <sup>205</sup> | Fransen et al <sup>206</sup> | Cohen et al <sup>207</sup> | Fobi et al <sup>208</sup> |
|--------|----------------------|--------------------------------|--------------------------------|--------------------------------|----------------------------|--------------------------------|---------------------|------------------------------|----------------------------|---------------------------|
|        |                      |                                |                                |                                |                            |                                |                     |                              |                            |                           |

| Title                                       | Tackling Obesity in England | Do the five A's work when physicians counsel about | Weight-loss talks: what works (and what doesn't) | Advising overweight persons about diet and physical activity.in | Success rate of Orlistat in primary-care practice is limited by failure to follow prescribing | Prescribing for weight loss in primary care: Evidence | Person, place, and prevention in primary care: A multilevel | The development of a minimal intervention strategy to | Laparoscopic Roux-en-Y gastric bypass for BMI <35 kg/m <sup>2</sup> - a | Gastric bypass in patients |
|---------------------------------------------|-----------------------------|----------------------------------------------------|--------------------------------------------------|-----------------------------------------------------------------|-----------------------------------------------------------------------------------------------|-------------------------------------------------------|-------------------------------------------------------------|-------------------------------------------------------|-------------------------------------------------------------------------|----------------------------|
| Country                                     | England                     | USA                                                | USA                                              | Lithuania                                                       | Sweden                                                                                        | Northern Ireland                                      | USA                                                         | The Netherlands                                       | USA                                                                     | Brazil                     |
| Year                                        | 2001                        | 2011                                               | 2011                                             | 2006                                                            | 2003                                                                                          | 2013                                                  | 2013                                                        | 2008                                                  | 2006                                                                    | 2002                       |
| Methodology                                 | Government report           | Qualitative                                        | Qualitative                                      | Survey                                                          | Survey                                                                                        | Audit                                                 | Survey                                                      | Qualitative                                           | Audit                                                                   | Audit                      |
| Diagnosis                                   | X                           | X                                                  | X                                                |                                                                 | X                                                                                             |                                                       | X                                                           | X                                                     | X                                                                       | X                          |
| Co-ordination                               | X                           | X                                                  |                                                  |                                                                 | X                                                                                             |                                                       | X                                                           | X                                                     | X                                                                       | X                          |
| Weight and height                           |                             | X                                                  |                                                  |                                                                 | X                                                                                             |                                                       | X                                                           | X                                                     |                                                                         |                            |
| Waist circumference                         |                             |                                                    |                                                  |                                                                 |                                                                                               |                                                       |                                                             | X                                                     |                                                                         |                            |
| System level/implementation                 | X                           |                                                    |                                                  |                                                                 |                                                                                               |                                                       | X                                                           | X                                                     |                                                                         |                            |
| Doctor-patient relationship                 |                             |                                                    |                                                  |                                                                 |                                                                                               |                                                       |                                                             | X                                                     |                                                                         |                            |
| Public health role                          |                             |                                                    |                                                  |                                                                 |                                                                                               |                                                       | X                                                           |                                                       |                                                                         |                            |
| Prevention                                  |                             |                                                    |                                                  |                                                                 |                                                                                               |                                                       | X                                                           |                                                       |                                                                         |                            |
| Nutrition education                         | X                           | X                                                  | X                                                |                                                                 | X                                                                                             |                                                       | X                                                           | X                                                     |                                                                         |                            |
| Physical activity education                 | X                           | X                                                  | X                                                |                                                                 |                                                                                               |                                                       | X                                                           | X                                                     |                                                                         |                            |
| Behaviour modification                      |                             | X                                                  |                                                  |                                                                 |                                                                                               |                                                       | X                                                           | X                                                     |                                                                         |                            |
| Counselling/psychology                      |                             |                                                    |                                                  |                                                                 |                                                                                               |                                                       | X                                                           |                                                       |                                                                         |                            |
| Role modelling                              |                             |                                                    |                                                  |                                                                 |                                                                                               |                                                       |                                                             |                                                       |                                                                         |                            |
| Group based interventions                   |                             |                                                    |                                                  |                                                                 |                                                                                               |                                                       |                                                             |                                                       |                                                                         |                            |
| Medications                                 | X                           |                                                    |                                                  |                                                                 | X                                                                                             | X                                                     |                                                             |                                                       |                                                                         |                            |
| Bariatric surgery referral                  | X                           |                                                    |                                                  |                                                                 |                                                                                               |                                                       |                                                             |                                                       | X                                                                       |                            |
| Bariatric surgery work-up                   |                             |                                                    |                                                  |                                                                 |                                                                                               |                                                       |                                                             |                                                       |                                                                         |                            |
| Bariatric surgery after care                |                             |                                                    |                                                  |                                                                 |                                                                                               |                                                       |                                                             |                                                       |                                                                         |                            |
| Commercial weight loss program referral     |                             |                                                    |                                                  |                                                                 |                                                                                               |                                                       |                                                             |                                                       |                                                                         |                            |
| Bariatric equipment in consultation room    |                             |                                                    |                                                  |                                                                 |                                                                                               |                                                       |                                                             |                                                       |                                                                         |                            |
| Standard care undefined                     |                             |                                                    |                                                  |                                                                 | X                                                                                             |                                                       |                                                             |                                                       |                                                                         |                            |
| Exact role uncertain                        | X                           |                                                    |                                                  |                                                                 |                                                                                               |                                                       | X                                                           |                                                       |                                                                         |                            |
| Person centredness                          |                             |                                                    |                                                  |                                                                 |                                                                                               |                                                       |                                                             | X                                                     |                                                                         |                            |
| Whole person care                           |                             |                                                    |                                                  |                                                                 |                                                                                               |                                                       |                                                             | X                                                     | X                                                                       |                            |
| Under-recognition/under-treatment mentioned | X                           |                                                    |                                                  | X                                                               | X                                                                                             |                                                       |                                                             | X                                                     |                                                                         |                            |

|        |                            |                                |                                 |                       |                               |                                   |                             |                             |                            |                              |                                |
|--------|----------------------------|--------------------------------|---------------------------------|-----------------------|-------------------------------|-----------------------------------|-----------------------------|-----------------------------|----------------------------|------------------------------|--------------------------------|
| Author | Kloek et al <sup>209</sup> | Antognoli et al <sup>210</sup> | Nursing Standard <sup>211</sup> | Binnie <sup>212</sup> | Bramlage et al <sup>213</sup> | Kraschnewski et al <sup>214</sup> | Morris et al <sup>215</sup> | Sammut et al <sup>216</sup> | Smith et al <sup>217</sup> | Sonntag et al <sup>218</sup> | Timmerman et al <sup>219</sup> |
|--------|----------------------------|--------------------------------|---------------------------------|-----------------------|-------------------------------|-----------------------------------|-----------------------------|-----------------------------|----------------------------|------------------------------|--------------------------------|

| Title                                       | Dutch General Practitioners' weight management policy for | Direct observation of weight counselling in primary care. | GPs failing to offer weight-loss advice to people | Ten-year follow-up of obesity | Recognition and management of overweight and obesity | A silent response to the obesity epidemic: Decline in US physician | Who gets what treatment for obesity? A survey of | Audit of the diagnosis and management of adult | U.S. Primary care physicians' diet-, physical | Counseling overweight patients: Analysis of preventive | Weight management practices among primary care |
|---------------------------------------------|-----------------------------------------------------------|-----------------------------------------------------------|---------------------------------------------------|-------------------------------|------------------------------------------------------|--------------------------------------------------------------------|--------------------------------------------------|------------------------------------------------|-----------------------------------------------|--------------------------------------------------------|------------------------------------------------|
| Country                                     | The Netherlands                                           | USA                                                       | UK                                                | UK                            | Germany                                              | USA                                                                | Scotland                                         | Malta                                          | USA                                           | Germany                                                | USA                                            |
| Year                                        | 2014                                                      | 2014                                                      | 2015                                              | 1977                          | 2004                                                 | 2013                                                               | 1999                                             | 2012                                           | 2011                                          | 2010                                                   | 2000                                           |
| Methodology                                 | Cross sectional survey                                    | Direct observation                                        | Editorial                                         | Clinical audit                | Cross sectional survey                               | Clinical audit                                                     | Cross sectional survey                           | Clinical audit                                 | Clinical audit                                | Cross sectional survey                                 | Cross sectional survey                         |
| Diagnosis                                   | X                                                         | X                                                         | X                                                 | X                             | X                                                    | X                                                                  | X                                                | X                                              | X                                             | X                                                      | X                                              |
| Co-ordination                               | X                                                         | X                                                         |                                                   |                               | X                                                    |                                                                    | X                                                | X                                              |                                               | X                                                      | X                                              |
| Weight and height                           | X                                                         | X                                                         |                                                   | X                             | X                                                    |                                                                    | X                                                | X                                              | X                                             | X                                                      |                                                |
| Waist circumference                         | X                                                         | X                                                         |                                                   |                               |                                                      |                                                                    |                                                  | X                                              | X                                             |                                                        |                                                |
| System level/implementation                 |                                                           |                                                           |                                                   |                               |                                                      |                                                                    |                                                  |                                                |                                               |                                                        |                                                |
| Doctor-patient relationship                 | X                                                         |                                                           |                                                   | X                             |                                                      |                                                                    |                                                  |                                                |                                               | X                                                      |                                                |
| Public health role                          |                                                           |                                                           |                                                   |                               |                                                      |                                                                    |                                                  |                                                |                                               |                                                        |                                                |
| Prevention                                  |                                                           |                                                           |                                                   |                               |                                                      |                                                                    | X                                                |                                                |                                               |                                                        |                                                |
| Nutrition education                         | X                                                         | X                                                         | X                                                 | X                             | X                                                    | X                                                                  | X                                                | X                                              | X                                             | X                                                      | X                                              |
| Physical activity education                 | X                                                         | X                                                         | X                                                 |                               | X                                                    | X                                                                  | X                                                | X                                              | X                                             | X                                                      | X                                              |
| Behaviour modification                      |                                                           | X                                                         | X                                                 |                               |                                                      |                                                                    | X                                                | X                                              | X                                             | X                                                      | X                                              |
| Counselling/psychology                      |                                                           |                                                           |                                                   |                               |                                                      |                                                                    | X                                                |                                                |                                               |                                                        |                                                |
| Role modelling                              |                                                           |                                                           |                                                   |                               |                                                      |                                                                    |                                                  |                                                |                                               |                                                        |                                                |
| Group based interventions                   |                                                           | X                                                         |                                                   |                               |                                                      |                                                                    | X                                                |                                                |                                               |                                                        | X                                              |
| Medications                                 | X                                                         | X                                                         | X                                                 | X                             |                                                      |                                                                    | X                                                | X                                              | X                                             |                                                        | X                                              |
| Bariatric surgery referral                  |                                                           | X                                                         |                                                   |                               |                                                      |                                                                    | X                                                | X                                              | X                                             |                                                        |                                                |
| Bariatric surgery work-up                   |                                                           |                                                           |                                                   |                               |                                                      |                                                                    |                                                  |                                                |                                               |                                                        |                                                |
| Bariatric surgery after care                |                                                           |                                                           |                                                   |                               |                                                      |                                                                    |                                                  |                                                |                                               |                                                        |                                                |
| Commercial weight loss program referral     |                                                           | X                                                         |                                                   |                               |                                                      |                                                                    | X                                                |                                                |                                               |                                                        | X                                              |
| Bariatric equipment in consultation room    |                                                           |                                                           |                                                   |                               |                                                      |                                                                    |                                                  |                                                |                                               |                                                        |                                                |
| Standard care undefined                     |                                                           |                                                           |                                                   |                               |                                                      |                                                                    |                                                  |                                                |                                               |                                                        |                                                |
| Exact role uncertain                        |                                                           |                                                           |                                                   |                               |                                                      | X                                                                  |                                                  |                                                |                                               |                                                        |                                                |
| Person centredness                          |                                                           |                                                           |                                                   |                               |                                                      |                                                                    |                                                  |                                                |                                               |                                                        |                                                |
| Whole person care                           | X                                                         | X                                                         |                                                   |                               |                                                      |                                                                    |                                                  |                                                |                                               |                                                        |                                                |
| Under-recognition/under-treatment mentioned | X                                                         |                                                           | X                                                 |                               | X                                                    | X                                                                  |                                                  |                                                | X                                             | X                                                      | X                                              |

| Author                                      | Gaglioti et al <sup>220</sup>             | Morris and Gravelle <sup>221</sup> | Huber et al <sup>222</sup>                                                                     | Asselin et al <sup>223</sup>                                                     |
|---------------------------------------------|-------------------------------------------|------------------------------------|------------------------------------------------------------------------------------------------|----------------------------------------------------------------------------------|
| Title                                       | Primary care's ecologic impact on obesity | GP supply and obesity              | Obesity management and continuing medical education in primary care: Results of a Swiss survey | Missing an opportunity: the embedded nature of weight management in primary care |
| Country                                     | USA                                       | UK                                 | Switzerland                                                                                    | Canada                                                                           |
| Year                                        | 2009                                      | 2008                               | 2011                                                                                           | 2015                                                                             |
| Methodology                                 | Epidemiology                              | Cross sectional survey             | Cross sectional survey                                                                         | Qualitative                                                                      |
| Diagnosis                                   | X                                         | X                                  | X                                                                                              | X                                                                                |
| Co-ordination                               |                                           |                                    | X                                                                                              | X                                                                                |
| Weight and height                           |                                           |                                    | X                                                                                              | X                                                                                |
| Waist circumference                         |                                           |                                    | X                                                                                              |                                                                                  |
| System level/implementation                 | X                                         |                                    |                                                                                                | X                                                                                |
| Doctor-patient relationship                 |                                           |                                    |                                                                                                |                                                                                  |
| Public health role                          | X                                         |                                    |                                                                                                |                                                                                  |
| Prevention                                  | X                                         |                                    |                                                                                                |                                                                                  |
| Nutrition education                         |                                           |                                    | X                                                                                              | X                                                                                |
| Physical activity education                 |                                           |                                    | X                                                                                              | X                                                                                |
| Behaviour modification                      |                                           |                                    | X                                                                                              | X                                                                                |
| Counselling/psychology                      |                                           |                                    |                                                                                                |                                                                                  |
| Role modelling                              |                                           |                                    |                                                                                                |                                                                                  |
| Group based interventions                   |                                           |                                    |                                                                                                |                                                                                  |
| Medications                                 |                                           |                                    |                                                                                                |                                                                                  |
| Bariatric surgery referral                  |                                           |                                    |                                                                                                |                                                                                  |
| Bariatric surgery work-up                   |                                           |                                    |                                                                                                |                                                                                  |
| Bariatric surgery after care                |                                           |                                    |                                                                                                |                                                                                  |
| Commercial weight loss program referral     |                                           |                                    |                                                                                                |                                                                                  |
| Bariatric equipment in consultation room    |                                           |                                    |                                                                                                |                                                                                  |
| Standard care undefined                     |                                           |                                    |                                                                                                |                                                                                  |
| Exact role uncertain                        | X                                         | X                                  |                                                                                                | X                                                                                |
| Person centredness                          |                                           |                                    |                                                                                                | X                                                                                |
| Whole person care                           |                                           |                                    |                                                                                                | X                                                                                |
| Under-recognition/under-treatment mentioned |                                           |                                    |                                                                                                | X                                                                                |

**TABLE 5: International guidelines on the management of adult obesity in primary care, the role of the family doctor (FD) (over 2 pages)**

| Guideline                                                                                                                                                                                                                    | Country     | Year | Intended for a FD audience ?    | FD mentioned | Primary healthcare mentioned | FD – measure the patient | FD – nutrition/ physical activity advice | FD– behavioural supports | FD- Frequency of visits mentioned | FD- Advice on use of intensive treatments | FD – referral to allied health | FD- referral to specialist obesity services | Does not mention specific role for FD |
|------------------------------------------------------------------------------------------------------------------------------------------------------------------------------------------------------------------------------|-------------|------|---------------------------------|--------------|------------------------------|--------------------------|------------------------------------------|--------------------------|-----------------------------------|-------------------------------------------|--------------------------------|---------------------------------------------|---------------------------------------|
| RACGP SNAP – Overweight and obesity, 2nd edition <sup>224</sup>                                                                                                                                                              | Australia   | 2015 | X                               | X            | X                            | X                        | X                                        |                          | X                                 | X                                         | X                              |                                             |                                       |
| National Institute for Health and Care Excellence “Managing adults who are overweight or obese” <sup>225</sup>                                                                                                               | UK          | 2015 | X                               |              |                              |                          |                                          |                          |                                   |                                           |                                |                                             | X                                     |
| Recommendations for prevention of weight gain and use of behavioural and pharmacologic interventions to manage overweight and obesity in adults in primary care Canadian Task Force on Preventive Health Care <sup>226</sup> | Canada      | 2015 | X                               |              | X                            |                          |                                          |                          |                                   |                                           |                                |                                             | X                                     |
| Clinical practice guidelines for the management of overweight and obesity in adults, adolescents and children in Australia <sup>2</sup>                                                                                      | Australia   | 2013 | X                               | X            | X                            | X                        |                                          | X                        | X                                 | X                                         | X                              | X                                           |                                       |
| Institute for Clinical Systems Improvement Health Care Guideline Prevention and Management of Obesity for Adults <sup>227</sup>                                                                                              | USA         | 2013 | X                               |              | X                            |                          |                                          |                          |                                   |                                           |                                |                                             | X                                     |
| Guideline for the Management of Overweight and Obesity in Adults<br>A Report of the American College of Cardiology/American Heart Association Task Force on Practice Guidelines and The Obesity Society <sup>228</sup>       | USA         | 2013 | Primary care Practitioner (PCP) | PCP          | X                            |                          |                                          |                          |                                   |                                           |                                |                                             | X                                     |
| New Zealand Primary Care Handbook 2012 – Weight Management <sup>229</sup>                                                                                                                                                    | New Zealand | 2012 | X                               | X            | X                            | X                        | X                                        | X                        | X                                 | X                                         | X                              |                                             |                                       |
| U.S. Preventive Services Task Force Screening for and Management of Obesity in Adults: Recommendation Statement <sup>230</sup>                                                                                               | USA         | 2012 | X                               | X            | X                            | X                        | X                                        | X                        | X                                 |                                           | X                              | X                                           |                                       |
| Screening for and management of obesity in adults: U.S. Preventive Services Task Force recommendation statement. <sup>231</sup>                                                                                              | USA         | 2012 | X                               |              | X                            | X                        |                                          |                          |                                   |                                           | X                              | X                                           |                                       |
| RACGP Guidelines for preventive activities in general practice 8th edition; 7.2 Overweight <sup>232</sup>                                                                                                                    | Australia   | 2012 | X                               | X            | X                            | X                        | X                                        | X                        | X                                 |                                           | X                              |                                             |                                       |
| National guide to a preventive health assessment for Aboriginal and Torres Strait Islander people<br>Second edition; Overweight/Obesity <sup>233</sup>                                                                       | Australia   | 2012 | X                               | X            | X                            |                          |                                          |                          |                                   |                                           |                                |                                             | X                                     |
| British Columbia Ministry of Health Services                                                                                                                                                                                 | Canada      | 2011 | X                               |              | X                            |                          |                                          |                          |                                   |                                           |                                |                                             | X                                     |

|    |                                                 |            |      |   |   |   |   |   |   |   |  |   |   |
|----|-------------------------------------------------|------------|------|---|---|---|---|---|---|---|--|---|---|
| 1  |                                                 |            |      |   |   |   |   |   |   |   |  |   |   |
| 2  | Primary care providers have an important        |            |      |   |   |   |   |   |   |   |  |   |   |
| 3  | role in preventing and managing obesity         |            |      |   |   |   |   |   |   |   |  |   |   |
| 4  | through                                         |            |      |   |   |   |   |   |   |   |  |   |   |
| 5  | services offered to patients <sup>234</sup>     |            |      |   |   |   |   |   |   |   |  |   |   |
| 6  | World Gastroenterological Organisation:         | Internatio | 2011 | X |   | X |   |   |   |   |  |   | X |
| 7  | Obesity Guideline <sup>235</sup>                | nal        |      |   |   |   |   |   |   |   |  |   |   |
| 8  | Scottish Intercollegiate Guidelines Network –   | Scotland   | 2010 | X |   | X |   |   |   |   |  |   | X |
| 9  | Management of Obesity <sup>236</sup>            |            |      |   |   |   |   |   |   |   |  |   |   |
| 10 | Dutch College of General Practitioners: Obesity | Netherlan  | 2010 | X | X | X | X | X | X | X |  | X |   |
| 11 | Guideline <sup>237</sup>                        | ds         |      |   |   |   |   |   |   |   |  |   |   |
| 12 | WHO – Interventions on Diet and Physical        | WHO        | 2009 | X |   | X |   |   |   |   |  |   | X |
| 13 | Activity: What works <sup>238</sup>             |            |      |   |   |   |   |   |   |   |  |   |   |

For peer review only



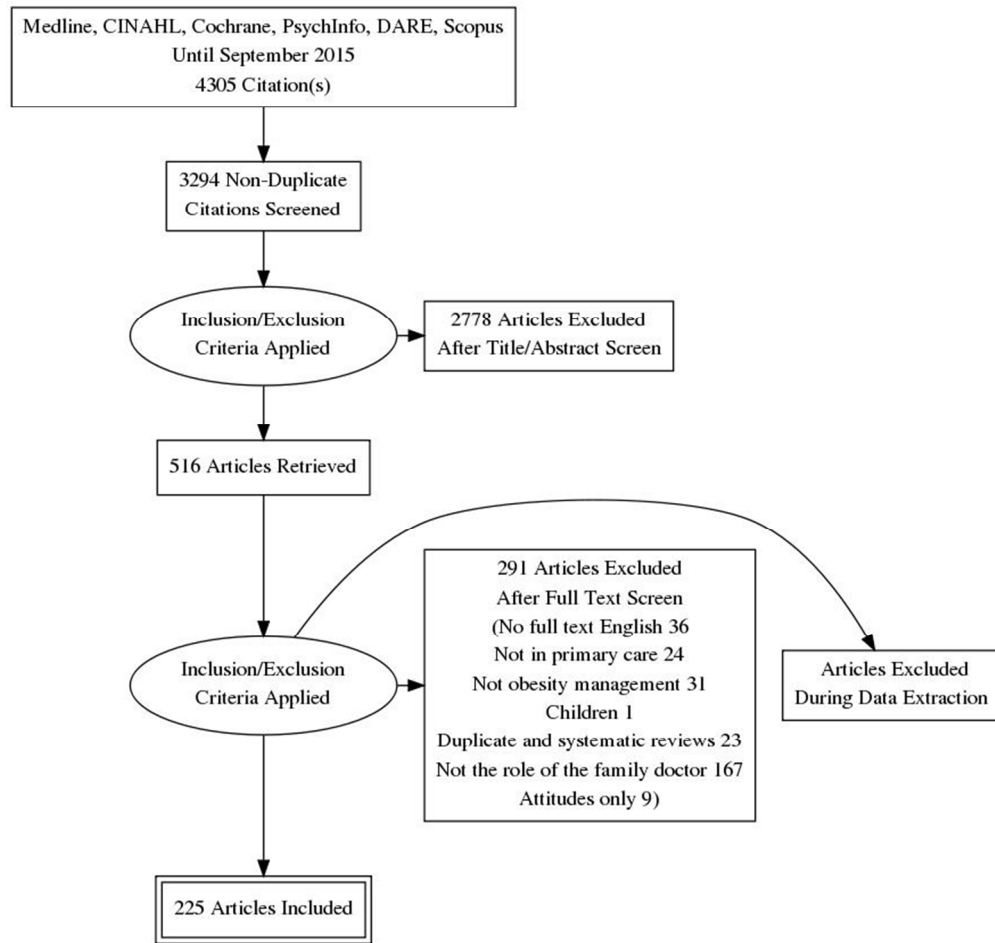

37  
38  
39  
40  
41  
42  
43  
44  
45  
46  
47  
48  
49  
50  
51  
52  
53  
54  
55  
56  
57  
58  
59  
60

Figure 1 - PRISMA flow diagram for scoping review of the role of family doctors in obesity management

310x294mm (72 x 72 DPI)

# BMJ Open

## The role of the family doctor in the management of adults with obesity: a scoping review

|                                 |                                                                                                                                                                                                                                                                                                                                                                                                                                                                                                                                                                                                                                                 |
|---------------------------------|-------------------------------------------------------------------------------------------------------------------------------------------------------------------------------------------------------------------------------------------------------------------------------------------------------------------------------------------------------------------------------------------------------------------------------------------------------------------------------------------------------------------------------------------------------------------------------------------------------------------------------------------------|
| Journal:                        | <i>BMJ Open</i>                                                                                                                                                                                                                                                                                                                                                                                                                                                                                                                                                                                                                                 |
| Manuscript ID                   | bmjopen-2017-019367.R1                                                                                                                                                                                                                                                                                                                                                                                                                                                                                                                                                                                                                          |
| Article Type:                   | Research                                                                                                                                                                                                                                                                                                                                                                                                                                                                                                                                                                                                                                        |
| Date Submitted by the Author:   | 13-Nov-2017                                                                                                                                                                                                                                                                                                                                                                                                                                                                                                                                                                                                                                     |
| Complete List of Authors:       | Sturgiss, Elizabeth; Australian Nation University Medical School, Academic Unit of General Practice<br>Elmitt, Nicholas; Australian Nation University Medical School, Academic Unit of General Practice<br>Haelser, E; Curtin University, School of Nursing, Midwifery and Paramedicine; Australian National University, Academic Unit of General Practice<br>van Weel, Chris; Radboud university medical center, Department of Primary and Community Care; Australian National University, Department of Health Services Research and Policy<br>Douglas, Kirsty; Australian National University, Australian National University Medical School |
| <b>Primary Subject Heading</b>: | General practice / Family practice                                                                                                                                                                                                                                                                                                                                                                                                                                                                                                                                                                                                              |
| Secondary Subject Heading:      | Health services research, Nutrition and metabolism, Evidence based practice                                                                                                                                                                                                                                                                                                                                                                                                                                                                                                                                                                     |
| Keywords:                       | Protocols & guidelines < HEALTH SERVICES ADMINISTRATION & MANAGEMENT, PREVENTIVE MEDICINE, PRIMARY CARE                                                                                                                                                                                                                                                                                                                                                                                                                                                                                                                                         |
|                                 |                                                                                                                                                                                                                                                                                                                                                                                                                                                                                                                                                                                                                                                 |

SCHOLARONE™  
Manuscripts

1  
2  
3 Title

4 **The role of the family doctor in the management of adults with obesity: a scoping review**  
5  
6  
7

8  
9 **Corresponding Author**

10 \*Elizabeth Ann Sturgiss  
11 Academic Unit of General Practice  
12 Australian National University Medical School  
13 PO Box 11  
14 Woden, 2606, ACT, AUSTRALIA  
15 [Elizabeth.sturgiss@anu.edu.au](mailto:Elizabeth.sturgiss@anu.edu.au)  
16 +61 412 233 119  
17  
18  
19

20 **Authors**

21 Elizabeth Sturgiss\*

22  
23 Nicholas Elmitt; Academic Unit of General Practice, The Australian National University, Canberra,  
24 Australia

25  
26 Emily Haesler; School of Nursing, Midwifery and Paramedicine, Curtin University, Perth, Australia;  
27 School of Nursing and Midwifery, La Trobe University, Melbourne, Australia;  
28 Academic Unit of General Practice, The Australian National University, Canberra, Australia  
29

30  
31 Chris van Weel; Department of Primary and Community Care, Radboud University Medical Center,  
32 Nijmegen, The Netherlands; Academic Unit of General Practice, The Australian National University,  
33 Canberra, Australia  
34

35 Kirsty Douglas; Academic Unit of General Practice, The Australian National University, Canberra,  
36 Australia  
37  
38

39 **Word Count** 3563  
40  
41  
42  
43  
44  
45  
46  
47  
48  
49  
50  
51  
52  
53  
54  
55  
56  
57  
58  
59  
60

## ABSTRACT

### Objectives

Obesity management is an important issue for the international primary care community. This scoping review examines the literature describing the role of the family doctor in managing adults with obesity. The methods were prospectively published and followed Joanna Briggs Institute methodology.

### Setting

Primary care. Adult patients.

### Included papers

Peer-reviewed and grey literature with the key words obesity, primary care, and family doctors. All literature published up to September 2015. 3294 non-duplicate papers were identified and 225 articles included after full text review.

### Primary and secondary outcome measures

Data were extracted on the family doctors' involvement in different aspects of management, and whether whole person and person-centred care were explicitly mentioned.

### Results

110 papers described interventions in primary care and family doctors were always involved in diagnosing obesity and often in recruitment of participants. A clear description of the provider involved in an intervention was often lacking. It was difficult to determine if interventions took account of whole person and person-centredness. Most opinion papers and clinical overviews described an extensive role for the family doctor in management, in contrast research on current practices depicted obesity as under-managed by family doctors. International guidelines varied in their description of the role of the family doctor with a more extensive role suggested by guidelines from family medicine organisations.

### Conclusions

There is a disconnect between how family doctors are involved in primary care interventions, the message in clinical overviews and opinion papers, and observed current practice of family doctors. The role of family doctors in international guidelines for obesity may reflect the strength of primary care in the originating health system. Reporting of primary care interventions could be improved by

1  
2  
3 enhanced descriptions of the providers involved and explanation of how the pillars of primary care  
4 are used in intervention development.  
5

### 6 7 **Strengths and limitations of this study**

- 9 • The protocol for this scoping review was prospectively published and was based on the  
10 Joanna Briggs Institute (JBI) scoping review methodology.
- 11 • All types of articles have been included in this scoping review including international  
12 guidelines from relevant family medicine colleges.
- 13 • Feedback was obtained from three groups of interested clinical and academic colleagues in  
14 Australia and internationally as per the JBI methodology for a scoping review.
- 15 • Articles in languages other than English were excluded from the review and therefore the  
16 results are not representative of non-English speaking countries.  
17  
18  
19  
20  
21

### 22 23 **Funding statement**

24 This research received no specific grant from any funding agency in the public, commercial or not-  
25 for-profit sectors.  
26

### 27 28 **Competing interests statement**

29 The authors have no competing interests to declare.  
30  
31  
32  
33  
34  
35  
36  
37  
38  
39  
40  
41  
42  
43  
44  
45  
46  
47  
48  
49  
50  
51  
52  
53  
54  
55  
56  
57  
58  
59  
60

## INTRODUCTION

Obesity is recognised as a risk factor for the development of chronic disease and is often co-morbid with diseases such as diabetes, osteoarthritis, cardiovascular disease, and depression.<sup>1</sup> As such, obesity is a condition that is commonly associated with a larger set of health issues encountered by an individual. As in all cases of multi-morbidity, a person's care will benefit from the co-ordinated and continuous care offered by an interdisciplinary team in primary care.<sup>2,3</sup> By exploring the role of the family doctor, we are not questioning the importance of team-based care. Instead, we aim to explore how family doctors are represented in the broad literature to further understand the profession's role. This understanding is important when interdisciplinary teams are not accessible (e.g. rural location), affordable (e.g. health insurance differentials), or part of the patient's preference for care.<sup>4-6</sup> Thus the literature that focuses on the management of adults with obesity by the family doctor is important to understand.

With the rising numbers of adults living with obesity and related chronic diseases, there is an increasing demand from health systems for primary care, and family doctors in particular, to identify and manage this as a chronic condition.<sup>6</sup> With this changing landscape, it was anticipated that the academic literature would explore the effectiveness of primary care, as well as the involvement of different practitioners in obesity management. However, our initial explorations into this literature found a lack of clarity in this area. A scoping review was chosen to explore emerging patterns, and gaps, in the literature base on the role of the family doctor in managing adults with obesity.

The term used to describe a family doctor varies internationally, and includes general practitioner and family physician. The term "primary care physician", which stems from the USA, includes paediatricians, obstetricians, and internists. In this review, we define "family doctor" as meaning a physician with specialist training in primary care who practices in the community, as an expert generalist.

Different practitioners will bring varying strengths and limitations to any intervention and it is important for family doctors to understand what skills they offer in the setting of obesity management. The importance of understanding provider role is demonstrated in the methodology of critical realism where realist evaluation acknowledges the importance of context of any intervention.<sup>7</sup> Translating rigorous scientific trials into policy and practice is challenging and realist evaluation is an increasingly utilised tool to inform effective translation of evidence.<sup>8</sup> Part of understanding context in the realist evaluation is knowing the type of provider, and their experience level, in delivering an intervention. This scoping review provides an overview of the role of the family doctor in interventions, clinical overviews and opinions, observed practice, and clinical guidelines.

1  
2  
3 The pillars of primary care—being the first point of health system entry, delivering continuous,  
4 whole person (i.e. concerned with every body system and the mind), and person-centred care (i.e.  
5 elucidates co-morbidities, social circumstances, and maintains the beliefs and values of the person at  
6 the heart of management for all health problems in all patients in all stages)—are well established.<sup>9</sup>  
7  
8 Other tiers of the health system may provide some, but not all, of the four pillars. Each of these  
9 concepts needs to be present in the management of a patient to gain the full benefits of primary  
10 care.<sup>10</sup> Patient management that is not based around these four pillars is unlikely to reap the  
11 benefits of co-ordinated, comprehensive, expert generalist care.<sup>11-13</sup>  
12  
13

14  
15  
16 This scoping review aims to examine and map the current research base, and broader literature, for  
17 the role of the family doctor in managing adults with obesity.  
18

19  
20 The objectives, inclusion criteria and methods of analysis for this review were specified in advance  
21 and documented in a protocol.<sup>14</sup> The scoping review questions we aimed to answer were:  
22  
23

- 24 1. What supporting evidence (both primary and secondary) do we have for the role family doctors play  
25 in obesity management for adults in primary care?  
26
- 27 2. What is the role of the family doctor in managing obesity as a primary risk as supported by the  
28 evidence base?  
29
- 30 3. What do primary care guidelines say about the role of the family doctor? What do peak bodies (i.e.  
31 advocacy group) say about the role of the family doctor? Are these both in line with what is  
32 conveyed by current research?  
33  
34  
35  
36  
37  
38

## 39 **METHODS**

40  
41 The complete methods were prospectively published in a protocol.<sup>14</sup> Our search strategy included all  
42 literature published up until September 2015. A preliminary search for existing scoping reviews did  
43 not find any with the same concept and topic (databases searched JBISIRIR, Cochrane Database of  
44 Systematic Reviews, CINAHL, PubMed, EPPI). Manuscripts were included when they involved adults  
45 (18 years +) with a Body Mass Index (BMI) of greater than 25 (overweight or obesity), any  
46 involvement of a primary care doctor/physician, a primary care setting, and inclusion of obesity  
47 management (Supplementary file). Contrary to our outlined protocol we excluded papers in  
48 languages other than English, including those with an English abstract, as we could not perform data  
49 extraction adequately on these papers. In addition to this search strategy, we specifically sought  
50 relevant clinical guidelines from countries with strong involvement in the World Organization of  
51  
52  
53  
54  
55  
56  
57  
58  
59  
60

1  
2  
3 National Colleges, Academies and Academic Associations of General Practitioners/Family Physicians  
4 (Australia, UK, USA, New Zealand, The Netherlands, Denmark, Finland, Estonia, Slovenia, Belgium,  
5 Spain, and Portugal). We explored the family medicine college websites from these countries and  
6 contacted the colleges via email when guidelines were not accessible.  
7  
8

9  
10 This scoping review was purposefully restricted to obesity management of adults in primary care. As  
11 suggested in the JBI methodology, scope has to take account of feasibility whilst maintaining a broad  
12 and comprehensive approach. By restricting the scoping review to obesity, we were able to extract  
13 more detail about the family doctor's role than if we had included articles with a main focus on a  
14 specific non-communicable disease (e.g. diabetes, heart disease). For this same reason we did not  
15 include articles that were only describing nutrition care or physical activity advice unless they were  
16 specifically in relation to care of a patient with obesity. Due to the differences in the management of  
17 obesity in children and adolescents these population groups were not included in this review.  
18  
19

20  
21 Two reviewers (LS, NE) independently reviewed the abstracts, followed by the full papers, as  
22 described in the flow chart (Figure 1). Our data extraction tool captured the author, country of  
23 intervention, year of publication, aim, term used to describe the primary care practitioner,  
24 methodology, type of involvement of the primary care doctor, skills needed by the doctor, and  
25 whether the pillars of primary care were identified. Whole person care was judged as included if the  
26 paper described obesity management provided in the context of other health needs. Person-  
27 centredness was considered as incorporated when the patient's values, beliefs, cultural needs, or  
28 context of their community were discussed. First point of contact with the health system was part of  
29 all the interventions as "primary care" was part of the search term. Elements of continuity of care  
30 were captured with data extracted about communication between any other types of providers and  
31 the family doctor. We did not complete a thematic analysis of the included papers.  
32  
33

34  
35 We iteratively developed the data extraction tool based on the information we found in a first pass  
36 of all of the intervention papers. The role of the family doctor was extracted in line with clinical  
37 management processes in a primary care setting starting with anthropometric measurements,  
38 diagnosis, referrals, nutrition care, physical activity advice, as well as more intensive treatments such  
39 as medications and bariatric surgery. For the interventions articles, data specific to clinical trials  
40 were extracted such as recruitment and control or intervention involvement. A third reviewer (EH)  
41 reviewed the extraction data sheets and recommended additional details to be added and reviewed  
42 the guideline extraction in full.  
43  
44  
45  
46  
47  
48  
49  
50  
51  
52  
53  
54  
55  
56  
57  
58  
59  
60



1  
2  
3 Our scoping review of interventions involving family doctors in the management of obesity drew on  
4 the TIDieR guidelines for the description of interventions.<sup>15</sup> These guidelines outline the parts of  
5 interventions that need to be described in order for other practitioners to replicate the intervention,  
6 either for research or clinical practice. TIDieR was developed to standardise intervention description  
7 and support their implementation, which has been an undervalued aspect of health research.<sup>15</sup>  
8  
9

10  
11 Results were presented to stakeholders including patients, clinicians, primary health network  
12 representatives, chronic disease organisations, and academics at three sessions (April 2015  
13 preliminary results presented during a seminar in Canberra; March 2016 results presented to  
14 international academic audience in the Netherlands; June 2017 results presented at an academic  
15 meeting of clinicians and academics). The input from these meetings was used to debate the  
16 justification for the review, the interpretation of the data extraction, and the synthesis of the  
17 findings.  
18  
19  
20  
21  
22

## 23 RESULTS

24  
25 This scoping review uncovered 3294 non-duplicate citations and after title and abstract screening  
26 516 articles were reviewed in full. 291 articles were excluded on full review for the reasons shown in  
27 the PRISMA diagram (Figure 1). 225 articles were included in the final review. The inter-rater  
28 agreement for the data extraction points exceeded 95% (62 points of disagreement out of 4992 data  
29 extraction points).  
30  
31  
32  
33

34 Using the focus of the three scoping questions, the following is a description of the literature that  
35 was reviewed.  
36  
37

### 38 1. What supporting evidence (both primary and secondary) do we have for role family 39 doctors play in obesity management for adults in primary care? 40

41 Of the 225 articles that were included in the review, 110 were about interventions in primary care.  
42 There were 77 different interventions described in these papers as some intervention were  
43 portrayed in multiple papers (Table 1 and 2). 57% (44/77) of the interventions were carried out in  
44 the USA, with the remainder taking place in a variety of countries (Table 1). 48% (37/77) of the  
45 interventions described were randomised controlled trials (RCTs) (Table 1). A majority of  
46 interventions on the management of adults with obesity stems from the USA, and RCTs are a  
47 common study design.  
48  
49  
50  
51  
52  
53

54 There were a total of 74 articles that were clinical overviews and opinion papers on the primary care  
55 management of obesity that included discussion of the role of the family doctor (Table 3), and 25  
56  
57  
58  
59  
60

1  
2  
3 papers that described current practice of family doctors in obesity management, usually through  
4 surveys or clinical audits (Table 4). There were 16 international guidelines relevant to family doctors  
5 focused on the management of obesity (Table 5).  
6  
7

## 8 **2. What is the role of the family doctor in managing obesity as a primary risk as supported by** 9 **the evidence base?** 10

11 The family doctor was involved in varying ways in obesity management depending on the type of  
12 article. The most common role for the family doctor across all types of articles was the diagnosis of  
13 obesity. The diagnosis was based on the BMI of the patient and waist circumference measurements  
14 were rarely taken. Family doctors were not often involved in intervention studies beyond diagnosis  
15 and referral into the trial. Papers about current practice, including audits and surveys, mentioned a  
16 lack of recognition and treatment of obesity by family doctors. Current overview and opinion papers  
17 often suggested a wide role including diagnosis, nutrition and physical activity counselling, and  
18 options for appropriate referrals. And there was great variation in the international guidelines with  
19 the family doctor not mentioned by some, to a broad role in others. Unsurprisingly this varied  
20 depending on whether a primary care organization had developed the guideline.  
21  
22  
23  
24  
25  
26  
27  
28  
29

30 In all types of articles, the family doctor was frequently involved in the diagnosis of obesity (73/110  
31 intervention papers, 69/74 overview papers, 22/24 current practice papers). They were involved in  
32 height and weight measurements in 111 out 225 total papers, and overall waist circumference was  
33 infrequently mentioned in all articles (50/209 papers, not including guidelines).  
34  
35  
36

37 We included all interventions relevant to the review, whether they were reported the family  
38 doctor's role as part of an experimental intervention or in a control arm (Table 2). In 45 of the 77  
39 interventions the family doctor was involved in recruiting patients to the trial. The family doctor only  
40 had a role in care-delivery in 27 interventions (35%) in either the intervention or control arm of a  
41 trial. Across all interventions, "standard care" was used in 27 trials, however it was only well-  
42 described in 12 of these. In one case, the "primary care provider" was used in the standard care arm  
43 but was "instructed not to provide specific behavioral strategies for changing eating and activity  
44 habits".<sup>16</sup>  
45  
46  
47  
48  
49

50 We attempted to describe whether the pillars of primary care could be identified in the  
51 interventions as they were described. In 17 of the 77 interventions the comprehensive, holistic care  
52 of the patient was described. In only seven of the interventions could person-centredness be seen in  
53 the description of the intervention.  
54  
55  
56  
57  
58  
59  
60

1  
2  
3 Overview and opinion articles generally reported that the family doctor should be involved in all  
4 stages of management from diagnosis, nutrition and physical activity counseling, and ongoing follow  
5 up. Not surprisingly, papers that were mainly about pharmacological interventions or bariatric  
6 surgery were only about that area of management. Bariatric surgery papers described the family  
7 doctor as required for referral, but not work up, and some described the family doctor's role in  
8 ongoing management after surgery.  
9  
10

11  
12  
13 Overall the family doctor was commonly involved in the diagnosis of obesity, and as a referral source  
14 into intervention trials. Frequently the under-recognition and management of obesity was noted in  
15 observational studies of current practice. It was difficult to identify the pillars of primary care  
16 practice in the description on interventions for adult obesity management.  
17  
18  
19  
20  
21

22 **3. What do primary care guidelines say about the role of the family doctor? What do peak**  
23 **bodies (i.e. advocacy groups) say about the role of the family doctor? Are these both in**  
24 **line with what is conveyed by current research?**  
25

26 In terms of the specific role of the family doctor, guidelines were variable and ranged from no  
27 mention of the family doctor, to the family doctor being involved in every stage of management  
28 from diagnosis and advice on nutrition and physical activity, through to intensive treatments and  
29 long term follow up. Not surprisingly guidelines written by family medicine organisations described a  
30 greater role for the family doctor. For guidelines that were written with a national healthcare focus,  
31 there was less detail on the type of professional that should be involved in each of the management  
32 areas.  
33  
34  
35  
36  
37

38 Seven of the 16 guidelines specifically mentioned family doctors (or synonym), with one referring to  
39 "primary care providers" (Table 5). Seven (44%) suggested the family doctor should be involved in  
40 anthropometric measures of the patient, five (31%) recommended the family doctor should provide  
41 nutrition and physical activity advice, and seven discussed the referral to allied health providers by  
42 the family doctor.  
43  
44  
45  
46  
47  
48

49 **DISCUSSION**  
50

51 This scoping review synthesises the current literature on the role of the family doctor in the  
52 management of obesity in primary care. This comprehensive set of articles provides the research  
53 community with a resource for further study, for example systematic reviews and meta-analyses  
54 based on different aspects of primary care management of adult obesity.  
55  
56  
57  
58  
59  
60

1  
2  
3 The family doctor is mostly used as a recruitment source in primary care interventions, the majority  
4 of which have been carried out in the USA. This is in contrast to guidelines, clinical overviews and  
5 opinions that suggest a role for family doctors from diagnosis, offering lifestyle advice and  
6 behavioural support, and ongoing follow up. Half of the articles that described current practice,  
7 mostly through clinical audits or surveys, reported that obesity was under-recognised by family  
8 doctors. There appears to be a misalignment between what commentators suggest as a role for the  
9 family doctor, and the current role they play in many primary care interventions.  
10  
11  
12  
13

14 The great majority of primary care interventions for adult obesity are being developed and tested in  
15 the USA healthcare setting. This has implications for the interpretation of the findings for translation  
16 into other contexts.<sup>17</sup> For example, the USA does not have a “gatekeeper” function for family  
17 doctors and patients are able to self-refer to tertiary services.<sup>18</sup> Patients with health insurance also  
18 have different access to care compared to those that do not.<sup>18</sup> This may have ramification when  
19 translating an intervention to a context with universal healthcare access, such as the UK and  
20 Australia, and warrants further investigation.  
21  
22  
23  
24  
25

26 We were also able to identify areas of concern for the publication of primary care research in obesity  
27 management. Twenty-seven of the interventions used standard care in the control arm, but  
28 standard care was poorly defined in 15 of these interventions. It is difficult to determine the relative  
29 effectiveness of new interventions in the management of obesity in primary care when they are  
30 compared to poorly defined standard care. More worryingly, was the use of sub-standard care  
31 where family doctors were advised not to give lifestyle advice to patients.<sup>16</sup> This suggest that usual  
32 care was artificially reduced in order to improve the apparent effectiveness of an intervention. This  
33 is a dubious practice from an ethical and scientific perspective and undermines the role of family  
34 doctors in obesity management.  
35  
36  
37  
38  
39  
40

#### 41 Implications for Practice

42 Guidelines are documents that are developed to assist practitioners in deciding on a course of action  
43 in a specific clinical circumstance<sup>19</sup> and they often determine a standard of care. The obesity  
44 guidelines that were identified in this review had varying recommendations for the role of the family  
45 doctor. In some jurisdictions, including Australia, national guidelines do not often recommend that a  
46 specific profession must be responsible for a task, unless the task is limited to the scope of one  
47 profession alone. In contrast, in the Netherlands where the central role of family doctors is  
48 prescribed within the health system, family doctors are likely to have a foundational role in all  
49 guidelines that are produced. The role of guidelines and their development varies between nations  
50 and health systems and the centrality of the role of the family doctor in a guideline may reflect the  
51  
52  
53  
54  
55  
56  
57  
58  
59  
60

1  
2  
3 strength of primary care in the specific healthcare system. Therefore, guidelines may not always be  
4 the definitive source for determining the clinical scope and responsibilities of specific professional  
5 groups such as family doctors in obesity care.  
6  
7

### 8 Implications for Research

9  
10 Poor descriptions of interventions could have been aided by adherence to the TIDieR guidelines.<sup>15</sup>  
11 Specifically, the TIDieR guidelines suggest the health professionals involved in an intervention should  
12 be described in terms of their professional background, their expertise, and any specific training  
13 given. The terms used to describe a family doctor were diverse in the intervention papers and  
14 ranged from primary care physician, primary care provider, family physician, or general practitioner.  
15 The range of terms that are used in the primary care literature makes it impossible to understand  
16 the qualifications of professionals involved in the interventions. Trials from the USA often use  
17 “primary care providers” or “primary care practitioners”, nebulous terms that could include a variety  
18 of professionals with vastly different training. This is particularly problematic when international  
19 primary care teams attempt to translate interventions to their local context. An international  
20 taxonomy for describing family doctors could assist in solving this issue.  
21  
22  
23  
24  
25  
26

27  
28 The primary care literature has thoroughly described the fundamental factors that make primary  
29 care effective.<sup>9</sup> However, it was challenging for reviewers to determine if interventions were  
30 inclusive of the principles of person-centredness and whole person care. Knowing that first point of  
31 contact, whole person, co-ordinated, person-centred, continuous care, is important in primary care;  
32 it would be helpful for primary care interventions to explicitly consider these factors in their design.  
33 Additionally, the specific reporting of these factors in primary care trials would be helpful in  
34 publications to improve the understanding of how and why primary care interventions work. It is  
35 perhaps important that primary care determines a specific set of reporting requirements for primary  
36 care research that could be added to the TIDieR checklist.  
37  
38  
39  
40  
41  
42

### 43 Limitations

44 This scoping review is limited to the context of obesity management in primary care. Articles that  
45 reported on other important and related topics like nutrition, lifestyle change, or cardiovascular  
46 health, were not included. We chose to limit the review to obesity as we were interested in this  
47 specific literature and wanted to maintain the depth of our data extraction whilst maintaining  
48 feasibility. The review was also limited to publications in the English language and this may have  
49 missed work that included family doctors in non-English speaking healthcare settings. We may have  
50 missed international guidelines that were not picked up in our search strategy. As expected in a  
51 scoping review, articles were not assessed for quality or the specific outcomes of reported trials.  
52  
53  
54  
55  
56  
57  
58  
59  
60

1  
2  
3 Further work would have to be done from the identified literature and this could include a thematic  
4 analysis. The aim of the scoping review is to widely and broadly search the literature to identify gaps  
5 and inconsistencies, and provide a platform for further systematic work.<sup>20</sup>  
6  
7

## 8 **CONCLUSION**

9 There appears to be a disconnect between how family doctors are involved in primary care  
10 interventions, the message that is found in academic literature, and the apparent role of the family  
11 doctor in current practice. Guidelines that are developed by national bodies are not necessarily the  
12 definitive source of information for the discrete role of specific health professionals. Improvement is  
13 required in the reporting of primary care interventions, particularly in the professional background  
14 of those involved in the trial and the acknowledgment of the pillars of primary care in intervention  
15 development. This foundation work provides a platform for further interpretation of existing  
16 literature on the role of the family doctor in obesity management.  
17  
18  
19  
20  
21  
22  
23  
24

## 25 **Author contributions**

26 ES, NE, EH, CvW, KD were part of the development and publication of the protocol. ES and NE were  
27 involved in the search and data extraction. EH was the third author to check the data extraction tool.  
28 ES and NE did the initial analysis and synthesis. ES and NE presented the findings of the scoping  
29 review at the stakeholder sessions. ES wrote the first draft of the manuscript. ES, NE, EH, CvW, KD  
30 then contributed to the writing of the manuscript and approved the final version.  
31  
32  
33  
34

## 35 **Acknowledgements**

36 Dr Ginny Sargent is thanked for her assistance in developing the protocol, feedback on the final  
37 analysis, and review of the manuscript.  
38  
39  
40  
41  
42

## 43 **Data sharing statement**

44 Further data about the studies that were excluded from the scoping review is available by request  
45 from the authors. All data regarding included studies is included in this paper and no additional data  
46 on these studies are available.  
47  
48  
49  
50  
51  
52

53 **Figure 1** - PRISMA flow diagram for scoping review of the role of family doctors in obesity  
54 management  
55  
56  
57  
58  
59  
60

## REFERENCES

1. Clinical practice guidelines for the management of overweight and obesity in adults, adolescents and children in Australia. In: National Health and Medical Research Council, ed. Melbourne: National Health and Medical Research Council, 2013.
2. Barnett K, Mercer SW, Norbury M, et al. Epidemiology of multimorbidity and implications for health care, research, and medical education: a cross-sectional study. *The Lancet* 2012;**380**(9836):37-43 doi: [https://doi.org/10.1016/S0140-6736\(12\)60240-2](https://doi.org/10.1016/S0140-6736(12)60240-2).
3. Bayliss EA. Simplifying Care for Complex Patients. *Annals of Family Medicine* 2012;**10**(1):3-5 doi: 10.1370/afm.1352.
4. Tan D, Zwar NA, Dennis SM, et al. Weight management in general practice: what do patients want? *The Medical journal of Australia* 2006;**185**(2):73-5
5. Sturgiss EA, van Weel C, Ball L, et al. Obesity management in Australian primary care: where has the general practitioner gone? *Australian journal of primary health* 2016 doi: 10.1071/py16074.
6. Jansen S, Desbrow B, Ball L. Obesity management by general practitioners: the unavoidable necessity. *Australian journal of primary health* 2015;**21**(4):366-8 doi: 10.1071/py15018.
7. Clark AM, Briffa TG, Thirsk L, et al. What football teaches us about researching complex health interventions. *BMJ : British Medical Journal* 2012;**345** doi: 10.1136/bmj.e8316.
8. Wong G, Westhorp G, Manzano A, et al. RAMESES II reporting standards for realist evaluations. *BMC Medicine* 2016;**14**:96 doi: 10.1186/s12916-016-0643-1.
9. Stange KC. Barbara Starfield: Passage of the Pathfinder of Primary Care. *Annals of Family Medicine* 2011;**9**(4):292-96 doi: 10.1370/afm.1293.
10. Chapter 1: Meeting people's health needs. In: Kidd M, ed. *The contribution of family medicine to improving health systems: a guidebook from the World Organization of Family Doctors*. 2nd ed. London: Radcliffe Publishing, 2013:1-13.
11. Stange KC. A science of connectedness. *Ann Fam Med* 2009;**7**(5):387-95 doi: 10.1370/afm.990.
12. Stange K. The paradox of the parts and the whole in understanding and improving general practice. *International Journal for Quality in Health Care* 2002;**14**(4):267-8
13. Gray DP, Evans P, Sweeney K, et al. Towards a theory of continuity of care. *Journal of the Royal Society of Medicine* 2003;**96**:160-66
14. Sturgiss EA, Elmitt N, van Weel C, et al. The role of the family doctor in the management of adults who are obese: a scoping review protocol. *SpringerPlus* 2015;**4**:820 doi: 10.1186/s40064-015-1647-6.
15. Hoffmann TC, Glasziou PP, Boutron I, et al. Better reporting of interventions: template for intervention description and replication (TIDieR) checklist and guide. *BMJ* 2014;**348** doi: 10.1136/bmj.g1687.
16. Wadden TA, Volger S, Sarwer DB, et al. A two- year randomized trial of obesity treatment in primary care practice. *The New England Journal of Medicine* 2011;**365**(21):1969-79
17. Pfadenhauer LM, Gerhardus A, Mozygemba K, et al. Making sense of complexity in context and implementation: the Context and Implementation of Complex Interventions (CICI) framework. *Implementation Science* 2017;**12**(1):21 doi: 10.1186/s13012-017-0552-5.
18. Shi L. The Impact of Primary Care: A Focused Review. *Scientifica* 2012;**2012**:22 doi: 10.6064/2012/432892.
19. Woolf S, Schünemann HJ, Eccles MP, et al. Developing clinical practice guidelines: types of evidence and outcomes; values and economics, synthesis, grading, and presentation and deriving recommendations. *Implementation Science* 2012;**7**(1):61 doi: 10.1186/1748-5908-7-61.
20. The Joanna Briggs Institute. *The Joanna Briggs Institute Reviewers' Manual 2015 Methodology for JBI Scoping Reviews*. Adelaide, Australia: Joanna Briggs Institute,, 2015.
21. Ashley JM, St Jeor ST, Perumean-Chaney S, et al. Meal replacements in weight intervention. *Obesity research* 2001;**9 Suppl 4**:312s-20s doi: 10.1038/oby.2001.136.



22. Ashley JM, St Jeor ST, Schrage JP, et al. Weight control in the physician's office. *Archives of internal medicine* 2001;**161**(13):1599-604
23. A new evidence-based model for weight management in primary care: The Counterweight Programme. *Journal of Human Nutrition and Dietetics* 2004;**17**(3):191-208
24. The implementation of the Counterweight Programme in Scotland, UK. *Family Practice* 2012;**29**(Suppl 1):I139-I44 doi: 10.1093/fampra/cmr074.
25. Laws R. Current approaches to obesity management in UK Primary Care: the Counterweight Programme. *J Hum Nutr Diet* 2004;**17** doi: 10.1111/j.1365-277X.2004.00528.x.
26. Laws R. A new evidence-based model for weight management in primary care: the Counterweight Programme. *Hum Nutr Diet* 2004;**17** doi: 10.1111/j.1365-277X.2004.00517.x.
27. McQuigg M, Brown J, Broom J, et al. Empowering primary care to tackle the obesity epidemic: The Counterweight programme. *European Journal of Clinical Nutrition* 2005;**59**(SUPPL. 1):S93-S101 doi: 10.1038/sj.ejcn.1602180.
28. McQuigg M, Brown JE, Broom J, et al. The Counterweight programme: Prevalence of CVD risk factors by body mass index and the impact of 10% weight change. *Obesity research & clinical practice* 2008;**2**(1):I-ii doi: 10.1016/j.orcp.2008.01.002.
29. McQuigg M, Brown JE, Broom JI, et al. Engaging patients, clinicians and health funders in weight management: the Counterweight Programme. *Fam Pract* 2008;**25 Suppl 1**:i79-86 doi: 10.1093/fampra/cmn081.
30. Bolognesi M, Nigg CR, Massarini M, et al. Reducing obesity indicators through brief physical activity counseling (PACE) in Italian primary care settings. *Annals of Behavioral Medicine* 2006;**31**(2):179-85
31. Bodenlos JS. Impact of a stage-matched weight loss intervention on stage of change progression in predominantly African-American female primary care patients. *Dissertation Abstracts International: Section B: The Sciences and Engineering* 2007;**67**(12-B):7364
32. Kerr J, Patrick K, Norman G, et al. Randomized control trial of a behavioral intervention for overweight women: Impact on depressive symptoms. *Depression and Anxiety* 2008;**25**(7):555-58
33. Bennett GG, Warner ET, Glasgow RE, et al. Obesity treatment for socioeconomically disadvantaged patients in primary care practice. *Archives of internal medicine* 2012;**172**(7):565-74 doi: 10.1001/archinternmed.2012.1.
34. Ritzwoller DP, Glasgow RE, Sukhanova AY, et al. Economic analyses of the be fit be well program: A weight loss program for community health centers. *Journal of General Internal Medicine* 2013;**28**(12):1581-88 doi: 10.1007/s11606-013-2492-3.
35. Greaney ML, Quintiliani LM, Warner ET, et al. Weight management among patients at community health centers: The "Be Fit, Be Well" study. *Obesity and Weight Management* 2009;**5**(5):222-28
36. Appel LJ, Clark JM, Yeh H-C, et al. Comparative effectiveness of weight-loss interventions in clinical practice. *The New England Journal of Medicine* 2011;**365**(21):1959-68
37. Bennett WL, Gudzone KA, Appel LJ, et al. Insights from the POWER practice-based weight loss trial: a focus group study on the PCP's role in weight management. *Journal of general internal medicine* 2014;**29**(1):50-58 doi: 10.1007/s11606-013-2562-6.
38. Bennett WL, Wang N-Y, Gudzone KA, et al. Satisfaction with primary care provider involvement is associated with greater weight loss: Results from the practice-based power trial. *Patient Education and Counseling* 2015:No Pagination Specified
39. Jerome GJ, Yeh H-C, Dalcin A, et al. Treatment of Obesity in Primary Care Practice: The Practice Based Opportunities for Weight Reduction (POWER) Trial at Johns Hopkins. *Obesity and Weight Management* 2009;**October**:216-21
40. Alfaris N, Wadden TA, Sarwer DB, et al. Effects of a 2-year behavioral weight loss intervention on sleep and mood in obese individuals treated in primary care practice. *Obesity* 2015;**23**(3):558-64
41. Tsai AG, Wadden TA, Volger S, et al. Cost-effectiveness of a primary care intervention to treat obesity. *International journal of obesity (2005)* 2013;**37 Suppl 1**:S31-7 doi: 10.1038/ijo.2013.94.



- 1
  - 2
  - 3
  - 4
  - 5
  - 6
  - 7
  - 8
  - 9
  - 10
  - 11
  - 12
  - 13
  - 14
  - 15
  - 16
  - 17
  - 18
  - 19
  - 20
  - 21
  - 22
  - 23
  - 24
  - 25
  - 26
  - 27
  - 28
  - 29
  - 30
  - 31
  - 32
  - 33
  - 34
  - 35
  - 36
  - 37
  - 38
  - 39
  - 40
  - 41
  - 42
  - 43
  - 44
  - 45
  - 46
  - 47
  - 48
  - 49
  - 50
  - 51
  - 52
  - 53
  - 54
  - 55
  - 56
  - 57
  - 58
  - 59
  - 60
42. Sarwer D, Moore R, Diewald L, et al. The impact of a primary care-based weight loss intervention on the quality of life. *International Journal of Obesity* 2013;**37**(Suppl 1):S25-S30
43. Derbas J, Vetter M, Volger S, et al. Improving weight management in primary care practice: a possible role for auxiliary health professionals collaborating with primary care physicians. *Obesity and Weight Management* 2009;**5**:210-15
44. Volger S, Wadden TA, Sarwer DB, et al. Changes in eating, physical activity and related behaviors in a primary care-based weight loss intervention. *International journal of obesity (2005)* 2013;**37 Suppl 1**:S12-8 doi: 10.1038/ijo.2013.91.
45. Vetter ML, Wadden TA, Chittams J, et al. Effect of lifestyle intervention on cardiometabolic risk factors: results of the POWER-UP trial. *International journal of obesity (2005)* 2013;**37 Suppl 1**:S19-24 doi: 10.1038/ijo.2013.92.
46. Wadden TA, Volger S, Tsai AG, et al. Managing obesity in primary care practice: an overview with perspective from the POWER-UP study. *International journal of obesity (2005)* 2013;**37 Suppl 1**:S3-11 doi: 10.1038/ijo.2013.90.
47. Tsai AG, Wadden TA, Rogers MA, et al. A primary care intervention for weight loss: Results of a randomized controlled pilot study. *Obesity* 2010;**18**(8):1614-18
48. Banerjee ES, Gambler A, Fogleman C. Adding obesity to the problem list increases the rate of providers addressing obesity. *Family medicine* 2013;**45**(9):629-33
49. Blonstein AC, Yank V, Stafford RS, et al. Translating an evidence-based lifestyle intervention program into primary care: Lessons learned. *Health Promotion Practice* 2013;**14**(4):491-97
50. Barnes ER, Theeke LA, Mallow J. Impact of the provider and healthcare team Adherence to Treatment Guidelines (PHAT-G) intervention on adherence to national obesity clinical practice guidelines in a primary care centre. *Journal of Evaluation in Clinical Practice* 2015;**21**(2):300-06
51. Booth AO, Nowson CA, Huang N, et al. Evaluation of a brief pilot nutrition and exercise intervention for the prevention of weight gain in general practice patients. *Public Health Nutrition* 2006;**9**(8):1055-61 doi: 10.1017/PHN2006980.
52. Bordowitz R, Morland K, Reich D. The use of an electronic medical record to improve documentation and treatment of obesity. *Family medicine* 2007;**39**(4):274-9
53. Bowerman S, Bellman M, Saltsman P, et al. Implementation of a primary care physician network obesity management program. *Obesity research* 2001;**9 Suppl 4**:321S-25S
54. Clark D, Chrysler L, Perkins A, et al. Screening, referral, and participation in a weight management program implemented in five CHCs. *Journal of Health Care for the Poor and Underserved* 2010;**21**(2):617-28
55. Clark DO, Keith N, Chrysler L, et al. Design and reach of a primary care weight management program. *Journal of Health Care for the Poor and Underserved* 2008;**19**(1):171-79
56. Coupar AM, Kennedy T. Running a weight control group: experiences of a psychologist and a general practitioner. *Journal of the Royal College of General Practitioners* 1980;**30**(210):41-48
57. Cutler L, King B, McCarthy N, et al. Appetite for life: An evaluation of a primary care lifestyle programme. *Journal of Primary Health Care* 2010;**2**(4):281-87
58. Doering T, Harwell S, Fassler C, et al. An interventional pilot study on obesity among low-income patients using a computer-based weight management module. *Journal of community hospital internal medicine perspectives* 2013;**3**(1) doi: 10.3402/jchimp.v3i1.20072.
59. Dutton GR, Phillips JM, Kukkamalla M, et al. Pilot study evaluating the feasibility and initial outcomes of a primary care weight loss intervention with peer coaches. *The Diabetes Educator* 2015;**41**(3):361-68
60. Eichler K, Zoller M, Steurer J, et al. Cognitive-behavioural treatment for weight loss in primary care: A prospective study. *Swiss Medical Weekly* 2007;**137**(35-36):489-95
61. Ely AC, Banitt A, Befort C, et al. Kansas primary care weighs in: A pilot randomized trial of a chronic care model program for obesity in 3 rural Kansas primary care practices. *The Journal of Rural Health* 2008;**24**(2):125-32

62. Feigenbaum A, Pasternak S, Zusk E, et al. Influence of intense multidisciplinary follow-up and orlistat on weight reduction in a primary care setting. *BMC Family Practice* 2005;**6** doi: 10.1186/1471-2296-6-5.
63. Kanke S, Kawai T, Takasawa N, et al. Interventions for body weight reduction in obese patients during short consultations: An open-label randomized controlled trial in the Japanese primary care setting. *Asia Pacific Family Medicine* 2015 doi: 10.1186/s12930-015-0022-7.
64. Fuller NR, Colagiuri S, Schofield D, et al. A within-trial cost-effectiveness analysis of primary care referral to a commercial provider for weight loss treatment, relative to standard care—an international randomised controlled trial. *International Journal of Obesity* 2013;**37**(6):828-34 doi: 10.1038/ijo.2012.139.
65. Holzapfel C, Cresswell L, Ahern AL, et al. The challenge of a 2-year follow-up after intervention for weight loss in primary care. *International journal of obesity (2005)* 2014;**38**(6):806-11 doi: 10.1038/ijo.2013.180.
66. Jebb SA, Ahern AL, Olson AD, et al. Primary care referral to a commercial provider for weight loss treatment versus standard care: a randomised controlled trial. *The Lancet* 2011;**378**(9801):1485-92 doi: 10.1016/s0140-6736(11)61344-5.
67. Huerta S, Li Z, Li HC, et al. Feasibility of a partial meal replacement plan for weight loss in low-income patients. *International Journal of Obesity* 2004;**28**(12):1575-79 doi: 10.1038/sj.ijo.0802792.
68. Garies S, Irving A, Williamson T, et al. Using EMR data to evaluate a physician-developed lifestyle plan for obese patients in primary care. *Canadian Family Physician* 2015;**61**(5):e225-e31
69. Gusi N, Reyes MC, Gonzalez-Guerrero JL, et al. Cost-utility of a walking programme for moderately depressed, obese, or overweight elderly women in primary care: A randomised controlled trial. *BMC Public Health* 2008;**8** doi: 10.1186/1471-2458-8-231.
70. Haas WC, Moore JB, Kaplan M, et al. Outcomes from a medical weight loss program: Primary care clinics versus weight loss clinics. *American Journal of Medicine* 2012;**125**(6):603.e7-03.e11 doi: 10.1016/j.amjmed.2011.07.039.
71. Crawford-Faucher A. Which weight-loss programs are most effective? *American Family Physician* 2012;**86**(3):280-82
72. Jolly K, Daley A, Adab P, et al. A randomised controlled trial to compare a range of commercial or primary care led weight reduction programmes with a minimal intervention control for weight loss in obesity: The Lighten Up trial. *BMC Public Health* 2010;**10** doi: 10.1186/1471-2458-10-439.
73. Jolly K, Lewis A, Beach J, et al. Comparison of range of commercial or primary care led weight reduction programmes with minimal intervention control for weight loss in obesity: lighten Up randomised controlled trial. *BMJ* 2011;**343**:d6500 doi: 10.1136/bmj.d6500.
74. Hauner H, Meier M, Wendland G, et al. Weight reduction by sibutramine in obese subjects in primary care medicine: The S.A.T. study. *Experimental and Clinical Endocrinology and Diabetes* 2004;**112**(4):201-07 doi: 10.1055/s-2004-817934.
75. Hoke CN, Franks S. Work site, physician's office, or medical university clinic: The effect of setting on success in a multidisciplinary weight-loss program. *Eating Behaviors* 2002;**3**(1):93-100 doi: 10.1016/S1471-0153(01)00053-8.
76. Kumanyika S, Fassbender J, Phipps E, et al. Design, recruitment and start up of a primary care weight loss trial targeting African American and Hispanic adults. *Contemporary clinical trials* 2011;**32**(2):215-24 doi: 10.1016/j.cct.2010.11.002.
77. Kumanyika SK, Fassbender JE, Sarwer DB, et al. One-year results of the Think Health! study of weight management in primary care practices. *Obesity (Silver Spring, Md)* 2012;**20**(6):1249-57 doi: 10.1038/oby.2011.329.
78. Kupper-Smith NC, Miles TP. Effect of a BMI chart on weight management discussions in a primary care setting. *The Journal of the Kentucky Medical Association* 2006;**104**(11):519-22
79. Laing BY, Mangione CM, Tseng CH, et al. Effectiveness of a smartphone application for weight loss compared with usual care in overweight primary care patients: a randomized,

- controlled trial. *Annals of internal medicine* 2014;**161**(10 Suppl):S5-12 doi: 10.7326/m13-3005.
80. Lewis A, Jolly K, Adab P, et al. A brief intervention for weight management in primary care: Study protocol for a randomized controlled trial. *Trials* 2013;**14**(1) doi: 10.1186/1745-6215-14-393.
81. Logue E, Sutton K, Jarjoura D, et al. Obesity management in primary care: assessment of readiness to change among 284 family practice patients. *The Journal of the American Board of Family Practice / American Board of Family Practice* 2000;**13**(3):164-71
82. Logue E, Sutton K, Jarjoura D, et al. Transtheoretical Model-Chronic Disease Care for Obesity in Primary Care: A Randomized Trial. *Obesity research* 2005;**13**(5):917-27
83. Logue EE, Bourguet CC, Palmieri PA, et al. The better weight-better sleep study: A pilot intervention in primary care. *American Journal of Health Behavior* 2012;**36**(3):319-34
84. Lowe MR, Butryn ML, Thomas J, et al. Meal replacements, reduced energy density eating, and weight loss maintenance in primary care patients: A randomized controlled trial. *Obesity* 2014;**22**(1):94-100
85. Madigan CD, Jolly K, Lewis AL, et al. A randomised controlled trial of the effectiveness of self-weighting as a weight loss intervention. *The International Journal of Behavioral Nutrition and Physical Activity* Vol 11 Oct 2014, ArtID 125 2014;**11**
86. Davis Martin P, Rhode PC, Dutton GR, et al. A primary care weight management intervention for low-income African-American women. *Obesity (Silver Spring, Md)* 2006;**14**(8):1412-20 doi: 10.1038/oby.2006.160.
87. Martin PD, Dutton GR, Rhode PC, et al. Weight loss maintenance following a primary care intervention for low-income minority women. *Obesity (Silver Spring, Md)* 2008;**16**(11):2462-7 doi: 10.1038/oby.2008.399.
88. McDoniel SO, Wolskee P, Shen J. Treating obesity with a novel hand-held device, computer software program, and Internet technology in primary care: The SMART motivational trial. *Patient Education and Counseling* 2010;**79**(2):185-91
89. McDoniel S. The short-term effect of a technology based comprehensive weight reduction program for obese adults in a primary care medical clinic: A three month psychobehavioral study, 2008.
90. Mehring M, Haag M, Linde K, et al. Effects of a general practice guided web-based weight reduction program - Results of a cluster-randomized controlled trial. *BMC Family Practice* 2013;**14** doi: 10.1186/1471-2296-14-76.
91. Munsch S, Biedert E, Keller U. Evaluation of a lifestyle change programme for the treatment of obesity in general practice. *Swiss Med Wkly* 2003;**133**(9-10):148-54 doi: 2003/09/smw-10109.
92. O'Grady JS, Thacher TD, Chaudhry R. The effect of an automated clinical reminder on weight loss in primary care. *Journal of the American Board of Family Medicine : JABFM* 2013;**26**(6):745-50 doi: 10.3122/jabfm.2013.06.120340.
93. Olsen J, Willaing I, Ladelund S, et al. Cost-effectiveness of nutritional counseling for obese patients and patients at risk of ischemic heart disease. *International Journal of Technology Assessment in Health Care* 2005;**21**(2):194-202
94. Pellegrini CA, Hoffman SA, Collins LM, et al. Optimization of remotely delivered intensive lifestyle treatment for obesity using the Multiphase Optimization Strategy: Opt-IN study protocol. *Contemporary clinical trials* 2014;**38**(2):251-59 doi: 10.1016/j.cct.2014.05.007.
95. Richman RM, Webster P, Salgo AR, et al. A shared care approach in obesity management: the general practitioner and a hospital based service. *International journal of obesity and related metabolic disorders : journal of the International Association for the Study of Obesity* 1996;**20**(5):413-9
96. Ross R, Lam M, Blair SN, et al. Trial of prevention and reduction of obesity through active living in clinical settings: a randomized controlled trial. *Archives of internal medicine* 2012;**172**(5):414-24 doi: 10.1001/archinternmed.2011.1972.
97. Ross R, Blair SN, Godwin M, et al. Prevention and Reduction of Obesity through Active Living (PROACTIVE): rationale, design and methods. *British journal of sports medicine* 2009;**43**(1):57-63 doi: 10.1136/bjism.2008.053504.

- 1  
2  
3 98. Rutten GM, Meis JJ, Hendriks MR, et al. The contribution of lifestyle coaching of overweight  
4 patients in primary care to more autonomous motivation for physical activity and healthy  
5 dietary behaviour: Results of a longitudinal study. *The International Journal of Behavioral  
6 Nutrition and Physical Activity* Vol 11 Jul 2014, ArtID 86 2014;**11**
- 7 99. Saris WHM, Koenders MC, Pannemans DLE, et al. Outcome of a multicenter outpatient weight-  
8 management program including very-low-calorie diet and exercise. *American Journal of  
9 Clinical Nutrition* 1992;**56**(SUPPL. 1):294S-96S
- 10 100. Stephens GS, Blanken SE, Greiner KA, et al. Visual prompt poster for promoting patient-  
11 physician conversations on weight loss. *Annals of Family Medicine* 2008;**6**(SUPPL. 1):S33-  
12 S36 doi: 10.1370/afm.780.
- 13 101. Driehuis F, Barte JC, Ter Bogt NC, et al. Maintenance of lifestyle changes: 3-year results of  
14 the Groningen Overweight and Lifestyle study. *Patient Educ Couns* 2012;**88**(2):249-55  
15 doi: 10.1016/j.pec.2012.03.017.
- 16 102. Barte JC, ter Bogt NC, Beltman FW, et al. Process evaluation of a lifestyle intervention in  
17 primary care: implementation issues and the participants' satisfaction of the GOAL study.  
18 *Health education & behavior* : the official publication of the Society for Public Health  
19 Education 2012;**39**(5):564-73 doi: 10.1177/1090198111422936.
- 20 103. ter Bogt NC, Bemelmans WJ, Beltman FW, et al. Preventing weight gain: one-year results of a  
21 randomized lifestyle intervention. *American journal of preventive medicine*  
22 2009;**37**(4):270-7 doi: 10.1016/j.amepre.2009.06.011.
- 23 104. ter Bogt NC, Bemelmans WJ, Beltman FW, et al. Preventing weight gain by lifestyle  
24 intervention in a general practice setting: three-year results of a randomized controlled  
25 trial. *Archives of internal medicine* 2011;**171**(4):306-13 doi:  
26 10.1001/archinternmed.2011.22.
- 27 105. ter Bogt NC, Milder IE, Bemelmans WJ, et al. Changes in lifestyle habits after counselling by  
28 nurse practitioners: 1-year results of the Groningen Overweight and Lifestyle study. *Public  
29 Health Nutr* 2011;**14**(6):995-1000 doi: 10.1017/s1368980010003708.
- 30 106. Thomas JG, Leahey TM, Wing RR. An automated internet behavioral weight-loss program by  
31 physician referral: a randomized controlled trial. *Diabetes care* 2015;**38**(1):9-15 doi:  
32 10.2337/dc14-1474.
- 33 107. Toth-Capelli KM, Brawer R, Plumb J, et al. Stage of change and other predictors of participant  
34 retention in a behavioral weight management program in primary care. *Health Promotion  
35 Practice* 2013;**14**(3):441-50
- 36 108. Tsai AG, Felton S, Hill JO, et al. A randomized pilot trial of a full subsidy vs. a partial subsidy  
37 for obesity treatment. *Obesity* 2012;**20**(9):1838-43
- 38 109. Wadden TA, Berkowitz RI, Womble LG, et al. Randomized Trial of Lifestyle Modification and  
39 Pharmacotherapy for Obesity. *The New England Journal of Medicine* 2005;**353**(20):2111-  
40 20
- 41 110. Wilson DB, Johnson RE, Jones RM, et al. Patient weight counseling choices and outcomes  
42 following a primary care and community collaborative intervention. *Patient Education and  
43 Counseling* 2010;**79**(3):338-43
- 44 111. Wirth A. Reduction of body weight and co-morbidities by orlistat: The XXL - Primary health  
45 care trial. *Diabetes, Obesity and Metabolism* 2005;**7**(1):21-27 doi: 10.1111/j.1463-  
46 1326.2004.00428.x.
- 47 112. Yardley L, Ware LJ, Smith ER, et al. Randomised controlled feasibility trial of a web-based  
48 weight management intervention with nurse support for obese patients in primary care.  
49 *The International Journal of Behavioral Nutrition and Physical Activity* Vol 11 May 2014,  
50 ArtID 67 2014;**11**
- 51 113. Tsai AG, Felton S, Wadden TA, et al. A randomized clinical trial of a weight loss maintenance  
52 intervention in a primary care population. *Obesity (Silver Spring, Md)* 2015;**23**(10):2015-  
53 21 doi: 10.1002/oby.21224.
- 54 114. Ryan DH, Johnson WD, Myers VH, et al. Nonsurgical weight loss for extreme obesity in  
55 primary care settings: results of the Louisiana Obese Subjects Study. *Archives of internal  
56 medicine* 2010;**170**(2):146-54 doi: 10.1001/archinternmed.2009.508.
- 57  
58  
59  
60

115. Baillargeon JP, Carpentier A, Donovan D, et al. Integrated obesity care management system - implementation and research protocol. *BMC health services research* 2007;**7**:163 doi: 10.1186/1472-6963-7-163.
116. Baillargeon JP, St-Cyr-Tribble D, Xhignesse M, et al. Impact of an integrated obesity management system on patient's care - research protocol. *BMC obesity* 2014;**1**:19 doi: 10.1186/s40608-014-0019-z.
117. Katz S, Feigenbaum A, Pasternak S, et al. An interactive course to enhance self-efficacy of family practitioners to treat obesity. *BMC medical education* 2005;**5**(1):4 doi: 10.1186/1472-6920-5-4.
118. Buclin-Thiebaud S, Pataky Z, Bruchez V, et al. New psycho-pedagogic approach to obesity treatment: a 5-year follow-up. *Patient Educ Couns* 2010;**79**(3):333-7 doi: 10.1016/j.pec.2009.11.001.
119. Feuerstein JS, Takayasu K, Maltz A, et al. Teaching a lifestyle intervention for reversing impaired fasting glucose, hyperlipidemia and obesity/overweight to a cohort of local physicians. *Current Nutrition and Food Science* 2015;**11**(1):65-69
120. Hartman SJ, Risica PM, Gans KM, et al. Tailored weight loss intervention in obese adults within primary care practice: Rationale, design, and methods of Choose to Lose. *Contemporary clinical trials* 2014;**38**(2):409-19 doi: 10.1016/j.cct.2014.06.001.
121. Lin M, Mahmooth Z, Dedhia N, et al. Tailored, interactive text messages for enhancing weight loss among African American adults: the TRIMM randomized controlled trial. *The American journal of medicine* 2015;**128**(8):896-904 doi: 10.1016/j.amjmed.2015.03.013.
122. Moore H, Summerbell CD, Greenwood DC, et al. Improving management of obesity in primary care: cluster randomised trial. *Bmj* 2003;**327**(7423):1085 doi: 10.1136/bmj.327.7423.1085.
123. Rodondi N, Humair JP, Ghali WA, et al. Counselling overweight and obese patients in primary care: a prospective cohort study. *European journal of cardiovascular prevention and rehabilitation : official journal of the European Society of Cardiology, Working Groups on Epidemiology & Prevention and Cardiac Rehabilitation and Exercise Physiology* 2006;**13**(2):222-8 doi: 10.1097/01.hjr.0000209819.13196.a4.
124. Rueda-Clausen CF, Benterud E, Bond T, et al. Effect of implementing the 5As of Obesity Management framework on provider-patient interactions in primary care. *Clinical Obesity* 2014;**4**(1):39-44 doi: 10.1111/cob.12038.
125. Schuster RJ, Tasosa J, Terwoord NA. Translational research--implementation of NHLBI Obesity Guidelines in a primary care community setting: the Physician Obesity Awareness Project. *The journal of nutrition, health & aging* 2008;**12**(10):764s-69s
126. Yank V, Stafford RS, Rosas LG, et al. Baseline reach and adoption characteristics in a randomized controlled trial of two weight loss interventions translated into primary care: a structured report of real-world applicability. *Contemporary clinical trials* 2013;**34**(1):126-35 doi: 10.1016/j.cct.2012.10.007.
127. Goodyear-Smith F, McPhee J, Duncan S, et al. Evaluation of a primary care-based programme designed to increase exercise and improve nutrition in patients at risk. *J Prim Health Care* 2014;**6**(4):312-8
128. Jay MR, Gillespie CC, Schlair SL, et al. The impact of primary care resident physician training on patient weight loss at 12 months. *Obesity (Silver Spring, Md)* 2013;**21**(1):45-50 doi: 10.1002/oby.20237.
129. Wadden TA, Berkowitz RI, Vogt RA, et al. Lifestyle Modification in the Pharmacologic Treatment of Obesity: A Pilot Investigation of a Potential Primary Care Approach. *Obesity research* 1997;**5**(3):218-26
130. Anderson DA, Wadden TA. Treating the obese patient. Suggestions for primary care practice. *Archives of family medicine* 1999;**8**(2):156-67
131. Rao G. Office-based strategies for the management of obesity. *Am Fam Physician* 2010;**81**(12):1449-56 ; quiz 29
132. Simkin-Silverman LR, Conroy MB, King WC. Treatment of Overweight and Obesity in Primary Care Practice: Current Evidence and Future Directions. *American Journal of Lifestyle Medicine* 2008;**2**(4):296-304 doi: 10.1177/1559827608317287.



133. Logue EE, Smucker WD. Obesity management in primary care: changing the status quo. *J Fam Pract* 2001;**50**(6):520
134. Lyznicki JM, Young DC, Riggs JA, et al. Obesity: assessment and management in primary care. *Am Fam Physician* 2001;**63**(11):2185-96
135. Sherman R, Crocker B, Dill D, et al. Health coaching integration into primary care for the treatment of obesity. *Global advances in health and medicine : improving healthcare outcomes worldwide* 2013;**2**(4):58-60 doi: 10.7453/gahmj.2013.017.
136. Vallis M, Piccinini-Vallis H, Sharma AM, et al. Modified 5 As: Minimal intervention for obesity counseling in primary care. *Canadian Family Physician* 2013;**59**(1):27-31+e1-e5
137. Benotti P. *Patient Preparation for Bariatric Surgery*. USA: Springer, 2014.
138. Brown W, Korin A, Burton P, et al. Laparoscopic adjustable gastric banding. *Australian family physician* 2009;**38**(12):972-6
139. Choban PS, Jackson B, Poplawski S, et al. Bariatric surgery for morbid obesity: why, who, when, how, where, and then what? *Cleveland Clinic journal of medicine* 2002;**69**(11):897-903
140. DeMaria EJ. Bariatric Surgery for Morbid Obesity. *New England Journal of Medicine* 2007;**356**(21):2176-83 doi: doi:10.1056/NEJMct067019.
141. Dixon JB. Referral for a bariatric surgical consultation: it is time to set a standard of care. *Obesity surgery* 2009;**19**(5):641-4 doi: 10.1007/s11695-008-9765-7.
142. Heber D, Greenway FL, Kaplan LM, et al. Endocrine and nutritional management of the post-bariatric surgery patient: an Endocrine Society Clinical Practice Guideline. *The Journal of clinical endocrinology and metabolism* 2010;**95**(11):4823-43 doi: 10.1210/jc.2009-2128.
143. Karmali S, Johnson Stoklossa C, Sharma A, et al. Bariatric surgery: a primer. *Canadian family physician Medecin de famille canadien* 2010;**56**(9):873-9
144. Pietras SM, Usdan LS, Apovian CM. Preoperative and Postoperative Management of the Bariatric Surgical Patient. *JCOM* 2007 **14**(5):262-74
145. Richardson LA. Bariatric society is here to help. *The Journal of Family Practice* 2010;**59**(9):488
146. Shafipour P, Der-Sarkissian JK, Hendee FN, et al. What Do I Do with My Morbidly Obese Patient? A Detailed Case Study of Bariatric Surgery in Kaiser Permanente Southern California. *The Permanente Journal* 2009;**13**(4):56-63
147. Snow V, Barry P, Fitterman N, et al. Pharmacologic and Surgical Management of Obesity in Primary Care: A Clinical Practice Guideline from the American College of Physicians. *Annals of internal medicine* 2005;**142**(7):525-31
148. Van Sickle KR. Management of the challenging bariatric surgical patient. *The Medical clinics of North America* 2007;**91**(3):383-92, x doi: 10.1016/j.mcna.2007.02.003.
149. Virji A, Murr MM. Caring for Patients After Bariatric Surgery. *American Family Physician* 2006;**73**(8):1403-08
150. Wilbert B, Shaw V, Andres A. Appetite Suppressants as Adjuncts for Weight Loss. *American Family Physician* 2011;**83**(7):1-2
151. Kolasa KM, Collier DN, Cable K. Weight loss strategies that really work. *The Journal of Family Practice* 2010;**59**(7):378-85
152. Mercer S. How useful are clinical guidelines for the management of obesity in general practice? *The British journal of general practice : the journal of the Royal College of General Practitioners* 2009;**59**(568):863-8 doi: 10.3399/bjgp09X472917.
153. Agency NHD. *Care pathways for the prevention and management of obesity*. London, UK: Health Development Agency, 2004.
154. Agrawal M, Worzniak M, Diamond L. Managing obesity like any other chronic condition. Long-term therapy may reduce comorbidity as well. *Postgraduate Medical Journal* 2000;**108**(1):75-82
155. Brunton SA, Skolnik NS, Ryan DH, et al. Management of obesity in adults. *The Journal of Family Practice* 2014;**63**(7):S1-S33
156. Bartlett S. Motivating patients toward weight loss: practical strategies for addressing overweight and obesity. *The Physician and Sportsmedicine* 2003;**31**(11):29-36

157. Benjamin RM, Yanovski SZ, Simons-Morton DG. Can primary care physician-driven community programs address the obesity epidemic among high-risk populations? *JAMA Intern Med* 2013;**173**(19):1778-9 doi: 10.1001/jamainternmed.2013.7776.
158. Birmingham CL, Jones P, Hoffer LJ. The management of adult obesity. *Eating and Weight Disorders* 2003;**8**:157-63
159. Caulfield T. Obesity, legal duties, and the family physician. *Canadian family physician Medecin de famille canadien* 2007;**53**:1129-30
160. Cerveny R. Approaching the obese patients in primary health care in the Czech Republic. *Bratislavské lekárske listy* 2007;**108**(9):425-27
161. Fitzpatrick SL, Wischenka D, Appelhans BM, et al. An Evidence-based Guide for Obesity Treatment in Primary Care. *The American journal of medicine* 2016;**129**(1):115 e1-7 doi: 10.1016/j.amjmed.2015.07.015.
162. Frank A. A multidisciplinary approach to obesity management: The physician's role and team care alternatives. *American Dietetic Association* 1998;**98**(10 supp 2):S44-48
163. Gandjour A. Development process of an evidence-based guideline for the treatment of obesity. *International Journal for Quality in Health Care* 2001;**13**(4):325-32 doi: 10.1093/intqhc/13.4.325.
164. Grief S. Strategies to Facilitate Weight Loss in Patients Who Are Obese. *Am Fam Physician* 2010;**82**(12):1434
165. Grima M, Dixon J. Obesity: Recommendations for management in general practice and beyond. *Australian family physician* 2013;**42**(8):532-41
166. Hagaman M. FP's patients are successful "losers". *The Journal of Family Practice* 2010;**59**(9):488
167. Hill J. Dealing With Obesity as a Chronic Disease. *Obesity research* 1998;**6**(supp 1):34S - 38S
168. Hill JO, Wyatt H. Outpatient Management of Obesity: A Primary Care Perspective. *Obesity research* 2002;**10**(supp 2):124S-30S
169. Iacobucci G. Pay GPs to tackle obesity, doctors urge UK government. *BMJ* 2014;**348**:g232 doi: 10.1136/bmj.g232.
170. Kausman R, Bruere T. If not dieting, now what? *Australian family physician* 2006;**35**(8):572-75
171. Kolasa K. Summary of clinical guidelines on the identification, evaluation, and treatment of overweight and obesity. *Journal of Nutrition Education* 1999;**31**(2):114
172. Kushner R. Tackling obesity: Is primary care up to the challenge? *Archives of internal medicine* 2010;**170**(2):121-23
173. Landau C, Moulton A. General principles in the primary care of obesity. *Rhode Island Medicine* 1992;**75**(11):527-30
174. Lenfant C. Physicians Need Practical Tools to Treat the Complex Problems of Overweight and Obesity. *American Family Physician* 2001;**63**(11):2139-46
175. Maryon-Davis A. Weight management in primary care: how can it be made more effective? *The Proceedings of the Nutrition Society* 2005;**64**(1):97-103
176. Mogul H, Rau J, Weinstein B, et al. New perspectives on diagnosis and treatment of obesity. *Heart Disease* 1999;**1**(5):295-304
177. Newton RL, Milsom VA, Nackers LM, et al. Supporting Behavior Change in Overweight Patients: A Guide for the Primary Care Physician. *JCOM* 2007;**15**(11):536-44
178. Nichols J, Bazemore A. Winnable battles: family physicians play an essential role in addressing tobacco use and obesity. *Am Fam Physician* 2014;**89**(11):872
179. Nonas CA. A model for chronic care of obesity through dietary treatment. *Journal of the American Dietetic Association* 1998;**98**(10 Suppl 2):S16-22
180. Orzano AJ, Scott JG. Diagnosis and treatment of obesity in adults: an applied evidence-based review. *The Journal of the American Board of Family Practice / American Board of Family Practice* 2004;**17**(5):359-69
181. Ossolinski G, Jiwa M, McManus A. Weight management practices and evidence for weight loss through primary care: a brief review. *Current medical research and opinion* 2015;**31**(11):2011-20 doi: 10.1185/03007995.2015.1082993.

182. Plourde G, Prud'homme D. Managing obesity in adults in primary care. *CMAJ : Canadian Medical Association Journal* 2012;**184**(9):1039-44 doi: 10.1503/cmaj.111640.
183. Rao G, Burke LE, Spring BJ, et al. New and emerging weight management strategies for busy ambulatory settings: a scientific statement from the American Heart Association endorsed by the Society of Behavioral Medicine. *Circulation* 2011;**124**(10):1182-203 doi: 10.1161/CIR.0b013e31822b9543.
184. Robinson BE, Gjerdingen DK, Houge DR. Obesity: a move from traditional to more patient-oriented management. *The Journal of the American Board of Family Practice / American Board of Family Practice* 1995;**8**(2):99-108
185. Ruser CB, Federman DG, Kashaf SS. Whittling away at obesity and overweight. *Small lifestyle changes can have the biggest impact. Postgraduate medicine* 2005;**117**(1):31-4, 37-40
186. Scherger J. Primary care physicians: On the front line in the fight against obesity. *Cardiovascular reviews and reports* 1999;**20**(5):268-70
187. Schlair S, Moore S, McMacken M, et al. How to Deliver High-Quality Obesity Counseling in Primary Care Using the 5As Framework. *JCOM* 2012;**19**(5):221-29
188. Spira M. Managing obesity in general practice. *The Practitioner* 1983;**227**(1378):625-9
189. Thompson WG, Cook DA, Clark MM, et al. Treatment of obesity. *Mayo Clinic proceedings* 2007;**82**(1):93-101; quiz 01-2 doi: 10.4065/82.1.93.
190. Tsai AG, Carvajal R, Egner R, et al. Obesity. In: DiTomasso R, Golden B, Morris H, eds. *Handbook of cognitive behavioral approaches in primary care*. New York: Springer Publishing Company, 2010:595-630.
191. Yanovski SZ. A practical approach to treatment of the obese patient. *Archives of family medicine* 1993;**2**(3):309-16
192. Association AM. Your Family Doctor – Keeping You Healthy; AMA FAMILY DOCTOR WEEK, 20-26 July 2014. Australia, 2014.
193. Zwar N, Harris M. Are GPs doing enough to help patients lose weight? *The Conversation*. Australia: The Conversation, 2013.
194. Hainer V. How should the obese patient be managed? Possible approaches to a national obesity management network. *International journal of obesity and related metabolic disorders : journal of the International Association for the Study of Obesity* 1999;**23 Suppl 4**:S14-8; discussion S18-9
195. Seidell JC, Halberstadt J, Noordam H, et al. An integrated health care standard for the management and prevention of obesity in The Netherlands. *Fam Pract* 2012;**29 Suppl 1**:i153-i56 doi: 10.1093/fampra/cmr057.
196. Anderson P. Reducing overweight and obesity: closing the gap between primary care and public health. *Fam Pract* 2008;**25 Suppl 1**:i10-6 doi: 10.1093/fampra/cmn060.
197. Jarvis S. Obesity and the overworked GP. *The British journal of general practice : the journal of the Royal College of General Practitioners* 2006;**56**(530):654-5
198. Lowery B. Medical Home Concept: Policy Implications for an Integrated Approach in Obesity Management. *Bariatric Nursing and Surgical Patient Care* 2010;**5**(1):89-91
199. van Avendonk MJ, Mensink PA, Drenthen AJ, et al. Primary care and public health a natural alliance? The introduction of the guidelines for obesity and undernutrition of the Dutch College of General Practitioners. *Fam Pract* 2012;**29 Suppl 1**:i31-35 doi: 10.1093/fampra/cmr095.
200. Al-Quaiz AJ. Current Concepts in the Management of Obesity. An Evidence Based Review. *Saudi Med J* 2001;**22**(3):205-10
201. Carvajal R, Wadden TA, Tsai AG, et al. Managing obesity in primary care practice: a narrative review. *Annals of the New York Academy of Sciences* 2013;**1281**:191-206 doi: 10.1111/nyas.12004.
202. Kushner RF, Ryan DH. Assessment and lifestyle management of patients with obesity: clinical recommendations from systematic reviews. *Jama* 2014;**312**(9):943-52 doi: 10.1001/jama.2014.10432.
203. Australia O. The mission of Obesity Australia is to drive change in the public perceptions of obesity, its prevalence and its treatment. *Action Agenda*. Australia, 2013.



- 1  
2  
3 204. Bourn J. Tackling Obesity in England. In: General CaA, ed. London: National Audit Office,  
4 2001.
- 5 205. Alexander SC, Cox ME, Boling Turer CL, et al. Do the five A's work when physicians counsel  
6 about weight loss? *Family medicine* 2011;**43**(3):179-84
- 7 206. Alexander SC, Cox ME, Yancy WS, et al. Weight-loss talks: what works (and what doesn't). *J*  
8 *Fam Pract* 2011;**60**(4):213-9
- 9 207. Klumbiene J, Petkeviciene J, Vaisvalavicius V, et al. Advising overweight persons about diet  
10 and physical activity in primary health care: Lithuanian health behaviour monitoring study.  
11 *BMC public health* 2006;**6**:30 doi: 10.1186/1471-2458-6-30.
- 12 208. Linne Y, Rooth P, Rossner S. Success rate of Orlistat in primary-care practice is limited by  
13 failure to follow prescribing recommendations: The referral letter content vs clinical reality.  
14 *International Journal of Obesity* 2003;**27**(11):1434-35
- 15 209. Patterson L, Patterson C, Kee F, et al. Prescribing for weight loss in primary care: Evidence  
16 from a population based study. *Journal of Epidemiology and Community Health*  
17 2013;**67**(5):530-32 doi: 10.1136/jech-2012-201995.
- 18 210. Hoyt A. Person, place, and prevention in primary care: A multilevel analysis of variation in the  
19 delivery of mental health, substance-use disorder, and obesity services. Dissertation  
20 Abstracts International Section A: Humanities and Social Sciences 2013;**73**(9-A(E)):No  
21 Pagination Specified
- 22 211. Fransen GA, Hiddink GJ, Koelen MA, et al. The development of a minimal intervention  
23 strategy to address overweight and obesity in adult primary care patients in The  
24 Netherlands. *Fam Pract* 2008;**25 Suppl 1**:i112-5 doi: 10.1093/fampra/cmn083.
- 25 212. Cohen R, Pinheiro JS, Correa JL, et al. Laparoscopic Roux-en-Y gastric bypass for BMI < 35  
26 kg/m(2): a tailored approach. *Surgery for obesity and related diseases : official journal of*  
27 *the American Society for Bariatric Surgery* 2006;**2**(3):401-4, discussion 04 doi:  
28 10.1016/j.soard.2006.02.011.
- 29 213. Fobi M, Lee H, Igwe D, et al. Gastric bypass in patients with BMI < 40 but > 32 without life-  
30 threatening co-morbidities: preliminary report. *Obesity surgery* 2002;**12**(1):52-6 doi:  
31 10.1381/096089202321144586.
- 32 214. Kloek CJ, Tol J, Veenhof C, et al. Dutch General Practitioners' weight management policy for  
33 overweight and obese patients. *BMC obesity* 2014;**1**(2)
- 34 215. Antognoli EL, Smith KJ, Mason MJ, et al. Direct observation of weight counselling in primary  
35 care: alignment with clinical guidelines. *clinical obesity* 2014;**4**:69-76 doi:  
36 10.1111/cob.12050.
- 37 216. GPs failing to offer weight-loss advice to people who need it. *Nursing Standard*  
38 2015;**29**(23):16 doi:  
39 <http://dx.doi.org.virtual.anu.edu.au/10.7748/ns.29.23.16.s20>[published  
40 Date]].
- 41 217. Binnie GA. Ten-year follow-up of obesity. *The Journal of the Royal College of General*  
42 *Practitioners* 1977;**27**(181):492-5
- 43 218. Bramlage P, Wittchen HU, Pittrow D, et al. Recognition and management of overweight and  
44 obesity in primary care in Germany. *International journal of obesity and related metabolic*  
45 *disorders : journal of the International Association for the Study of Obesity*  
46 2004;**28**(10):1299-308 doi: 10.1038/sj.ijo.0802752.
- 47 219. Kraschnewski JL, Sciamanna CN, Stuckey HL, et al. A Silent Response to the Obesity  
48 Epidemic: Decline in US Physician Weight Counseling. *Med Care* 2013;**51**:186-92
- 49 220. Morris SE, Lean ME, Hankey CR, et al. Who gets what treatment for obesity? A survey of GPs  
50 in Scotland. *Eur J Clin Nutr* 1999;**53 Suppl 2**:S44-8
- 51 221. Sammut D, Sammut D, Bonnici J. Audit of the diagnosis and management of adult obesity in  
52 a Maltese general practice. *Malta Medical Journal* 2012;**24**(1):16-20
- 53 222. Smith AW, Borowski LA, Liu B, et al. U.S. primary care physicians' diet-, physical activity-,  
54 and weight-related care of adult patients. *American journal of preventive medicine*  
55 2011;**41**(1):33-42 doi: 10.1016/j.amepre.2011.03.017.
- 56  
57  
58  
59  
60

- 1  
2  
3 223. Sonntag U, Henkel J, Renneberg B, et al. Counseling overweight patients: analysis of  
4 preventive encounters in primary care. *International Journal for Quality in Health Care*  
5 2010;**22**(6):486-92
- 6 224. Timmerman GM, Reifsnider E, Allan JD. Weight management practices among primary care  
7 providers. *Journal of the American Academy of Nurse Practitioners* 2000;**12**(4):113-6
- 8 225. Gaglioti A, Petterson SM, Bazemore AW, et al. Primary Care's Ecologic Impact on Obesity. *Am*  
9 *Fam Physician* 2009;**79**(6):446
- 10 226. Morris S, Gravelle H. GP supply and obesity. *Journal of Health Economics* 2008;**27**(5):1357-  
11 67
- 12 227. Huber CA, Mohler-Kuo M, Zellweger U, et al. Obesity management and continuing medical  
13 education in primary care: results of a Swiss survey. *BMC Fam Pract* 2011;**12**:140 doi:  
14 10.1186/1471-2296-12-140.
- 15 228. Asselin J, Osunlana AM, Ogunleye AA, et al. Missing an opportunity: the embedded nature of  
16 weight management in primary care. *Clin Obes* 2015;**5**(6):325-32 doi:  
17 10.1111/cob.12115.
- 18 229. Smoking, nutrition, alcohol, physical activity (SNAP): A population health guide to  
19 behavioural risk factors in general practice. Second edition ed. Melbourne: Royal Australian  
20 College of General Practitioners, 2015.
- 21 230. Managing adults who are overweight or obese. NICE guidelines. United Kingdom: National  
22 Institute for Health and Care Excellence, 2015.
- 23 231. Brauer P, Connor Gorber S, Shaw E, et al. Recommendations for prevention of weight gain  
24 and use of behavioural and pharmacologic interventions to manage overweight and obesity  
25 in adults in primary care. *CMAJ : Canadian Medical Association journal = journal de*  
26 *l'Association medicale canadienne* 2015;**187**(3):184-95 doi: 10.1503/cmaj.140887.
- 27 232. Prevention and Management of Obesity for Adults. In: Institute for Clinical Systems  
28 Improvement Health Care, ed. Sixth edition ed.  
29 [https://www.icsi.org/guidelines\\_more/catalog\\_guidelines\\_and\\_more/catalog\\_guidelines/c](https://www.icsi.org/guidelines_more/catalog_guidelines_and_more/catalog_guidelines/catalog_endocrine_guidelines/obesity_adults/)  
30 [atalog\\_endocrine\\_guidelines/obesity\\_adults/](https://www.icsi.org/guidelines_more/catalog_guidelines_and_more/catalog_guidelines/catalog_endocrine_guidelines/obesity_adults/), 2013.
- 31 233. Jensen MD, Ryan DH, Apovian CM, et al. 2013 AHA/ACC/TOS guideline for the management  
32 of overweight and obesity in adults: a report of the American College of  
33 Cardiology/American Heart Association Task Force on Practice Guidelines and The Obesity  
34 Society. *Circulation* 2014;**129**(25 Suppl 2):S102-38 doi:  
35 10.1161/01.cir.0000437739.71477.ee.
- 36 234. Group. NZG. New Zealand Primary Care Handbook 2012. Third edition ed. Wellington, New  
37 Zealand: New Zealand Guidelines Group, 2012.
- 38 235. U.S. Preventive Services Task Force: Screening for and Management of Obesity in Adults:  
39 Recommendation Statement. *Am Fam Physician* 2012;**86**(10):online
- 40 236. Moyer VA. Screening for and management of obesity in adults: U.S. Preventive Services Task  
41 Force recommendation statement. *Annals of internal medicine* 2012;**157**(5):373-8 doi:  
42 10.7326/0003-4819-157-5-201209040-00475.
- 43 237. Overweight. Guidelines for preventive activities in general practice. 8th edition ed.  
44 Melbourne: Royal Australian College of General Practitioners, 2012.
- 45 238. National Aboriginal Community Controlled Health Organisation (NACCHO) and The Royal  
46 Australian College of General Practitioners (RACGP). Overweight/Obesity. National guide to  
47 a preventive health assessment for Aboriginal and Torres Strait Islander people. Second  
48 edition ed. Melbourne: Royal Australian College of General Practitioners, 2012.
- 49 239. Committee. GaPA. Overweight and Obese Adults: Diagnosis and Management. In: Association  
50 BCM, ed. British Columbia: British Columbia Medical Association, 2011.
- 51 240. Mathus-Vliegen L, Toouli J, Fried M, et al. Obesity. In: Organisation WG, ed.  
52 [http://www.worldgastroenterology.org/guidelines/global-guidelines/obesity/obesity-](http://www.worldgastroenterology.org/guidelines/global-guidelines/obesity/obesity-english)  
53 [english](http://www.worldgastroenterology.org/guidelines/global-guidelines/obesity/obesity-english), 2011.
- 54 241. Management of Obesity: A national clinical guideline. In: Scottish Intercollegiate Guidelines  
55 Network, ed. Edinburgh: Scottish Intercollegiate Guidelines Network, 2010.
- 56 242. Binsbergen JV, Langens F, Dapper A, et al. Obesity. In: Dutch College of General  
57 Practitioners, ed. <https://guidelines.nhg.org/product/obesity>, 2010.

1  
2  
3  
4  
5  
6  
7  
8  
9  
10  
11  
12  
13  
14  
15  
16  
17  
18  
19  
20  
21  
22  
23  
24  
25  
26  
27  
28  
29  
30  
31  
32  
33  
34  
35  
36  
37  
38  
39  
40  
41  
42  
43  
44  
45  
46  
47  
48  
49  
50  
51  
52  
53  
54  
55  
56  
57  
58  
59  
60

243. Interventions on Diet and Physical Activity: What works.  
<http://www.who.int/dietphysicalactivity/summary-report-09.pdf?ua=1>: World Health Organisation, 2009.

For peer review only

**Table 1 – Number of different interventions identified in scoping review that describe a role for the family doctor in primary care obesity management - by country where the intervention was undertaken, and study design**

| <b>Country of Intervention</b> |           | <b>Study Design</b>          |           |
|--------------------------------|-----------|------------------------------|-----------|
| Australia                      | 2         | RCT                          | 40        |
| Canada                         | 5         | Single arm trial             | 21        |
| Denmark                        | 1         | Cohort                       | 7         |
| Germany                        | 3         | Non-randomised two arm trial | 2         |
| Israel                         | 2         | Cost effectiveness           | 2         |
| Italy                          | 1         | Action research (protocol)   | 1         |
| Japan                          | 1         | Case control                 | 1         |
| Netherlands                    | 3         | Clinical audit               | 1         |
| New Zealand                    | 2         | Cross sectional              | 1         |
| Scotland                       | 1         | Educational intervention     | 1         |
| Spain                          | 1         |                              |           |
| Switzerland                    | 4         |                              |           |
| United Kingdom                 | 5         |                              |           |
| UK/Australia/Germany           | 1         |                              |           |
| UK/Scotland                    | 1         |                              |           |
| United States of America       | 44        |                              |           |
| <b>Total</b>                   | <b>77</b> | <b>Total</b>                 | <b>77</b> |

**TABLE 2: Interventions in primary care in the management of adult obesity involving the general practitioner (over 7 pages)**

| Author                                   | Multiple <sup>21-22</sup>   | Multiple <sup>23-29</sup> | Bolognesi <sup>30</sup> | Bodenlos <sup>31</sup> | Kerr et al <sup>32</sup> | Multiple <sup>33-35</sup> | Multiple <sup>36-39</sup> | Multiple <sup>40-46</sup> | Tsai et al <sup>47</sup> | Banerjee et al <sup>48</sup> | Blonstein et al <sup>49</sup> | Barnes et al <sup>50</sup> |
|------------------------------------------|-----------------------------|---------------------------|-------------------------|------------------------|--------------------------|---------------------------|---------------------------|---------------------------|--------------------------|------------------------------|-------------------------------|----------------------------|
| Name of intervention                     | Meal replacements in weight | Counterweight             | PACE                    | NA                     | NA                       | Be Fit Be Well            | POWER                     | POWER-UP                  | NA                       | NA                           | NA                            | NA                         |
| Number of papers                         | 2                           | 7                         | 1                       | 1                      | 1                        | 3                         | 4                         | 8                         | 1                        | 1                            | 1                             | 1                          |
| Country                                  | USA                         | UK/Scotland               | Italy                   | USA                    | USA                      | USA                       | USA                       | USA                       | USA                      | USA                          | USA                           | USA                        |
| Year                                     | 2001                        | 2004-12                   | 2006                    | 2007                   | 2008                     | 2009-13                   | 2009-15                   | 2009-15                   | 2010                     | 2013                         | 2013                          | 2015                       |
| Design                                   | RCT                         | Cohort/single arm         | RCT                     | RCT                    | RCT                      | RCT                       | RCT/Cohort                | RCT                       | RCT                      | RCT                          | Single arm trial              | Single arm trial           |
| Diagnosis                                |                             | X                         | X                       |                        |                          |                           | X                         | X                         | X                        |                              | X                             | X                          |
| Recruitment into the trial               | X                           | X                         |                         |                        |                          |                           | X                         | X                         | X                        |                              | X                             |                            |
| Co-ordination                            |                             |                           |                         |                        |                          | X                         | X                         | X                         |                          |                              | X                             |                            |
| Weight and height                        |                             | X                         | X                       |                        |                          |                           |                           |                           | X                        |                              |                               |                            |
| Waist circumference                      |                             |                           | X                       |                        |                          |                           |                           |                           |                          |                              |                               |                            |
| System level/implementation              |                             |                           |                         |                        |                          |                           |                           |                           |                          |                              |                               |                            |
| Doctor-patient relationship              |                             |                           | X                       | X                      |                          |                           | X                         |                           |                          |                              |                               |                            |
| Public health role                       |                             |                           |                         |                        |                          |                           |                           |                           |                          |                              |                               |                            |
| Prevention                               |                             |                           |                         |                        |                          |                           |                           |                           |                          |                              |                               |                            |
| Nutrition education                      | X                           |                           |                         | X                      |                          |                           |                           | X                         | X                        |                              |                               |                            |
| Physical activity education              | X                           |                           | X                       | X                      |                          |                           |                           | X                         | X                        |                              |                               |                            |
| Behaviour modification                   | X                           |                           | X                       | X                      |                          |                           |                           |                           |                          |                              |                               |                            |
| Counselling/psychology                   |                             |                           | X                       |                        |                          |                           |                           |                           |                          |                              |                               |                            |
| Role modelling                           |                             |                           |                         |                        |                          |                           |                           |                           |                          |                              |                               |                            |
| Group based interventions                |                             |                           |                         |                        |                          |                           |                           |                           |                          |                              |                               |                            |
| Medications                              |                             |                           |                         |                        |                          |                           |                           | X                         |                          |                              |                               |                            |
| Bariatric surgery referral               |                             |                           |                         |                        |                          |                           |                           |                           |                          |                              |                               |                            |
| Bariatric surgery work-up                |                             |                           |                         |                        |                          |                           |                           |                           |                          |                              |                               |                            |
| Bariatric surgery after care             |                             |                           |                         |                        |                          |                           |                           |                           |                          |                              |                               |                            |
| Commercial weight loss program referral  |                             |                           |                         |                        |                          |                           |                           |                           |                          |                              |                               |                            |
| Bariatric equipment in consultation room |                             |                           |                         |                        |                          |                           |                           |                           |                          |                              |                               |                            |
| Standard care undefined                  |                             |                           |                         |                        |                          |                           |                           |                           |                          |                              |                               |                            |
| Standard care was used                   |                             |                           | X                       |                        | X                        | X                         | X                         | X                         |                          | X                            |                               |                            |
| Exact role uncertain                     |                             |                           |                         |                        |                          |                           |                           |                           |                          | X                            |                               |                            |
| Person centredness                       |                             |                           | X                       | X                      |                          |                           |                           |                           |                          |                              |                               |                            |
| Whole person care                        |                             |                           | X                       | X                      |                          |                           | X                         | X                         |                          |                              |                               |                            |

| Author | Booth et al <sup>51</sup> | Bordowitz et al <sup>52</sup> | Bowerman et al <sup>53</sup> | Clark et al <sup>54-55</sup> | Coupar et al <sup>56</sup> | Cutler et al <sup>57</sup> | Doering et al <sup>58</sup> | Dutton et al <sup>59</sup> | Eichler et al <sup>60</sup> |
|--------|---------------------------|-------------------------------|------------------------------|------------------------------|----------------------------|----------------------------|-----------------------------|----------------------------|-----------------------------|
|--------|---------------------------|-------------------------------|------------------------------|------------------------------|----------------------------|----------------------------|-----------------------------|----------------------------|-----------------------------|

|                                          |                  |                 |                  |                                        |                  |                  |                  |                  |                  |
|------------------------------------------|------------------|-----------------|------------------|----------------------------------------|------------------|------------------|------------------|------------------|------------------|
| Name of intervention                     | NA               | NA              | NA               | Primary care weight management program | NA               | NA               | NA               | NA               | NA               |
| Number of papers                         | 1                | 1               | 1                | 2                                      | 1                | 1                | 1                | 1                | 1                |
| Country                                  | Australia        | USA             | USA              | USA                                    | Scotland         | New Zealand      | USA              | USA              | Switzerland      |
| Year                                     | 2006             | 2007            | 2001             | 2008-10                                | 1980             | 2010             | 2013             | 2015             | 2007             |
| Design                                   | Single arm trial | Cross sectional | Single arm trial | Single arm trial                       | Single arm trial | Single arm trial | Single arm trial | Single arm trial | Single arm trial |
| Diagnosis                                | X                | X               | X                | X                                      | X                |                  |                  | X                | X                |
| Recruitment into the trial               |                  | X               | X                | X                                      | X                | X                |                  | X                | X                |
| Co-ordination                            |                  | X               | X                |                                        | X                |                  |                  |                  |                  |
| Weight and height                        | X                |                 | X                |                                        | X                |                  |                  |                  | X                |
| Waist circumference                      | X                |                 |                  |                                        |                  |                  |                  |                  |                  |
| System level/implementation              |                  |                 |                  |                                        |                  |                  |                  |                  |                  |
| Doctor-patient relationship              |                  |                 |                  |                                        |                  |                  |                  |                  | X                |
| Public health role                       |                  |                 |                  |                                        |                  |                  |                  |                  |                  |
| Prevention                               | X                |                 |                  |                                        |                  |                  |                  |                  |                  |
| Nutrition education                      | X                | X               |                  |                                        | X                |                  |                  |                  | X                |
| Physical activity education              | X                | X               |                  |                                        |                  |                  |                  |                  |                  |
| Behaviour modification                   | X                | X               |                  |                                        |                  |                  |                  |                  | X                |
| Counselling/psychology                   |                  | X               |                  |                                        |                  |                  |                  |                  | X                |
| Role modelling                           |                  |                 |                  |                                        | X                |                  |                  |                  |                  |
| Group based interventions                |                  |                 |                  |                                        | X                |                  |                  |                  | X                |
| Medications                              |                  |                 | X                |                                        |                  |                  |                  |                  |                  |
| Bariatric surgery referral               |                  |                 |                  |                                        |                  |                  |                  |                  |                  |
| Bariatric surgery work-up                |                  |                 |                  |                                        |                  |                  |                  |                  |                  |
| Bariatric surgery after care             |                  |                 |                  |                                        |                  |                  |                  |                  |                  |
| Commercial weight loss program referral  |                  |                 |                  |                                        |                  |                  |                  |                  |                  |
| Bariatric equipment in consultation room |                  |                 |                  |                                        |                  |                  |                  |                  |                  |
| Standard care undefined                  |                  |                 |                  |                                        |                  |                  |                  |                  |                  |
| Standard care was used                   |                  |                 |                  |                                        |                  |                  |                  |                  |                  |
| Exact role uncertain                     |                  |                 |                  |                                        |                  |                  |                  |                  |                  |
| Person centredness                       | X                |                 |                  |                                        |                  |                  |                  |                  |                  |
| Whole person care                        | X                | X               |                  |                                        |                  |                  |                  |                  |                  |

| Author                                   | Ely et al <sup>61</sup> | Feigenbaum et al <sup>62</sup> | Kanke et al <sup>63</sup> | Multiple <sup>64-66</sup>       | Huerta et al <sup>67</sup> | Garies et al <sup>68</sup> | Gusi et al <sup>69</sup> | Haas et al <sup>70</sup> | Multiple <sup>71-73</sup> | Hauner et al <sup>74</sup> | Hoke et al <sup>75</sup> |
|------------------------------------------|-------------------------|--------------------------------|---------------------------|---------------------------------|----------------------------|----------------------------|--------------------------|--------------------------|---------------------------|----------------------------|--------------------------|
| Name of intervention                     | NA                      | NA                             | NA                        | Commercial weight loss referral | NA                         | NA                         | NA                       | NA                       | Lighten-Up                | NA                         | NA                       |
| Number of papers                         | 1                       | 1                              | 1                         | 3                               | 1                          | 1                          | 1                        | 1                        | 3                         | 1                          | 1                        |
| Country                                  | USA                     | Israel                         | Japan                     | UK/Australia/Germany            | USA                        | Canada                     | Spain                    | USA                      | UK                        | Germany                    | USA                      |
| Year                                     | 2008                    | 2005                           | 2015                      | 2011-14                         | 2004                       | 2015                       | 2008                     | 2012                     | 2010-12                   | 2004                       | 2002                     |
| Design                                   | RCT                     | Two arm, non randomised        | RCT                       | RCT                             | Cohort                     | Cohort                     | RCT                      | Cohort                   | RCT                       | RCT                        | Single arm trial         |
| Diagnosis                                | X                       |                                |                           | X                               | X                          | X                          | X                        | X                        | X                         | X                          | X                        |
| Recruitment into the trial               | X                       | X                              |                           | X                               | X                          | X                          | X                        | X                        | X                         | X                          | X                        |
| Co-ordination                            | X                       | X                              |                           |                                 | X                          |                            |                          |                          |                           |                            |                          |
| Weight and height                        | X                       | X                              |                           | X                               | X                          | X                          | X                        | X                        |                           | X                          |                          |
| Waist circumference                      |                         |                                |                           | X                               |                            |                            |                          |                          |                           | X                          |                          |
| System level/implementation              |                         |                                |                           |                                 |                            |                            |                          |                          |                           |                            |                          |
| Doctor-patient relationship              | X                       |                                | X                         |                                 |                            | X                          |                          |                          |                           |                            |                          |
| Public health role                       |                         |                                |                           |                                 |                            |                            |                          |                          |                           |                            |                          |
| Prevention                               |                         |                                |                           |                                 |                            |                            |                          |                          |                           |                            |                          |
| Nutrition education                      |                         | X                              | X                         | X                               |                            | X                          |                          | X                        |                           |                            |                          |
| Physical activity education              |                         |                                | X                         | X                               |                            | X                          |                          | X                        |                           |                            |                          |
| Behaviour modification                   |                         | X                              |                           |                                 |                            |                            |                          | X                        |                           |                            |                          |
| Counselling/psychology                   |                         |                                |                           |                                 |                            |                            |                          | X                        |                           |                            |                          |
| Role modelling                           |                         |                                |                           |                                 |                            |                            |                          |                          |                           |                            |                          |
| Group based interventions                |                         |                                |                           |                                 |                            |                            |                          |                          |                           |                            |                          |
| Medications                              |                         | X                              |                           |                                 |                            |                            |                          |                          |                           | X                          |                          |
| Bariatric surgery referral               |                         |                                |                           |                                 |                            |                            |                          |                          |                           |                            |                          |
| Bariatric surgery work-up                |                         |                                |                           |                                 |                            |                            |                          |                          |                           |                            |                          |
| Bariatric surgery after care             |                         |                                |                           |                                 |                            |                            |                          |                          |                           |                            |                          |
| Commercial weight loss program referral  |                         |                                |                           | X                               |                            |                            |                          |                          |                           |                            |                          |
| Bariatric equipment in consultation room |                         |                                |                           |                                 |                            |                            |                          |                          |                           |                            |                          |
| Standard care undefined                  |                         |                                |                           |                                 |                            |                            |                          |                          |                           |                            |                          |
| Standard care was used                   | X                       |                                | X                         | X                               |                            |                            | X                        |                          |                           |                            |                          |
| Exact role uncertain                     |                         |                                |                           |                                 |                            |                            |                          |                          |                           |                            |                          |
| Person centredness                       |                         |                                |                           |                                 |                            |                            |                          |                          |                           |                            |                          |
| Whole person care                        |                         |                                | X                         |                                 |                            |                            |                          |                          |                           |                            |                          |

| Author                                   | Kumanyika et al <sup>76</sup><br>77 | Kuppersmith et al <sup>78</sup> | Laing et al <sup>79</sup> | Lewis et al <sup>80</sup> | Logue et al <sup>81</sup><br>82                                               | Logue et al <sup>83</sup> | Lowe et al <sup>84</sup> | Madigan et al <sup>85</sup> | Martin et al <sup>86</sup><br>87                       | McDoniel et al <sup>88</sup><br>89 | Mehring et al <sup>90</sup> |
|------------------------------------------|-------------------------------------|---------------------------------|---------------------------|---------------------------|-------------------------------------------------------------------------------|---------------------------|--------------------------|-----------------------------|--------------------------------------------------------|------------------------------------|-----------------------------|
| Name of intervention                     | Think Health                        | NA                              | NA                        | NA                        | Translational Model-<br>ical Model-<br>Chronic<br>Disease Care<br>for Obesity | NA                        | NA                       | NA                          | A Primary<br>Care Weight<br>Management<br>Intervention | The SMART<br>motivational<br>trial | NA                          |
| Number of papers                         | 2                                   | 1                               | 1                         | 1                         | 2                                                                             | 1                         | 1                        | 1                           | 2                                                      | 2                                  | 1                           |
| Country                                  | USA                                 | USA                             | USA                       | UK                        | USA                                                                           | USA                       | USA                      | UK                          | USA                                                    | USA                                | Germany                     |
| Year                                     | 2011-12                             | 2006                            | 2014                      | 2013                      | 2000-2005                                                                     | 2012                      | 2014                     | 2014                        | 2006-08                                                | 2009-10                            | 2013                        |
| Design                                   | RCT                                 | Single arm trial                | RCT                       | RCT                       | RCT                                                                           | RCT                       | RCT                      | RCT                         | RCT                                                    | Single arm trial                   | RCT                         |
| Diagnosis                                | X                                   |                                 |                           |                           | X                                                                             |                           | X                        | X                           |                                                        | X                                  | X                           |
| Recruitment into the trial               | X                                   |                                 |                           |                           | X                                                                             | X                         | X                        | X                           | X                                                      | X                                  | X                           |
| Co-ordination                            |                                     | X                               |                           |                           | X                                                                             |                           |                          |                             |                                                        | X                                  | X                           |
| Weight and height                        |                                     |                                 |                           |                           |                                                                               |                           |                          |                             | X                                                      | X                                  | X                           |
| Waist circumference                      |                                     |                                 |                           |                           |                                                                               |                           |                          |                             |                                                        |                                    | X                           |
| System level/implementation              |                                     |                                 |                           |                           |                                                                               |                           |                          |                             |                                                        |                                    |                             |
| Doctor-patient relationship              |                                     |                                 |                           |                           |                                                                               |                           |                          |                             | X                                                      | X                                  | X                           |
| Public health role                       |                                     |                                 |                           |                           |                                                                               |                           |                          |                             |                                                        |                                    |                             |
| Prevention                               |                                     |                                 |                           |                           |                                                                               |                           |                          |                             |                                                        |                                    |                             |
| Nutrition education                      | X                                   | X                               |                           |                           |                                                                               |                           |                          |                             | X                                                      |                                    |                             |
| Physical activity education              | X                                   |                                 |                           |                           |                                                                               |                           |                          |                             | X                                                      |                                    |                             |
| Behaviour modification                   | X                                   |                                 |                           |                           |                                                                               |                           |                          |                             | X                                                      |                                    | X                           |
| Counselling/psychology                   | X                                   |                                 |                           |                           |                                                                               |                           |                          |                             | X                                                      |                                    | X                           |
| Role modelling                           |                                     |                                 |                           |                           |                                                                               |                           |                          |                             |                                                        |                                    |                             |
| Group based interventions                |                                     |                                 |                           |                           |                                                                               |                           |                          |                             |                                                        |                                    |                             |
| Medications                              |                                     | X                               |                           |                           |                                                                               |                           |                          |                             |                                                        |                                    |                             |
| Bariatric surgery referral               |                                     | X                               |                           |                           |                                                                               |                           |                          |                             |                                                        |                                    |                             |
| Bariatric surgery work-up                |                                     |                                 |                           |                           |                                                                               |                           |                          |                             |                                                        |                                    |                             |
| Bariatric surgery after care             |                                     |                                 |                           |                           |                                                                               |                           |                          |                             |                                                        |                                    |                             |
| Commercial weight loss program referral  |                                     |                                 |                           | X                         |                                                                               |                           |                          |                             |                                                        |                                    |                             |
| Bariatric equipment in consultation room |                                     |                                 |                           |                           |                                                                               |                           |                          |                             |                                                        |                                    |                             |
| Standard care undefined                  |                                     | X                               | X                         |                           |                                                                               |                           |                          |                             | X                                                      |                                    | X                           |
| Standard care was used                   |                                     | X                               | X                         |                           |                                                                               |                           |                          | X                           | X                                                      |                                    | X                           |
| Exact role uncertain                     |                                     |                                 |                           |                           |                                                                               |                           |                          |                             |                                                        |                                    |                             |
| Person centredness                       |                                     |                                 |                           |                           | X                                                                             |                           |                          |                             | X                                                      |                                    | X                           |
| Whole person care                        |                                     | X                               |                           |                           | X                                                                             |                           |                          |                             | X                                                      |                                    | X                           |



| Author                                   | Munsch et al <sup>91</sup> | O'Grady et al <sup>92</sup> | Olsen et al <sup>93</sup> | Pellegrini et al <sup>94</sup> | Richman et al <sup>95</sup> | Ross et al <sup>96,97</sup> | Rutten et al <sup>98</sup> | Saris et al <sup>99</sup> | Stephens et al <sup>100</sup> | Multiple <sup>101-105</sup> | Thomas et al <sup>106</sup> | Toth-Capelli et al <sup>107</sup> |
|------------------------------------------|----------------------------|-----------------------------|---------------------------|--------------------------------|-----------------------------|-----------------------------|----------------------------|---------------------------|-------------------------------|-----------------------------|-----------------------------|-----------------------------------|
| Name of intervention                     | NA                         | NA                          | NA                        | NA                             | NA                          | PROACTIVE                   | NA                         | NA                        | NA                            | Groningen Overweight        | NA                          | NA                                |
| Number of papers                         | 1                          | 1                           | 1                         | 1                              | 1                           | 2                           | 1                          | 1                         | 1                             | 5                           | 1                           | 1                                 |
| Country                                  | Switzerland                | USA                         | Denmark                   | USA                            | Australia                   | Canada                      | Netherlands                | Netherlands               | USA                           | Netherlands                 | USA                         | USA                               |
| Year                                     | 2003                       | 2013                        | 2005                      | 2014                           | 1996                        | 2009-12                     | 2014                       | 1992                      | 2008                          | 2009-12                     | 2015                        | 2013                              |
| Design                                   | RCT                        | Clinical audit              | Cost effectiveness        | RCT                            | Case control                | RCT                         | Cohort                     | Single arm trial          | Cohort                        | Single arm, RCT             | RCT                         | Single arm trial                  |
| Diagnosis                                |                            |                             | X                         |                                | X                           | X                           | X                          | X                         |                               |                             | X                           | X                                 |
| Recruitment into the trial               |                            |                             | X                         |                                | X                           | X                           | X                          | X                         |                               |                             | X                           | X                                 |
| Co-ordination                            | X                          |                             |                           |                                | X                           |                             |                            | X                         |                               |                             | X                           |                                   |
| Weight and height                        | X                          | X                           | X                         |                                | X                           |                             |                            | X                         |                               |                             | X                           |                                   |
| Waist circumference                      |                            |                             | X                         |                                | X                           |                             |                            |                           |                               |                             |                             |                                   |
| System level/implementation              |                            |                             |                           |                                |                             |                             |                            |                           |                               |                             |                             |                                   |
| Doctor-patient relationship              |                            |                             |                           |                                | X                           |                             |                            |                           |                               |                             | X                           |                                   |
| Public health role                       |                            |                             |                           |                                |                             |                             |                            |                           |                               |                             |                             |                                   |
| Prevention                               |                            |                             |                           |                                |                             |                             |                            |                           |                               |                             |                             |                                   |
| Nutrition education                      | X                          |                             | X                         |                                | X                           |                             |                            |                           |                               |                             |                             |                                   |
| Physical activity education              | X                          |                             |                           |                                | X                           |                             |                            |                           |                               |                             |                             |                                   |
| Behaviour modification                   | X                          |                             |                           |                                | X                           |                             |                            |                           |                               |                             |                             |                                   |
| Counselling/psychology                   | X                          |                             |                           |                                |                             |                             |                            |                           |                               |                             |                             |                                   |
| Role modelling                           |                            |                             |                           |                                |                             |                             |                            |                           |                               |                             |                             |                                   |
| Group based interventions                | X                          |                             |                           |                                |                             |                             |                            |                           |                               |                             |                             |                                   |
| Medications                              |                            |                             |                           |                                |                             |                             |                            |                           |                               |                             |                             |                                   |
| Bariatric surgery referral               |                            |                             |                           |                                |                             |                             |                            |                           |                               |                             |                             |                                   |
| Bariatric surgery work-up                |                            |                             |                           |                                |                             |                             |                            |                           |                               |                             |                             |                                   |
| Bariatric surgery after care             |                            |                             |                           |                                |                             |                             |                            |                           |                               |                             |                             |                                   |
| Commercial weight loss program referral  |                            |                             |                           |                                |                             |                             |                            |                           |                               |                             |                             |                                   |
| Bariatric equipment in consultation room |                            |                             |                           |                                |                             |                             |                            |                           |                               |                             |                             |                                   |
| Standard care undefined                  | X                          | X                           |                           |                                |                             | X                           |                            |                           | X                             | X                           |                             |                                   |
| Standard care used                       | X                          | X                           |                           |                                |                             | X                           |                            |                           | X                             | X                           |                             |                                   |
| Exact role uncertain                     |                            |                             |                           | X                              |                             |                             |                            |                           |                               |                             |                             |                                   |
| Person centredness                       |                            |                             |                           |                                | X                           |                             |                            |                           |                               |                             |                             |                                   |
| Whole person care                        |                            | X                           |                           |                                | X                           |                             |                            |                           |                               |                             | X                           |                                   |

| Author                                   | Tsai et al <sup>108</sup> | Wadden et al <sup>109</sup> | Wilson et al <sup>110</sup>  | Wirth et al <sup>111</sup> | Yardley et al <sup>112</sup> | Tsai et al <sup>113</sup> | Ryan et al <sup>114</sup> | Baillargeon et al <sup>115</sup> | Baillargeon et al <sup>116</sup> | Katz et al <sup>117</sup> | Buclin-Thiebaud et al <sup>118</sup> | Feuerstein et al <sup>119</sup> |
|------------------------------------------|---------------------------|-----------------------------|------------------------------|----------------------------|------------------------------|---------------------------|---------------------------|----------------------------------|----------------------------------|---------------------------|--------------------------------------|---------------------------------|
| Name of intervention                     | NA                        | NA                          | NA                           | NA                         | NA                           | NA                        | NA                        | NA                               | NA                               | NA                        | NA                                   | NA                              |
| Number of papers                         | 1                         | 1                           | 1                            | 1                          | 1                            | 1                         | 1                         | 1                                | 1                                | 1                         | 1                                    | 1                               |
| Country                                  | USA                       | USA                         | USA                          | Germany                    | UK                           | USA                       | USA                       | Canada                           | Canada                           | Israel                    | Switzerland                          | USA                             |
| Year                                     | 2012                      | 2005                        | 2010                         | 2005                       | 2014                         | 2015                      | 2010                      | 2007                             | 2014                             | 2005                      | 2010                                 | 2015                            |
| Design                                   | Cost effectiveness        | RCT                         | Non-randomised two arm trial | Single arm trial           | RCT                          | RCT                       | RCT                       | Action research (protocol)       | RCT (protocol)                   | Educational intervention  | Single arm trial                     | Single arm trial                |
| Diagnosis                                |                           |                             | X                            | X                          |                              |                           | X                         |                                  |                                  | X                         |                                      | X                               |
| Recruitment into the trial               |                           | X                           | X                            | X                          |                              |                           | X                         |                                  |                                  |                           |                                      |                                 |
| Co-ordination                            |                           |                             | X                            | X                          |                              |                           | X                         |                                  | X                                | X                         |                                      |                                 |
| Weight and height                        |                           |                             | X                            | X                          |                              |                           | X                         |                                  | X                                |                           |                                      | X                               |
| Waist circumference                      |                           |                             |                              |                            |                              |                           | X                         |                                  | X                                |                           |                                      |                                 |
| System level/implementation              |                           |                             |                              |                            |                              |                           |                           |                                  |                                  |                           |                                      |                                 |
| Doctor-patient relationship              |                           |                             |                              |                            |                              |                           |                           |                                  |                                  |                           |                                      |                                 |
| Public health role                       |                           |                             |                              |                            |                              |                           |                           |                                  |                                  |                           |                                      |                                 |
| Prevention                               |                           |                             |                              |                            |                              |                           |                           |                                  |                                  |                           |                                      |                                 |
| Nutrition education                      |                           |                             |                              | X                          |                              |                           | X                         |                                  | X                                | X                         |                                      | X                               |
| Physical activity education              |                           |                             |                              | X                          |                              |                           |                           |                                  | X                                | X                         |                                      |                                 |
| Behaviour modification                   |                           |                             |                              | X                          |                              |                           |                           |                                  | X                                | X                         |                                      |                                 |
| Counselling/psychology                   |                           |                             |                              |                            |                              |                           |                           |                                  |                                  |                           |                                      |                                 |
| Role modelling                           |                           |                             |                              |                            |                              |                           |                           |                                  |                                  |                           |                                      |                                 |
| Group based interventions                |                           |                             |                              | X                          |                              |                           |                           |                                  |                                  |                           |                                      |                                 |
| Medications                              |                           |                             |                              | X                          |                              |                           | X                         |                                  |                                  | X                         |                                      |                                 |
| Bariatric surgery referral               |                           |                             |                              |                            |                              |                           |                           |                                  |                                  | X                         |                                      |                                 |
| Bariatric surgery work-up                |                           |                             |                              |                            |                              |                           |                           |                                  |                                  |                           |                                      |                                 |
| Bariatric surgery after care             |                           |                             |                              |                            |                              |                           |                           |                                  |                                  |                           |                                      |                                 |
| Commercial weight loss program referral  |                           |                             |                              |                            |                              |                           |                           |                                  |                                  |                           |                                      |                                 |
| Bariatric equipment in consultation room |                           |                             |                              |                            |                              |                           |                           |                                  |                                  |                           |                                      |                                 |
| Standard care undefined                  |                           |                             | X                            |                            | X                            |                           |                           |                                  |                                  |                           |                                      |                                 |
| Standard care was used                   |                           |                             | X                            |                            | X                            |                           | X                         |                                  |                                  |                           |                                      |                                 |
| Exact role uncertain                     |                           |                             |                              |                            |                              |                           |                           | X                                |                                  |                           | X                                    |                                 |
| Person centredness                       |                           |                             |                              |                            |                              |                           |                           |                                  |                                  |                           |                                      |                                 |
| Whole person care                        |                           |                             |                              | X                          |                              |                           |                           |                                  | X                                |                           |                                      | X                               |

1  
2  
3  
4  
5  
6  
7  
8  
9  
10  
11  
12  
13  
14  
15  
16  
17  
18  
19  
20  
21  
22  
23  
24  
25  
26  
27  
28  
29  
30  
31  
32  
33  
34  
35  
36  
37  
38  
39  
40  
41  
42  
43  
44  
45  
46  
47

| Author                                   | Hartman et al <sup>120</sup> | Lin et al <sup>121</sup> | Moore et al <sup>122</sup> | Rodondi et al <sup>123</sup> | Rueda-Clausen et al <sup>124</sup> | Schuster et al <sup>125</sup> | Yank et al <sup>126</sup> | Goodyear-Smith et al <sup>127</sup> | Jay et al <sup>128</sup> | Wadden et al <sup>129</sup> |
|------------------------------------------|------------------------------|--------------------------|----------------------------|------------------------------|------------------------------------|-------------------------------|---------------------------|-------------------------------------|--------------------------|-----------------------------|
| Name of intervention                     | NA                           | NA                       | NA                         | NA                           | NA                                 | NA                            | NA                        | NA                                  | NA                       | NA                          |
| Number of papers                         | 1                            | 1                        | 1                          | 1                            | 1                                  | 1                             | 1                         | 1                                   | 1                        | 1                           |
| Country                                  | USA                          | USA                      | UK                         | Switzerland                  | Canada                             | USA                           | USA                       | New Zealand                         | USA                      | USA                         |
| Year                                     | 2014                         | 2015                     | 2003                       | 2006                         | 2014                               | 2008                          | 2013                      | 2014                                | 2013                     | 1997                        |
| Design                                   | RCT (protocol)               | RCT                      | RCT                        | Cohort study                 | Single arm trial                   | Single arm trial              | RCT                       | RCT                                 | RCT                      | RCT                         |
| Diagnosis                                | X                            |                          | X                          | X                            |                                    | X                             |                           | X                                   | X                        | X                           |
| Recruitment into the trial               | X                            |                          |                            |                              |                                    |                               |                           | X                                   |                          | X                           |
| Co-ordination                            | X                            |                          |                            |                              | X                                  | X                             |                           |                                     | X                        |                             |
| Weight and height                        | X                            |                          |                            | X                            |                                    | X                             |                           | X                                   | X                        |                             |
| Waist circumference                      | X                            |                          |                            |                              |                                    |                               |                           |                                     |                          |                             |
| System level/implementation              |                              |                          |                            |                              |                                    | X                             |                           |                                     |                          |                             |
| Doctor-patient relationship              |                              |                          |                            | X                            | X                                  |                               |                           |                                     |                          |                             |
| Public health role                       |                              |                          |                            |                              |                                    | X                             |                           |                                     |                          |                             |
| Prevention                               |                              |                          |                            |                              |                                    |                               |                           |                                     |                          |                             |
| Nutrition education                      |                              |                          | X                          | X                            |                                    | X                             |                           |                                     | X                        |                             |
| Physical activity education              |                              |                          | X                          | X                            |                                    | X                             |                           |                                     | X                        |                             |
| Behaviour modification                   |                              |                          | X                          | X                            |                                    | X                             |                           |                                     | X                        |                             |
| Counselling/psychology                   |                              |                          |                            |                              |                                    |                               |                           |                                     |                          |                             |
| Role modelling                           |                              |                          |                            |                              |                                    |                               |                           |                                     |                          |                             |
| Group based interventions                |                              |                          |                            |                              |                                    |                               |                           |                                     |                          |                             |
| Medications                              |                              |                          |                            |                              |                                    |                               |                           |                                     |                          |                             |
| Bariatric surgery referral               |                              |                          |                            |                              |                                    |                               |                           |                                     |                          |                             |
| Bariatric surgery work-up                |                              |                          |                            |                              |                                    |                               |                           |                                     |                          |                             |
| Bariatric surgery after care             |                              |                          |                            |                              |                                    |                               |                           |                                     |                          |                             |
| Commercial weight loss program referral  |                              |                          |                            |                              |                                    |                               |                           |                                     |                          |                             |
| Bariatric equipment in consultation room |                              |                          |                            |                              |                                    |                               |                           |                                     |                          |                             |
| Standard care undefined                  |                              |                          | X                          |                              | X                                  |                               | X                         | X                                   |                          |                             |
| Standard care was used                   |                              |                          | X                          |                              | X                                  |                               | X                         | X                                   |                          |                             |
| Exact role uncertain                     |                              |                          | X                          |                              | X                                  |                               |                           |                                     |                          |                             |
| Person centredness                       |                              |                          |                            |                              |                                    |                               |                           |                                     |                          |                             |
| Whole person care                        |                              |                          |                            |                              |                                    |                               |                           |                                     |                          |                             |

**TABLE 3: Clinical overviews and opinion articles on the role of the family doctor in the management of adult obesity in primary care (over 7 pages)**

| Author                                   | Anderson, Wadden <sup>130</sup>                                   | Rao <sup>131</sup>                                    | Simkin-Silverman et al <sup>132</sup>          | Logue, Smucker <sup>133</sup>                               | Lyznicki et al <sup>134</sup>                      | Sherman et al <sup>135</sup>                          | Vallis et al <sup>136</sup>                                   | Benotti <sup>137</sup>                    | Brown et al <sup>138</sup>              | Choban et al <sup>139</sup>           |
|------------------------------------------|-------------------------------------------------------------------|-------------------------------------------------------|------------------------------------------------|-------------------------------------------------------------|----------------------------------------------------|-------------------------------------------------------|---------------------------------------------------------------|-------------------------------------------|-----------------------------------------|---------------------------------------|
| Title                                    | Treating the obese patient: suggestions for primary care practice | Office-based strategies for the management of obesity | Treatment of overweight and obesity in primary | Obesity management in primary care: changing the status quo | Obesity: Assessment and Management in Primary Care | Health coaching integration into primary care for the | Modified 5 As: Minimal intervention for obesity counseling in | Patient preparation for bariatric surgery | Laparoscopic adjustable gastric banding | Bariatric surgery for morbid obesity: |
| Country                                  | USA                                                               | USA                                                   | USA                                            | USA                                                         | USA                                                | USA                                                   | Canada                                                        | USA                                       | Australia                               | USA                                   |
| Year                                     | 1999                                                              | 2010                                                  | 2008                                           | 2001                                                        | 2001                                               | 2013                                                  | 2013                                                          | 2014                                      | 2009                                    | 2002                                  |
| Overview/opinion                         | Overview                                                          | Overview                                              | Overview                                       | Editorial                                                   | Overview                                           | Opinion                                               | Overview                                                      | Overview (bariatric)                      | Overview (bariatric)                    | Overview (bariatric)                  |
| Diagnosis                                | X                                                                 | X                                                     | X                                              | X                                                           | X                                                  | X                                                     | X                                                             | X                                         | X                                       | X                                     |
| Co-ordination                            | X                                                                 | X                                                     | X                                              |                                                             | X                                                  | X                                                     | X                                                             |                                           | X                                       | X                                     |
| Weight and height                        | X                                                                 | X                                                     |                                                | X                                                           | X                                                  |                                                       | X                                                             | X                                         |                                         |                                       |
| Waist circumference                      |                                                                   | X                                                     |                                                |                                                             | X                                                  |                                                       | X                                                             | X                                         |                                         |                                       |
| System level/implementation              |                                                                   |                                                       |                                                |                                                             |                                                    |                                                       |                                                               |                                           |                                         |                                       |
| Doctor-patient relationship              |                                                                   |                                                       |                                                |                                                             |                                                    |                                                       |                                                               |                                           |                                         |                                       |
| Public health role                       |                                                                   |                                                       |                                                |                                                             |                                                    |                                                       |                                                               |                                           |                                         |                                       |
| Prevention                               |                                                                   |                                                       |                                                |                                                             |                                                    |                                                       |                                                               |                                           |                                         |                                       |
| Nutrition education                      | X                                                                 | X                                                     | X                                              | X                                                           |                                                    |                                                       | X                                                             |                                           |                                         | X                                     |
| Physical activity education              | X                                                                 | X                                                     |                                                | X                                                           |                                                    |                                                       | X                                                             |                                           |                                         |                                       |
| Behaviour modification                   | X                                                                 | X                                                     |                                                | X                                                           |                                                    |                                                       | X                                                             |                                           |                                         |                                       |
| Counselling/psychology                   |                                                                   |                                                       |                                                |                                                             |                                                    |                                                       | X                                                             |                                           |                                         |                                       |
| Role modelling                           |                                                                   |                                                       |                                                |                                                             | X                                                  |                                                       |                                                               |                                           |                                         |                                       |
| Group based interventions                |                                                                   |                                                       |                                                |                                                             |                                                    |                                                       |                                                               |                                           |                                         |                                       |
| Medications                              | X                                                                 | X                                                     |                                                | X                                                           | X                                                  |                                                       |                                                               |                                           |                                         |                                       |
| Bariatric surgery referral               | X                                                                 | X                                                     |                                                |                                                             | X                                                  |                                                       |                                                               | X                                         | X                                       | X                                     |
| Bariatric surgery work-up                |                                                                   |                                                       |                                                |                                                             |                                                    |                                                       |                                                               | X                                         |                                         |                                       |
| Bariatric surgery after care             |                                                                   |                                                       |                                                |                                                             |                                                    |                                                       |                                                               |                                           |                                         | X                                     |
| Commercial weight loss program referral  | X                                                                 | X                                                     |                                                |                                                             |                                                    |                                                       |                                                               |                                           |                                         |                                       |
| Bariatric equipment in consultation room |                                                                   |                                                       |                                                |                                                             |                                                    |                                                       |                                                               |                                           |                                         |                                       |
| Standard care undefined                  |                                                                   |                                                       |                                                |                                                             |                                                    |                                                       |                                                               |                                           |                                         |                                       |
| Exact role uncertain                     |                                                                   |                                                       | X                                              |                                                             |                                                    |                                                       |                                                               |                                           | X                                       |                                       |
| Person centredness                       |                                                                   |                                                       |                                                | X                                                           |                                                    |                                                       | X                                                             |                                           |                                         |                                       |
| Whole person care                        |                                                                   |                                                       |                                                | X                                                           | X                                                  |                                                       | X                                                             | X                                         |                                         |                                       |

1  
2  
3  
4  
5  
6  
7  
8  
9  
10  
11  
12  
13  
14  
15  
16  
17  
18  
19  
20  
21  
22  
23  
24  
25  
26  
27  
28  
29  
30  
31  
32  
33  
34  
35  
36  
37  
38  
39  
40  
41  
42  
43  
44  
45  
46  
47

|                                          |                                      |                                                                   |                                                            |                              |                                                  |                                   |                                                              |                                                             |                                                          |                                     |                                              |
|------------------------------------------|--------------------------------------|-------------------------------------------------------------------|------------------------------------------------------------|------------------------------|--------------------------------------------------|-----------------------------------|--------------------------------------------------------------|-------------------------------------------------------------|----------------------------------------------------------|-------------------------------------|----------------------------------------------|
| Author                                   | DeMaria <sup>140</sup>               | Dixon <sup>141</sup>                                              | Heber et al <sup>142</sup>                                 | Karmali et al <sup>143</sup> | Pietras et al <sup>144</sup>                     | Richardson <sup>145</sup>         | Shafipour et al <sup>146</sup>                               | Snow et al <sup>147</sup>                                   | Van Sickle <sup>148</sup>                                | Virji et al <sup>149</sup>          | Wilbert et al <sup>150</sup>                 |
| Title                                    | Bariatric surgery for morbid obesity | Referral for a bariatric surgical consultation: it is time to act | Endocrine and nutritional management of the post-bariatric | Bariatric surgery: a primer  | Preoperative and postoperative management of the | Bariatric society is here to help | What do I do with my morbidly obese patient? A detailed case | Pharmacologic and surgical management of obesity in primary | Management of the Challenging Bariatric Surgical Patient | Caring for patients after bariatric | Appetite suppressants as adjuncts for weight |
| Country                                  | USA                                  | Australia                                                         | USA                                                        | Canada                       | USA                                              | USA                               | USA                                                          | USA                                                         | USA                                                      | USA                                 | USA                                          |
| Year                                     | 2007                                 | 2009                                                              | 2010                                                       | 2010                         | 2007                                             | 2010                              | 2009                                                         | 2005                                                        | 2007                                                     | 2006                                | 2011                                         |
| Overview/opinion                         | Overview                             | Opinion                                                           | Expert opinion                                             | Overview                     | Overview                                         | Single opinion                    | Overview                                                     | Expert opinion                                              | Overview                                                 | Overview                            | Overview                                     |
| Diagnosis                                | X                                    | X                                                                 |                                                            | X                            |                                                  | X                                 | X                                                            | X                                                           | X                                                        |                                     | X                                            |
| Co-ordination                            | X                                    | X                                                                 |                                                            | X                            |                                                  | X                                 | X                                                            | X                                                           | X                                                        |                                     |                                              |
| Weight and height                        |                                      |                                                                   |                                                            |                              |                                                  | X                                 | X                                                            | X                                                           | X                                                        |                                     | X                                            |
| Waist circumference                      |                                      |                                                                   |                                                            |                              |                                                  |                                   |                                                              |                                                             |                                                          |                                     |                                              |
| System level/implementation              |                                      |                                                                   |                                                            |                              |                                                  |                                   |                                                              |                                                             |                                                          |                                     |                                              |
| Doctor-patient relationship              |                                      |                                                                   |                                                            |                              |                                                  |                                   |                                                              |                                                             |                                                          |                                     |                                              |
| Public health role                       |                                      |                                                                   |                                                            |                              |                                                  |                                   |                                                              |                                                             |                                                          |                                     |                                              |
| Prevention                               |                                      |                                                                   |                                                            |                              |                                                  |                                   |                                                              |                                                             |                                                          |                                     |                                              |
| Nutrition education                      |                                      |                                                                   |                                                            |                              |                                                  |                                   | X                                                            | X                                                           |                                                          |                                     | X                                            |
| Physical activity education              |                                      |                                                                   |                                                            |                              |                                                  |                                   |                                                              | X                                                           |                                                          |                                     | X                                            |
| Behaviour modification                   |                                      |                                                                   |                                                            |                              |                                                  |                                   |                                                              | X                                                           |                                                          |                                     |                                              |
| Counselling/psychology                   |                                      |                                                                   |                                                            |                              |                                                  |                                   | X                                                            |                                                             |                                                          |                                     |                                              |
| Role modelling                           |                                      |                                                                   |                                                            |                              |                                                  |                                   |                                                              |                                                             |                                                          |                                     |                                              |
| Group based interventions                |                                      |                                                                   |                                                            |                              |                                                  |                                   |                                                              |                                                             |                                                          |                                     |                                              |
| Medications                              |                                      |                                                                   |                                                            |                              |                                                  |                                   |                                                              | X                                                           |                                                          |                                     | X                                            |
| Bariatric surgery referral               | X                                    | X                                                                 |                                                            | X                            | X                                                | X                                 | X                                                            | X                                                           | X                                                        | X                                   |                                              |
| Bariatric surgery work-up                | X                                    |                                                                   |                                                            | X                            |                                                  |                                   |                                                              |                                                             |                                                          |                                     |                                              |
| Bariatric surgery after care             | X                                    |                                                                   | X                                                          | X                            | X                                                |                                   | X                                                            |                                                             | X                                                        | X                                   |                                              |
| Commercial weight loss program referral  |                                      |                                                                   |                                                            |                              |                                                  |                                   |                                                              |                                                             |                                                          |                                     |                                              |
| Bariatric equipment in consultation room |                                      |                                                                   |                                                            |                              |                                                  |                                   |                                                              |                                                             |                                                          |                                     |                                              |
| Standard care undefined                  |                                      |                                                                   |                                                            |                              |                                                  |                                   |                                                              |                                                             |                                                          |                                     |                                              |
| Exact role uncertain                     | X                                    |                                                                   |                                                            |                              |                                                  |                                   |                                                              |                                                             |                                                          | X                                   |                                              |
| Person centredness                       |                                      |                                                                   |                                                            |                              |                                                  |                                   |                                                              |                                                             | X                                                        |                                     |                                              |
| Whole person care                        |                                      |                                                                   |                                                            |                              |                                                  |                                   | X                                                            | X                                                           |                                                          |                                     |                                              |

|        |                             |                       |                       |                              |                              |                         |                               |                                 |                          |                        |                                  |
|--------|-----------------------------|-----------------------|-----------------------|------------------------------|------------------------------|-------------------------|-------------------------------|---------------------------------|--------------------------|------------------------|----------------------------------|
| Author | Kolasa et al <sup>151</sup> | Mercer <sup>152</sup> | UK Health Development | Agrawal et al <sup>154</sup> | Brunton et al <sup>155</sup> | Bartlett <sup>156</sup> | Benjamin et al <sup>157</sup> | Birmingham et al <sup>158</sup> | Caulfield <sup>159</sup> | Cervený <sup>160</sup> | Fitzpatrick et al <sup>161</sup> |
|--------|-----------------------------|-----------------------|-----------------------|------------------------------|------------------------------|-------------------------|-------------------------------|---------------------------------|--------------------------|------------------------|----------------------------------|

| Title                                    | Weight loss strategies that really work | How useful are clinical guidelines for the management of obesity | Agency <sup>153</sup><br>Care pathways for the prevention and management | Managing obesity like any other chronic condition. | Management of Obesity in Adults | Motivating patients toward weight loss: practical | Can primary care physician-driven community | The management of adult obesity | Obesity, legal duties, and the family | Approaching the obese patients in primary health care | An Evidence-Based Guide for Obesity Treatment in Primary Care |
|------------------------------------------|-----------------------------------------|------------------------------------------------------------------|--------------------------------------------------------------------------|----------------------------------------------------|---------------------------------|---------------------------------------------------|---------------------------------------------|---------------------------------|---------------------------------------|-------------------------------------------------------|---------------------------------------------------------------|
| Country                                  | USA                                     | UK                                                               | UK                                                                       | USA                                                | USA                             | USA                                               | USA                                         | Canada                          | Canada                                | Czech Republic                                        | USA                                                           |
| Year                                     | 2010                                    | 2009                                                             | 2004                                                                     | 2000                                               | 2014                            | 2003                                              | 2013                                        | 2003                            | 2007                                  | 2007                                                  | 2015                                                          |
| Overview/opinion                         | Overview                                | Guideline summary                                                | Draft clinical pathway                                                   | Overview                                           | Overview                        | Overview                                          | Editorial overview                          | Overview                        | Legal overview                        | Overview                                              | Overview                                                      |
| Diagnosis                                | X                                       | X                                                                |                                                                          |                                                    | X                               | X                                                 | X                                           | X                               | X                                     | X                                                     | X                                                             |
| Co-ordination                            | X                                       | X                                                                | X                                                                        |                                                    | X                               | X                                                 | X                                           | X                               | X                                     | X                                                     | X                                                             |
| Weight and height                        | X                                       | X                                                                |                                                                          |                                                    | X                               | X                                                 |                                             | X                               |                                       | X                                                     | X                                                             |
| Waist circumference                      | X                                       | X                                                                |                                                                          |                                                    | X                               | X                                                 |                                             | X                               |                                       | X                                                     | X                                                             |
| System level/implementation              |                                         | X                                                                |                                                                          |                                                    |                                 |                                                   | X                                           |                                 |                                       |                                                       |                                                               |
| Doctor-patient relationship              |                                         | X                                                                |                                                                          | X                                                  | X                               | X                                                 |                                             |                                 | X                                     | X                                                     | X                                                             |
| Public health role                       |                                         | X                                                                |                                                                          |                                                    |                                 |                                                   | X                                           |                                 |                                       |                                                       |                                                               |
| Prevention                               |                                         | X                                                                |                                                                          |                                                    |                                 |                                                   | X                                           | X                               |                                       | X                                                     |                                                               |
| Nutrition education                      | X                                       | X                                                                | X                                                                        |                                                    | X                               | X                                                 |                                             |                                 |                                       | X                                                     | X                                                             |
| Physical activity education              | X                                       | X                                                                |                                                                          |                                                    | X                               | X                                                 |                                             |                                 |                                       | X                                                     | X                                                             |
| Behaviour modification                   | X                                       | X                                                                | X                                                                        |                                                    | X                               | X                                                 |                                             |                                 |                                       | X                                                     | X                                                             |
| Counselling/psychology                   | X                                       |                                                                  | X                                                                        |                                                    | X                               | X                                                 |                                             |                                 |                                       |                                                       |                                                               |
| Role modelling                           |                                         |                                                                  |                                                                          |                                                    |                                 |                                                   |                                             |                                 |                                       |                                                       |                                                               |
| Group based interventions                |                                         |                                                                  |                                                                          |                                                    |                                 |                                                   |                                             |                                 |                                       |                                                       |                                                               |
| Medications                              | X                                       | X                                                                |                                                                          | X                                                  | X                               | X                                                 |                                             | X                               |                                       | X                                                     |                                                               |
| Bariatric surgery referral               | X                                       | X                                                                |                                                                          |                                                    | X                               | X                                                 |                                             | X                               |                                       |                                                       |                                                               |
| Bariatric surgery work-up                |                                         |                                                                  |                                                                          |                                                    |                                 |                                                   |                                             |                                 |                                       |                                                       |                                                               |
| Bariatric surgery after care             |                                         |                                                                  |                                                                          |                                                    |                                 |                                                   |                                             |                                 |                                       |                                                       |                                                               |
| Commercial weight loss program referral  |                                         |                                                                  |                                                                          |                                                    |                                 |                                                   |                                             |                                 |                                       |                                                       |                                                               |
| Bariatric equipment in consultation room |                                         |                                                                  |                                                                          |                                                    |                                 |                                                   |                                             |                                 |                                       |                                                       |                                                               |
| Standard care undefined                  |                                         |                                                                  |                                                                          |                                                    |                                 |                                                   |                                             |                                 |                                       |                                                       |                                                               |
| Exact role uncertain                     |                                         |                                                                  |                                                                          |                                                    |                                 |                                                   |                                             |                                 |                                       |                                                       |                                                               |
| Person centredness                       |                                         | X                                                                |                                                                          |                                                    | X                               | X                                                 |                                             | X                               | X                                     | X                                                     | X                                                             |
| Whole person care                        |                                         | X                                                                |                                                                          |                                                    | X                               | X                                                 |                                             | X                               |                                       | X                                                     | X                                                             |

| Author                                   | Frank <sup>162</sup>                               | Gandjour <sup>163</sup>                                    | Grief <sup>164</sup>                                           | Grima and Dixon <sup>165</sup>                                   | Hagaman <sup>166</sup>                | Hill <sup>167</sup>                       | Hill and Wyatt <sup>168</sup>                                | Iacobucci <sup>169</sup>                              | Kausman and Bruere <sup>170</sup> | Kolasa <sup>171</sup>                                 |
|------------------------------------------|----------------------------------------------------|------------------------------------------------------------|----------------------------------------------------------------|------------------------------------------------------------------|---------------------------------------|-------------------------------------------|--------------------------------------------------------------|-------------------------------------------------------|-----------------------------------|-------------------------------------------------------|
| Title                                    | A multidisciplinary approach to obesity management | Development process of an evidence-based guideline for the | Strategies to facilitate weight loss in patients who are obese | Obesity-- recommendations for management in general practice and | FP's patients are successful "losers" | Dealing with obesity as a chronic disease | Outpatient management of obesity: a primary care perspective | Pay GPs to tackle obesity, doctors urge UK government | If not dieting, now what?         | Summary of clinical guidelines on the identification, |
| Country                                  | USA                                                | Germany                                                    | USA                                                            | Australia                                                        | USA                                   | USA                                       | USA                                                          | UK                                                    | Australia                         | USA                                                   |
| Year                                     | 1998                                               | 2001                                                       | 2010                                                           | 2013                                                             | 2010                                  | 1998                                      | 2002                                                         | 2014                                                  | 2006                              | 1999                                                  |
| Overview/opinion                         | Overview                                           | Overview                                                   | Single opinion                                                 | Overview                                                         | Single opinion                        | Overview                                  | Overview                                                     | Single opinion                                        | Overview                          | Overview                                              |
| Diagnosis                                | X                                                  | X                                                          | X                                                              | X                                                                | X                                     | X                                         | X                                                            | X                                                     | X                                 | X                                                     |
| Co-ordination                            | X                                                  | X                                                          | X                                                              | X                                                                | X                                     | X                                         | X                                                            | X                                                     | X                                 | X                                                     |
| Weight and height                        |                                                    | X                                                          | X                                                              | X                                                                |                                       | X                                         | X                                                            | X                                                     |                                   | X                                                     |
| Waist circumference                      |                                                    |                                                            | X                                                              | X                                                                |                                       | X                                         | X                                                            | X                                                     |                                   | X                                                     |
| System level/implementation              |                                                    |                                                            |                                                                |                                                                  |                                       |                                           |                                                              | X                                                     |                                   |                                                       |
| Doctor-patient relationship              |                                                    |                                                            |                                                                | X                                                                | X                                     |                                           | X                                                            |                                                       | X                                 | X                                                     |
| Public health role                       |                                                    |                                                            |                                                                |                                                                  |                                       |                                           |                                                              | X                                                     |                                   |                                                       |
| Prevention                               |                                                    |                                                            |                                                                |                                                                  |                                       |                                           |                                                              |                                                       |                                   |                                                       |
| Nutrition education                      |                                                    |                                                            |                                                                | X                                                                |                                       |                                           | X                                                            |                                                       | X                                 |                                                       |
| Physical activity education              |                                                    |                                                            |                                                                | X                                                                |                                       |                                           | X                                                            |                                                       |                                   |                                                       |
| Behaviour modification                   |                                                    |                                                            | X                                                              | X                                                                |                                       |                                           | X                                                            |                                                       | X                                 |                                                       |
| Counselling/psychology                   |                                                    |                                                            |                                                                | X                                                                |                                       |                                           | X                                                            |                                                       | X                                 |                                                       |
| Role modelling                           |                                                    |                                                            |                                                                |                                                                  | X                                     |                                           |                                                              |                                                       |                                   |                                                       |
| Group based interventions                |                                                    |                                                            | X                                                              |                                                                  |                                       |                                           |                                                              |                                                       |                                   |                                                       |
| Medications                              | X                                                  | X                                                          |                                                                | X                                                                |                                       |                                           | X                                                            |                                                       |                                   |                                                       |
| Bariatric surgery referral               | X                                                  | X                                                          |                                                                | X                                                                |                                       |                                           | X                                                            | X                                                     |                                   |                                                       |
| Bariatric surgery work-up                |                                                    |                                                            |                                                                |                                                                  |                                       |                                           |                                                              |                                                       |                                   |                                                       |
| Bariatric surgery after care             |                                                    |                                                            |                                                                |                                                                  |                                       |                                           |                                                              |                                                       |                                   |                                                       |
| Commercial weight loss program referral  |                                                    |                                                            |                                                                |                                                                  |                                       |                                           |                                                              |                                                       |                                   |                                                       |
| Bariatric equipment in consultation room |                                                    |                                                            |                                                                |                                                                  |                                       |                                           | X                                                            |                                                       |                                   |                                                       |
| Standard care undefined                  |                                                    |                                                            |                                                                |                                                                  |                                       |                                           |                                                              | X                                                     |                                   |                                                       |
| Exact role uncertain                     |                                                    | X                                                          |                                                                |                                                                  |                                       |                                           |                                                              |                                                       |                                   | X                                                     |
| Person centredness                       |                                                    |                                                            | X                                                              |                                                                  | X                                     |                                           | X                                                            |                                                       | X                                 | X                                                     |
| Whole person care                        |                                                    |                                                            |                                                                | X                                                                | X                                     |                                           | X                                                            |                                                       |                                   |                                                       |

| Author                                   | Kushner <sup>172</sup>                                 | Landau and Moulton <sup>173</sup>                 | Lenfant <sup>174</sup>                                                                  | Maryon-Davis <sup>175</sup>                                           | Mogul <sup>176</sup>                                            | Newton et al <sup>177</sup>                                      | Nichols and Bazemore <sup>178</sup>                   | Nonas <sup>179</sup>                                          | Orzano and Scott <sup>180</sup>                          | Ossolinski et al <sup>181</sup>                          |
|------------------------------------------|--------------------------------------------------------|---------------------------------------------------|-----------------------------------------------------------------------------------------|-----------------------------------------------------------------------|-----------------------------------------------------------------|------------------------------------------------------------------|-------------------------------------------------------|---------------------------------------------------------------|----------------------------------------------------------|----------------------------------------------------------|
| Title                                    | Tackling obesity: is primary care up to the challenge? | General principles in the primary care of obesity | Physicians need practical tools to treat the complex problems of overweight and obesity | Weight management in primary care: How can it be made more effective? | New Perspectives on Diagnosis and Treatment of Obesity Winnable | Supporting behavior change in overweight patients: A guide for t | Winnable battles: Family physicians play an essential | A model for chronic care of obesity through dietary treatment | Diagnosis and treatment of obesity in adults: an applied | Weight management practices and evidence for weight loss |
| Country                                  | USA                                                    | USA                                               | USA                                                                                     | UK                                                                    | USA                                                             | USA                                                              | USA                                                   | USA                                                           | USA                                                      | Australia                                                |
| Year                                     | 2010                                                   | 1992                                              | 2001                                                                                    | 2005                                                                  | 1999                                                            | 2008                                                             | 2014                                                  | 1998                                                          | 2004                                                     | 2015                                                     |
| Overview/opinion                         | Editorial                                              | Overview                                          | Editorial                                                                               | Overview                                                              | Overview                                                        | Overview                                                         | Editorial                                             | Overview                                                      | Overview                                                 | Overview                                                 |
| Diagnosis                                | X                                                      | X                                                 | X                                                                                       | X                                                                     | X                                                               | X                                                                | X                                                     | X                                                             | X                                                        | X                                                        |
| Co-ordination                            | X                                                      |                                                   |                                                                                         | X                                                                     |                                                                 | X                                                                | X                                                     | X                                                             | X                                                        | X                                                        |
| Weight and height                        | X                                                      |                                                   | X                                                                                       |                                                                       | X                                                               |                                                                  |                                                       |                                                               | X                                                        | X                                                        |
| Waist circumference                      |                                                        |                                                   | X                                                                                       |                                                                       | X                                                               |                                                                  |                                                       |                                                               |                                                          | X                                                        |
| System level/implementation              | X                                                      |                                                   |                                                                                         |                                                                       |                                                                 |                                                                  | X                                                     |                                                               |                                                          |                                                          |
| Doctor-patient relationship              |                                                        | X                                                 | X                                                                                       |                                                                       |                                                                 | X                                                                |                                                       |                                                               | X                                                        |                                                          |
| Public health role                       | X                                                      |                                                   |                                                                                         |                                                                       |                                                                 |                                                                  | X                                                     |                                                               |                                                          |                                                          |
| Prevention                               | X                                                      |                                                   |                                                                                         |                                                                       |                                                                 |                                                                  |                                                       |                                                               |                                                          |                                                          |
| Nutrition education                      | X                                                      | X                                                 | X                                                                                       | X                                                                     | X                                                               | X                                                                |                                                       |                                                               | X                                                        | X                                                        |
| Physical activity education              | X                                                      | X                                                 | X                                                                                       | X                                                                     | X                                                               | X                                                                |                                                       |                                                               | X                                                        | X                                                        |
| Behaviour modification                   | X                                                      | X                                                 | X                                                                                       |                                                                       | X                                                               | X                                                                |                                                       | X                                                             | X                                                        |                                                          |
| Counselling/psychology                   | X                                                      | X                                                 |                                                                                         |                                                                       |                                                                 | X                                                                |                                                       |                                                               |                                                          |                                                          |
| Role modelling                           |                                                        |                                                   |                                                                                         |                                                                       |                                                                 |                                                                  |                                                       |                                                               |                                                          |                                                          |
| Group based interventions                | X                                                      |                                                   |                                                                                         |                                                                       |                                                                 |                                                                  |                                                       |                                                               |                                                          |                                                          |
| Medications                              | X                                                      | X                                                 | X                                                                                       | X                                                                     | X                                                               | X                                                                |                                                       | X                                                             | X                                                        | X                                                        |
| Bariatric surgery referral               |                                                        | X                                                 | X                                                                                       | X                                                                     | X                                                               | X                                                                |                                                       |                                                               | X                                                        | X                                                        |
| Bariatric surgery work-up                |                                                        |                                                   |                                                                                         |                                                                       |                                                                 |                                                                  |                                                       |                                                               |                                                          |                                                          |
| Bariatric surgery after care             |                                                        |                                                   |                                                                                         |                                                                       |                                                                 |                                                                  |                                                       |                                                               |                                                          |                                                          |
| Commercial weight loss program referral  |                                                        |                                                   |                                                                                         | X                                                                     |                                                                 |                                                                  |                                                       |                                                               |                                                          | X                                                        |
| Bariatric equipment in consultation room |                                                        |                                                   |                                                                                         |                                                                       |                                                                 |                                                                  |                                                       |                                                               |                                                          |                                                          |
| Standard care undefined                  | X                                                      |                                                   |                                                                                         |                                                                       |                                                                 |                                                                  |                                                       |                                                               |                                                          | X                                                        |
| Exact role uncertain                     |                                                        |                                                   |                                                                                         |                                                                       | X                                                               |                                                                  | X                                                     |                                                               |                                                          |                                                          |
| Person centredness                       |                                                        | X                                                 | X                                                                                       |                                                                       |                                                                 | X                                                                | X                                                     | X                                                             | X                                                        |                                                          |
| Whole person care                        |                                                        | X                                                 | X                                                                                       |                                                                       |                                                                 |                                                                  | X                                                     | X                                                             | X                                                        |                                                          |



| Author                                   | Plourde et al <sup>182</sup>               | Rao et al <sup>183</sup>                               | Robinson et al <sup>184</sup>                             | Ruser et al <sup>185</sup>                                | Scherger <sup>186</sup>                                                 | Schlair et al <sup>187</sup>                                   | Spira <sup>188</sup>                 | Thompson et al <sup>189</sup> | Tsai et al <sup>190</sup> |
|------------------------------------------|--------------------------------------------|--------------------------------------------------------|-----------------------------------------------------------|-----------------------------------------------------------|-------------------------------------------------------------------------|----------------------------------------------------------------|--------------------------------------|-------------------------------|---------------------------|
| Title                                    | Managing obesity in adults in primary care | New and emerging weight management strategies for busy | Obesity: a move from traditional to more patient-oriented | Whittling away at obesity and overweight: Small lifestyle | Primary care physicians: On the front line in the fight against obesity | How to deliver high-quality obesity counseling in primary care | Managing obesity in general practice | Treatment of obesity          | Obesity                   |
| Country                                  | Canada                                     | USA                                                    | USA                                                       | USA                                                       | USA                                                                     | USA                                                            | UK                                   | USA                           | USA                       |
| Year                                     | 2012                                       | 2011                                                   | 1995                                                      | 2005                                                      | 1999                                                                    | 2012                                                           | 1983                                 | 2007                          | 2010                      |
| Overview/opinion                         | Overview                                   | Overview                                               | Overview                                                  | Overview                                                  | Overview                                                                | Overview                                                       | Single opinion                       | Overview                      | Overview                  |
| Diagnosis                                | X                                          | X                                                      | X                                                         | X                                                         | X                                                                       | X                                                              | X                                    | X                             | X                         |
| Co-ordination                            | X                                          | X                                                      |                                                           | X                                                         | X                                                                       |                                                                |                                      |                               | X                         |
| Weight and height                        | X                                          |                                                        |                                                           | X                                                         | X                                                                       | X                                                              |                                      | X                             | X                         |
| Waist circumference                      | X                                          |                                                        |                                                           | X                                                         | X                                                                       | X                                                              |                                      | X                             | X                         |
| System level/implementation              |                                            |                                                        |                                                           |                                                           |                                                                         |                                                                |                                      |                               |                           |
| Doctor-patient relationship              |                                            |                                                        | X                                                         |                                                           |                                                                         |                                                                | X                                    |                               | X                         |
| Public health role                       |                                            |                                                        |                                                           |                                                           |                                                                         |                                                                |                                      |                               | X                         |
| Prevention                               |                                            |                                                        |                                                           | X                                                         |                                                                         |                                                                |                                      |                               |                           |
| Nutrition education                      | X                                          |                                                        | X                                                         | X                                                         | X                                                                       | X                                                              | X                                    | X                             | X                         |
| Physical activity education              | X                                          |                                                        | X                                                         | X                                                         | X                                                                       | X                                                              | X                                    | X                             | X                         |
| Behaviour modification                   | X                                          |                                                        |                                                           | X                                                         | X                                                                       | X                                                              | X                                    | X                             | X                         |
| Counselling/psychology                   | X                                          |                                                        | X                                                         |                                                           |                                                                         | X                                                              |                                      |                               | X                         |
| Role modelling                           |                                            |                                                        |                                                           |                                                           |                                                                         |                                                                |                                      |                               |                           |
| Group based interventions                |                                            |                                                        |                                                           |                                                           |                                                                         | X                                                              |                                      |                               |                           |
| Medications                              | X                                          | X                                                      |                                                           | X                                                         | X                                                                       | X                                                              | X                                    | X                             | X                         |
| Bariatric surgery referral               | X                                          |                                                        | X                                                         | X                                                         |                                                                         | X                                                              | X                                    | X                             |                           |
| Bariatric surgery work-up                |                                            |                                                        |                                                           |                                                           |                                                                         |                                                                |                                      |                               |                           |
| Bariatric surgery after care             |                                            |                                                        |                                                           |                                                           |                                                                         |                                                                |                                      |                               |                           |
| Commercial weight loss program referral  |                                            |                                                        |                                                           |                                                           |                                                                         |                                                                | X                                    |                               |                           |
| Bariatric equipment in consultation room |                                            |                                                        |                                                           |                                                           |                                                                         |                                                                |                                      |                               |                           |
| Standard care undefined                  |                                            |                                                        |                                                           |                                                           |                                                                         |                                                                |                                      |                               |                           |
| Exact role uncertain                     |                                            | X                                                      |                                                           |                                                           |                                                                         |                                                                |                                      |                               |                           |
| Person centredness                       |                                            |                                                        | X                                                         |                                                           |                                                                         | X                                                              |                                      |                               |                           |
| Whole person care                        |                                            |                                                        | X                                                         |                                                           | X                                                                       |                                                                |                                      |                               | X                         |

| Author | Yanovski <sup>191</sup> | Australian Medical Association <sup>192</sup> | Zwar and Harris <sup>193</sup> | Hainer <sup>194</sup> | Seidell et al <sup>195</sup> | Anderson <sup>196</sup> | Jarvis <sup>197</sup> | Lowery <sup>198</sup> | Van Avendonk et al <sup>199</sup> | Al-Quaiz <sup>200</sup> | Carvajal et al <sup>201</sup> | Kushner and Ryan <sup>202</sup> | Obesity Australia <sup>203</sup> |
|--------|-------------------------|-----------------------------------------------|--------------------------------|-----------------------|------------------------------|-------------------------|-----------------------|-----------------------|-----------------------------------|-------------------------|-------------------------------|---------------------------------|----------------------------------|
|        |                         |                                               |                                |                       |                              |                         |                       |                       |                                   |                         |                               |                                 |                                  |

| Title                                    | A practical approach to treatment of the obese patient | Your Family Doctor – Keeping You Healthy AMA FAMILY DOCTOR | Are GPs doing enough to help patients | How should the obese patient be managed? | An integrated health care standard for | Reducing overweight and obesity: Closing the gap between | Obesity and the overworked GP | Medical home concept: Policy | Primary care and public health a natural | Current concepts in the management | Managing obesity in primary care | Assessment and lifestyle management of patients | The mission of Obesity Australia is to drive change in the public |
|------------------------------------------|--------------------------------------------------------|------------------------------------------------------------|---------------------------------------|------------------------------------------|----------------------------------------|----------------------------------------------------------|-------------------------------|------------------------------|------------------------------------------|------------------------------------|----------------------------------|-------------------------------------------------|-------------------------------------------------------------------|
| Country                                  | USA                                                    | Australia                                                  | Australia                             | Czech Republic                           | Netherlands                            | Spain                                                    | UK                            | USA                          | Netherlands                              | Saudi Arabia                       | USA                              | USA                                             | Australia                                                         |
| Year                                     | 1993                                                   | 2014                                                       | 2013                                  | 1999                                     | 2012                                   | 2008                                                     | 2006                          | 2010                         | 2012                                     | 2001                               | 2013                             | 2014                                            | 2013                                                              |
| Overview/opinion                         | Overview                                               | Media release                                              | Blog                                  | Overview                                 | Overview                               | Overview                                                 | Overview                      | Overview                     | Overview                                 | Overview                           | Overview                         | Overview                                        | Statement                                                         |
| Diagnosis                                | X                                                      | X                                                          | X                                     | X                                        | X                                      | X                                                        | X                             | X                            | X                                        | X                                  | X                                | X                                               | X                                                                 |
| Co-ordination                            | X                                                      |                                                            | X                                     | X                                        | X                                      | X                                                        | X                             | X                            | X                                        | X                                  | X                                | X                                               | X                                                                 |
| Weight and height                        | X                                                      |                                                            |                                       | X                                        | X                                      | X                                                        | X                             |                              | X                                        | X                                  | X                                | X                                               | X                                                                 |
| Waist circumference                      | X                                                      |                                                            |                                       |                                          | X                                      |                                                          | X                             |                              | X                                        | X                                  |                                  | X                                               |                                                                   |
| System level/implementation              |                                                        |                                                            |                                       |                                          |                                        | X                                                        | X                             | X                            | X                                        |                                    |                                  |                                                 |                                                                   |
| Doctor-patient relationship              | X                                                      |                                                            |                                       |                                          | X                                      |                                                          | X                             |                              | X                                        | X                                  | X                                |                                                 |                                                                   |
| Public health role                       |                                                        |                                                            |                                       |                                          |                                        | X                                                        | X                             |                              | X                                        |                                    |                                  |                                                 |                                                                   |
| Prevention                               |                                                        |                                                            |                                       |                                          | X                                      |                                                          | X                             |                              | X                                        |                                    |                                  |                                                 |                                                                   |
| Nutrition education                      | X                                                      | X                                                          |                                       | X                                        | X                                      | X                                                        | X                             |                              | X                                        | X                                  |                                  | X                                               |                                                                   |
| Physical activity education              | X                                                      | X                                                          |                                       | X                                        | X                                      | X                                                        | X                             |                              | X                                        | X                                  |                                  | X                                               |                                                                   |
| Behaviour modification                   | X                                                      |                                                            |                                       |                                          | X                                      | X                                                        | X                             |                              | X                                        | X                                  |                                  | X                                               |                                                                   |
| Counselling/psychology                   | X                                                      |                                                            |                                       |                                          |                                        |                                                          |                               |                              |                                          |                                    |                                  |                                                 |                                                                   |
| Role modelling                           |                                                        |                                                            |                                       |                                          |                                        |                                                          |                               |                              |                                          |                                    |                                  |                                                 |                                                                   |
| Group based interventions                | X                                                      |                                                            |                                       |                                          |                                        |                                                          |                               |                              |                                          |                                    |                                  |                                                 |                                                                   |
| Medications                              | X                                                      |                                                            |                                       |                                          |                                        |                                                          |                               |                              |                                          | X                                  | X                                | X                                               |                                                                   |
| Bariatric surgery referral               | X                                                      |                                                            | X                                     | X                                        |                                        |                                                          |                               |                              | X                                        | X                                  | X                                | X                                               | X                                                                 |
| Bariatric surgery work-up                |                                                        |                                                            |                                       |                                          |                                        |                                                          |                               |                              |                                          |                                    |                                  |                                                 |                                                                   |
| Bariatric surgery after care             |                                                        |                                                            |                                       |                                          |                                        |                                                          |                               |                              |                                          |                                    |                                  |                                                 |                                                                   |
| Commercial weight loss program referral  | X                                                      |                                                            |                                       |                                          |                                        |                                                          |                               |                              |                                          |                                    | X                                | X                                               | X                                                                 |
| Bariatric equipment in consultation room |                                                        |                                                            |                                       |                                          |                                        |                                                          |                               |                              |                                          |                                    |                                  |                                                 |                                                                   |
| Standard care undefined                  |                                                        |                                                            |                                       |                                          |                                        |                                                          |                               |                              |                                          |                                    |                                  |                                                 |                                                                   |
| Exact role uncertain                     |                                                        | X                                                          | X                                     |                                          | X                                      | X                                                        | X                             | X                            |                                          | X                                  | X                                | X                                               | X                                                                 |
| Person centredness                       | X                                                      |                                                            |                                       |                                          |                                        |                                                          |                               |                              | X                                        |                                    |                                  |                                                 |                                                                   |
| Whole person care                        |                                                        |                                                            |                                       |                                          |                                        | X                                                        | X                             |                              | X                                        |                                    | X                                |                                                 |                                                                   |

**TABLE 4: Current practice articles on the role of the family doctor in the management of adult obesity in primary care (over 3 pages)**

| Author | Bourn <sup>204</sup> | Alexander et al <sup>205</sup> | Alexander et al <sup>206</sup> | Klumbiene et al <sup>207</sup> | Linne et al <sup>208</sup> | Patterson et al <sup>209</sup> | Hoyt <sup>210</sup> | Fransen et al <sup>211</sup> | Cohen et al <sup>212</sup> | Fobi et al <sup>213</sup> |
|--------|----------------------|--------------------------------|--------------------------------|--------------------------------|----------------------------|--------------------------------|---------------------|------------------------------|----------------------------|---------------------------|
|        |                      |                                |                                |                                |                            |                                |                     |                              |                            |                           |

| Title                                       | Tackling Obesity in England | Do the five A's work when physicians counsel about | Weight-loss talks: what works (and what doesn't) | Advising overweight persons about diet and physical activity.in | Success rate of Orlistat in primary-care practice is limited by failure to follow prescribing | Prescribing for weight loss in primary care: Evidence | Person, place, and prevention in primary care: A multilevel | The development of a minimal intervention strategy to | Laparoscopic Roux-en-Y gastric bypass for BMI <35 kg/m <sup>2</sup> - a | Gastric bypass in patients |
|---------------------------------------------|-----------------------------|----------------------------------------------------|--------------------------------------------------|-----------------------------------------------------------------|-----------------------------------------------------------------------------------------------|-------------------------------------------------------|-------------------------------------------------------------|-------------------------------------------------------|-------------------------------------------------------------------------|----------------------------|
| Country                                     | England                     | USA                                                | USA                                              | Lithuania                                                       | Sweden                                                                                        | Northern Ireland                                      | USA                                                         | The Netherlands                                       | USA                                                                     | Brazil                     |
| Year                                        | 2001                        | 2011                                               | 2011                                             | 2006                                                            | 2003                                                                                          | 2013                                                  | 2013                                                        | 2008                                                  | 2006                                                                    | 2002                       |
| Methodology                                 | Government report           | Qualitative                                        | Qualitative                                      | Survey                                                          | Survey                                                                                        | Audit                                                 | Survey                                                      | Qualitative                                           | Audit                                                                   | Audit                      |
| Diagnosis                                   | X                           | X                                                  | X                                                |                                                                 | X                                                                                             |                                                       | X                                                           | X                                                     | X                                                                       | X                          |
| Co-ordination                               | X                           | X                                                  |                                                  |                                                                 | X                                                                                             |                                                       | X                                                           | X                                                     | X                                                                       | X                          |
| Weight and height                           |                             | X                                                  |                                                  |                                                                 | X                                                                                             |                                                       | X                                                           | X                                                     |                                                                         |                            |
| Waist circumference                         |                             |                                                    |                                                  |                                                                 |                                                                                               |                                                       |                                                             | X                                                     |                                                                         |                            |
| System level/implementation                 | X                           |                                                    |                                                  |                                                                 |                                                                                               |                                                       | X                                                           | X                                                     |                                                                         |                            |
| Doctor-patient relationship                 |                             |                                                    |                                                  |                                                                 |                                                                                               |                                                       |                                                             | X                                                     |                                                                         |                            |
| Public health prevention                    |                             |                                                    |                                                  |                                                                 |                                                                                               |                                                       | X                                                           |                                                       |                                                                         |                            |
| Nutrition education                         | X                           | X                                                  | X                                                |                                                                 | X                                                                                             |                                                       | X                                                           | X                                                     |                                                                         |                            |
| Physical activity education                 | X                           | X                                                  | X                                                |                                                                 |                                                                                               |                                                       | X                                                           | X                                                     |                                                                         |                            |
| Behaviour modification                      |                             | X                                                  |                                                  |                                                                 |                                                                                               |                                                       | X                                                           | X                                                     |                                                                         |                            |
| Counselling/psychology                      |                             |                                                    |                                                  |                                                                 |                                                                                               |                                                       | X                                                           |                                                       |                                                                         |                            |
| Role modelling                              |                             |                                                    |                                                  |                                                                 |                                                                                               |                                                       |                                                             |                                                       |                                                                         |                            |
| Group based interventions                   |                             |                                                    |                                                  |                                                                 |                                                                                               |                                                       |                                                             |                                                       |                                                                         |                            |
| Medications                                 | X                           |                                                    |                                                  |                                                                 | X                                                                                             | X                                                     |                                                             |                                                       |                                                                         |                            |
| Bariatric surgery referral                  | X                           |                                                    |                                                  |                                                                 |                                                                                               |                                                       |                                                             |                                                       | X                                                                       |                            |
| Bariatric surgery work-up                   |                             |                                                    |                                                  |                                                                 |                                                                                               |                                                       |                                                             |                                                       |                                                                         |                            |
| Bariatric surgery after care                |                             |                                                    |                                                  |                                                                 |                                                                                               |                                                       |                                                             |                                                       |                                                                         |                            |
| Commercial weight loss program referral     |                             |                                                    |                                                  |                                                                 |                                                                                               |                                                       |                                                             |                                                       |                                                                         |                            |
| Bariatric equipment in consultation room    |                             |                                                    |                                                  |                                                                 |                                                                                               |                                                       |                                                             |                                                       |                                                                         |                            |
| Standard care undefined                     |                             |                                                    |                                                  |                                                                 | X                                                                                             |                                                       |                                                             |                                                       |                                                                         |                            |
| Exact role uncertain                        | X                           |                                                    |                                                  |                                                                 |                                                                                               |                                                       | X                                                           |                                                       |                                                                         |                            |
| Person centredness                          |                             |                                                    |                                                  |                                                                 |                                                                                               |                                                       |                                                             | X                                                     |                                                                         |                            |
| Whole person care                           |                             |                                                    |                                                  |                                                                 |                                                                                               |                                                       |                                                             | X                                                     | X                                                                       |                            |
| Under-recognition/under-treatment mentioned | X                           |                                                    |                                                  | X                                                               | X                                                                                             |                                                       |                                                             | X                                                     |                                                                         |                            |

|        |                            |                                |                                 |                       |                               |                                   |                             |                             |                            |                              |                                |
|--------|----------------------------|--------------------------------|---------------------------------|-----------------------|-------------------------------|-----------------------------------|-----------------------------|-----------------------------|----------------------------|------------------------------|--------------------------------|
| Author | Kloek et al <sup>214</sup> | Antognoli et al <sup>215</sup> | Nursing Standard <sup>216</sup> | Binnie <sup>217</sup> | Bramlage et al <sup>218</sup> | Kraschnewski et al <sup>219</sup> | Morris et al <sup>220</sup> | Sammur et al <sup>221</sup> | Smith et al <sup>222</sup> | Sonntag et al <sup>223</sup> | Timmerman et al <sup>224</sup> |
|--------|----------------------------|--------------------------------|---------------------------------|-----------------------|-------------------------------|-----------------------------------|-----------------------------|-----------------------------|----------------------------|------------------------------|--------------------------------|

| Title                                       | Dutch General Practitioners' weight management policy for | Direct observation of weight counselling in primary care. | GPs failing to offer weight-loss advice to people | Ten-year follow-up of obesity | Recognition and management of overweight and obesity | A silent response to the obesity epidemic: Decline in US physician | Who gets what treatment for obesity? A survey of | Audit of the diagnosis and management of adult | U.S. Primary care physicians' diet-, physical | Counseling overweight patients: Analysis of preventive | Weight management practices among primary care |
|---------------------------------------------|-----------------------------------------------------------|-----------------------------------------------------------|---------------------------------------------------|-------------------------------|------------------------------------------------------|--------------------------------------------------------------------|--------------------------------------------------|------------------------------------------------|-----------------------------------------------|--------------------------------------------------------|------------------------------------------------|
| Country                                     | The Netherlands                                           | USA                                                       | UK                                                | UK                            | Germany                                              | USA                                                                | Scotland                                         | Malta                                          | USA                                           | Germany                                                | USA                                            |
| Year                                        | 2014                                                      | 2014                                                      | 2015                                              | 1977                          | 2004                                                 | 2013                                                               | 1999                                             | 2012                                           | 2011                                          | 2010                                                   | 2000                                           |
| Methodology                                 | Cross sectional survey                                    | Direct observation                                        | Editorial                                         | Clinical audit                | Cross sectional survey                               | Clinical audit                                                     | Cross sectional survey                           | Clinical audit                                 | Clinical audit                                | Cross sectional survey                                 | Cross sectional survey                         |
| Diagnosis                                   | X                                                         | X                                                         | X                                                 | X                             | X                                                    | X                                                                  | X                                                | X                                              | X                                             | X                                                      | X                                              |
| Co-ordination                               | X                                                         | X                                                         |                                                   |                               | X                                                    |                                                                    | X                                                | X                                              |                                               | X                                                      | X                                              |
| Weight and height                           | X                                                         | X                                                         |                                                   | X                             | X                                                    |                                                                    | X                                                | X                                              | X                                             | X                                                      |                                                |
| Waist circumference                         | X                                                         | X                                                         |                                                   |                               |                                                      |                                                                    |                                                  | X                                              | X                                             |                                                        |                                                |
| System level/implementation                 |                                                           |                                                           |                                                   |                               |                                                      |                                                                    |                                                  |                                                |                                               |                                                        |                                                |
| Doctor-patient relationship                 | X                                                         |                                                           |                                                   | X                             |                                                      |                                                                    |                                                  |                                                |                                               | X                                                      |                                                |
| Public health role                          |                                                           |                                                           |                                                   |                               |                                                      |                                                                    |                                                  |                                                |                                               |                                                        |                                                |
| Prevention                                  |                                                           |                                                           |                                                   |                               |                                                      |                                                                    | X                                                |                                                |                                               |                                                        |                                                |
| Nutrition education                         | X                                                         | X                                                         | X                                                 | X                             | X                                                    | X                                                                  | X                                                | X                                              | X                                             | X                                                      | X                                              |
| Physical activity education                 | X                                                         | X                                                         | X                                                 |                               | X                                                    | X                                                                  | X                                                | X                                              | X                                             | X                                                      | X                                              |
| Behaviour modification                      |                                                           | X                                                         | X                                                 |                               |                                                      |                                                                    | X                                                | X                                              | X                                             | X                                                      | X                                              |
| Counselling/psychology                      |                                                           |                                                           |                                                   |                               |                                                      |                                                                    | X                                                |                                                |                                               |                                                        |                                                |
| Role modelling                              |                                                           |                                                           |                                                   |                               |                                                      |                                                                    |                                                  |                                                |                                               |                                                        |                                                |
| Group based interventions                   |                                                           | X                                                         |                                                   |                               |                                                      |                                                                    | X                                                |                                                |                                               |                                                        | X                                              |
| Medications                                 | X                                                         | X                                                         | X                                                 | X                             |                                                      |                                                                    | X                                                | X                                              | X                                             |                                                        | X                                              |
| Bariatric surgery referral                  |                                                           | X                                                         |                                                   |                               |                                                      |                                                                    | X                                                | X                                              | X                                             |                                                        |                                                |
| Bariatric surgery work-up                   |                                                           |                                                           |                                                   |                               |                                                      |                                                                    |                                                  |                                                |                                               |                                                        |                                                |
| Bariatric surgery after care                |                                                           |                                                           |                                                   |                               |                                                      |                                                                    |                                                  |                                                |                                               |                                                        |                                                |
| Commercial weight loss program referral     |                                                           | X                                                         |                                                   |                               |                                                      |                                                                    | X                                                |                                                |                                               |                                                        | X                                              |
| Bariatric equipment in consultation room    |                                                           |                                                           |                                                   |                               |                                                      |                                                                    |                                                  |                                                |                                               |                                                        |                                                |
| Standard care undefined                     |                                                           |                                                           |                                                   |                               |                                                      |                                                                    |                                                  |                                                |                                               |                                                        |                                                |
| Exact role uncertain                        |                                                           |                                                           |                                                   |                               |                                                      | X                                                                  |                                                  |                                                |                                               |                                                        |                                                |
| Person centredness                          |                                                           |                                                           |                                                   |                               |                                                      |                                                                    |                                                  |                                                |                                               |                                                        |                                                |
| Whole person care                           | X                                                         | X                                                         |                                                   |                               |                                                      |                                                                    |                                                  |                                                |                                               |                                                        |                                                |
| Under-recognition/under-treatment mentioned | X                                                         |                                                           | X                                                 |                               | X                                                    | X                                                                  |                                                  |                                                | X                                             | X                                                      | X                                              |

| Author                                      | Gaglioti et al <sup>225</sup>             | Morris and Gravelle <sup>226</sup> | Huber et al <sup>227</sup>                                                                     | Asselin et al <sup>228</sup>                                                     |
|---------------------------------------------|-------------------------------------------|------------------------------------|------------------------------------------------------------------------------------------------|----------------------------------------------------------------------------------|
| Title                                       | Primary care's ecologic impact on obesity | GP supply and obesity              | Obesity management and continuing medical education in primary care: Results of a Swiss survey | Missing an opportunity: the embedded nature of weight management in primary care |
| Country                                     | USA                                       | UK                                 | Switzerland                                                                                    | Canada                                                                           |
| Year                                        | 2009                                      | 2008                               | 2011                                                                                           | 2015                                                                             |
| Methodology                                 | Epidemiology                              | Cross sectional survey             | Cross sectional survey                                                                         | Qualitative                                                                      |
| Diagnosis                                   | X                                         | X                                  | X                                                                                              | X                                                                                |
| Co-ordination                               |                                           |                                    | X                                                                                              | X                                                                                |
| Weight and height                           |                                           |                                    | X                                                                                              | X                                                                                |
| Waist circumference                         |                                           |                                    | X                                                                                              |                                                                                  |
| System level/implementation                 | X                                         |                                    |                                                                                                | X                                                                                |
| Doctor-patient relationship                 |                                           |                                    |                                                                                                |                                                                                  |
| Public health role                          | X                                         |                                    |                                                                                                |                                                                                  |
| Prevention                                  | X                                         |                                    |                                                                                                |                                                                                  |
| Nutrition education                         |                                           |                                    | X                                                                                              | X                                                                                |
| Physical activity education                 |                                           |                                    | X                                                                                              | X                                                                                |
| Behaviour modification                      |                                           |                                    | X                                                                                              | X                                                                                |
| Counselling/psychology                      |                                           |                                    |                                                                                                |                                                                                  |
| Role modelling                              |                                           |                                    |                                                                                                |                                                                                  |
| Group based interventions                   |                                           |                                    |                                                                                                |                                                                                  |
| Medications                                 |                                           |                                    |                                                                                                |                                                                                  |
| Bariatric surgery referral                  |                                           |                                    |                                                                                                |                                                                                  |
| Bariatric surgery work-up                   |                                           |                                    |                                                                                                |                                                                                  |
| Bariatric surgery after care                |                                           |                                    |                                                                                                |                                                                                  |
| Commercial weight loss program referral     |                                           |                                    |                                                                                                |                                                                                  |
| Bariatric equipment in consultation room    |                                           |                                    |                                                                                                |                                                                                  |
| Standard care undefined                     |                                           |                                    |                                                                                                |                                                                                  |
| Exact role uncertain                        | X                                         | X                                  |                                                                                                | X                                                                                |
| Person centredness                          |                                           |                                    |                                                                                                | X                                                                                |
| Whole person care                           |                                           |                                    |                                                                                                | X                                                                                |
| Under-recognition/under-treatment mentioned |                                           |                                    |                                                                                                | X                                                                                |

**TABLE 5: International guidelines on the management of adult obesity in primary care, the role of the family doctor (FD) (over 2 pages)**

| Guideline                                                                                                                                                                                                                    | Country     | Year | Intended for a FD audience?     | FD mentioned | Primary healthcare mentioned | FD – measure the patient | FD – nutrition/ physical activity advice | FD– behavioural supports | FD- Frequency of visits mentioned | FD- Advice on use of intensive treatments | FD – referral to allied health | FD- referral to specialist obesity services | Does not mention specific role for FD |
|------------------------------------------------------------------------------------------------------------------------------------------------------------------------------------------------------------------------------|-------------|------|---------------------------------|--------------|------------------------------|--------------------------|------------------------------------------|--------------------------|-----------------------------------|-------------------------------------------|--------------------------------|---------------------------------------------|---------------------------------------|
| RACGP SNAP – Overweight and obesity, 2nd edition <sup>229</sup>                                                                                                                                                              | Australia   | 2015 | X                               | X            | X                            | X                        | X                                        |                          | X                                 | X                                         | X                              |                                             |                                       |
| National Institute for Health and Care Excellence “Managing adults who are overweight or obese” <sup>230</sup>                                                                                                               | UK          | 2015 | X                               |              |                              |                          |                                          |                          |                                   |                                           |                                |                                             | X                                     |
| Recommendations for prevention of weight gain and use of behavioural and pharmacologic interventions to manage overweight and obesity in adults in primary care Canadian Task Force on Preventive Health Care <sup>231</sup> | Canada      | 2015 | X                               |              | X                            |                          |                                          |                          |                                   |                                           |                                |                                             | X                                     |
| Clinical practice guidelines for the management of overweight and obesity in adults, adolescents and children in Australia <sup>1</sup>                                                                                      | Australia   | 2013 | X                               | X            | X                            | X                        |                                          | X                        | X                                 | X                                         | X                              | X                                           |                                       |
| Institute for Clinical Systems Improvement Health Care Guideline Prevention and Management of Obesity for Adults <sup>232</sup>                                                                                              | USA         | 2013 | X                               |              | X                            |                          |                                          |                          |                                   |                                           |                                |                                             | X                                     |
| Guideline for the Management of Overweight and Obesity in Adults<br>A Report of the American College of Cardiology/American Heart Association Task Force on Practice Guidelines and The Obesity Society <sup>233</sup>       | USA         | 2013 | Primary care Practitioner (PCP) | PCP          | X                            |                          |                                          |                          |                                   |                                           |                                |                                             | X                                     |
| New Zealand Primary Care Handbook 2012 – Weight Management <sup>234</sup>                                                                                                                                                    | New Zealand | 2012 | X                               | X            | X                            | X                        | X                                        | X                        | X                                 | X                                         | X                              |                                             |                                       |
| U.S. Preventive Services Task Force Screening for and Management of Obesity in Adults: Recommendation Statement <sup>235</sup>                                                                                               | USA         | 2012 | X                               | X            | X                            | X                        | X                                        | X                        | X                                 |                                           | X                              | X                                           |                                       |
| Screening for and management of obesity in adults: U.S. Preventive Services Task Force recommendation statement. <sup>236</sup>                                                                                              | USA         | 2012 | X                               |              | X                            | X                        |                                          |                          |                                   |                                           | X                              | X                                           |                                       |
| RACGP Guidelines for preventive activities in general practice 8th edition; 7.2 Overweight <sup>237</sup>                                                                                                                    | Australia   | 2012 | X                               | X            | X                            | X                        | X                                        | X                        | X                                 |                                           | X                              |                                             |                                       |
| National guide to a preventive health assessment for Aboriginal and Torres Strait Islander people<br>Second edition; Overweight/Obesity <sup>238</sup>                                                                       | Australia   | 2012 | X                               | X            | X                            |                          |                                          |                          |                                   |                                           |                                |                                             | X                                     |
| British Columbia Ministry of Health Services                                                                                                                                                                                 | Canada      | 2011 | X                               |              | X                            |                          |                                          |                          |                                   |                                           |                                |                                             | X                                     |

1  
2  
3  
4  
5  
6  
7  
8  
9  
10  
11  
12  
13  
14  
15  
16  
17  
18  
19  
20  
21  
22  
23  
24  
25  
26  
27  
28  
29  
30  
31  
32  
33  
34  
35  
36  
37  
38  
39  
40  
41  
42  
43  
44  
45  
46  
47

|                                                                                                                                      |               |      |   |   |   |   |   |   |   |   |  |   |   |
|--------------------------------------------------------------------------------------------------------------------------------------|---------------|------|---|---|---|---|---|---|---|---|--|---|---|
| Primary care providers have an important role in preventing and managing obesity through services offered to patients <sup>239</sup> |               |      |   |   |   |   |   |   |   |   |  |   |   |
| World Gastroenterological Organisation: Obesity Guideline <sup>240</sup>                                                             | International | 2011 | X |   | X |   |   |   |   |   |  |   | X |
| Scottish Intercollegiate Guidelines Network – Management of Obesity <sup>241</sup>                                                   | Scotland      | 2010 | X |   | X |   |   |   |   |   |  |   | X |
| Dutch College of General Practitioners: Obesity Guideline <sup>242</sup>                                                             | Netherlands   | 2010 | X | X | X | X | X | X | X | X |  | X |   |
| WHO – Interventions on Diet and Physical Activity: What works <sup>243</sup>                                                         | WHO           | 2009 | X |   | X |   |   |   |   |   |  |   | X |

For peer review only

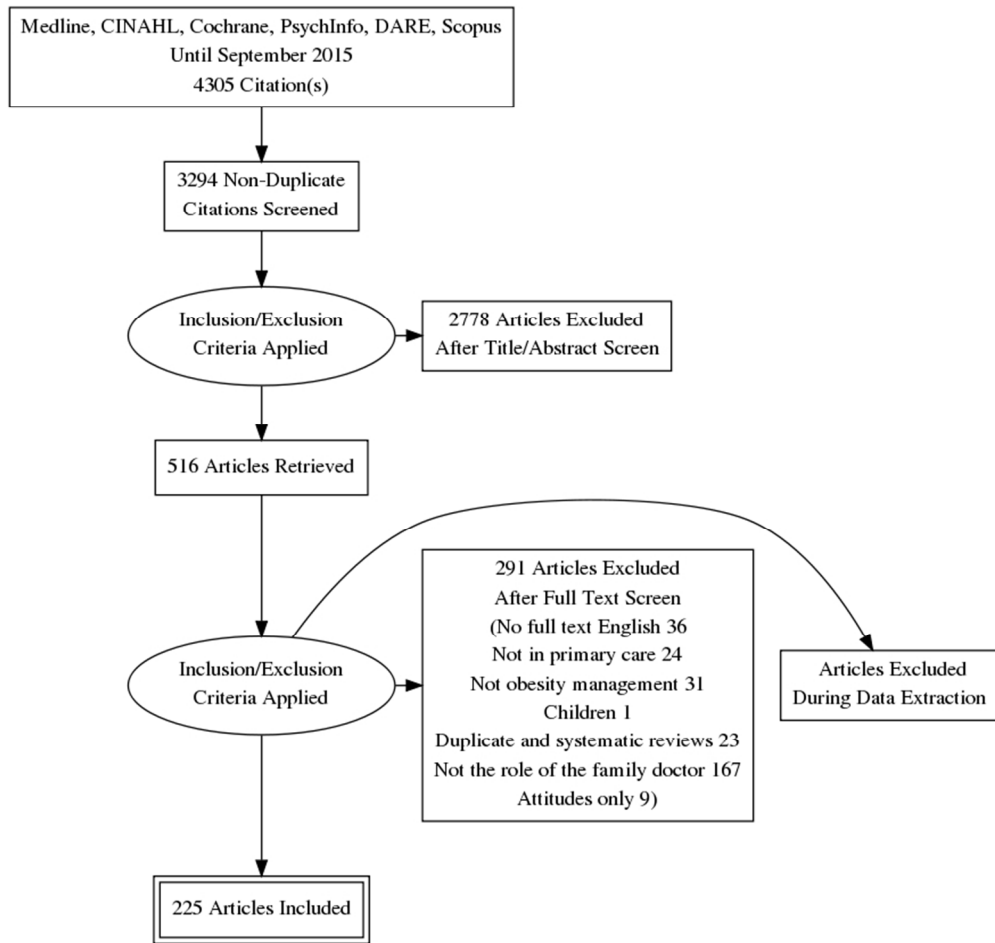

Figure 1 - PRISMA flow diagram for scoping review of the role of family doctors in obesity management

74x70mm (300 x 300 DPI)

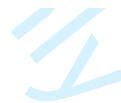



## Supplementary file

[PubMed Search terms and strategy](#)

September 2015

- (Primary care)
- (Primary health care)
- (General practice)
- AND
- (obes\*)
- (overweight)
- (over weight)
- (obesity/)
- (weight counselling)
- (weight management)
- (weight loss)
- AND
- (primary care physician)
- (primary care practitioner)
- (family doctor)
- (family practitioner)
- (family physician)
- (general practitioner)
- NOT
- (children)
