# Supplementary material for: Role of the family doctor in the management of adults with obesity: a scoping review
Source: PubMed Central journal article supplement — BMJ Open. 2018 Feb 16;8(2):e019367. doi: 10.1136/bmjopen-2017-019367 (PMC5829928; doi:10.1136/bmjopen-2017-019367), 2018-02-16
Supplement: bmjopen-2017-019367supp001.pdf [file bmjopen-2017-019367supp001.pdf]

## Supplementary file

### PubMed Search terms and strategy

September 2015

- (Primary care)
- (Primary health care)
- (General practice)
- AND
- (obes\*)
- (overweight)
- (over weight)
- (obesity/)
- (weight counselling)
- (weight management)
- (weight loss)
- AND
- (primary care physician)
- (primary care practitioner)
- (family doctor)
- (family practitioner)
- (family physician)
- (general practitioner)
- NOT
- (children)
